# Supplementary material for: Transcriptomics Analysis of Candida albicans Treated with Huanglian Jiedu Decoction Using RNA-seq
Source: Evid Based Complement Alternat Med. 2016 Apr 6;2016:3198249. doi: 10.1155/2016/3198249 (PMC4837275; doi:10.1155/2016/3198249)
Supplement: Supplementary file 1 — Table S1: 735 differentially expressed genes (DEGs). Table S2: A list of primers used in real-time PCR analysis and comparison in the changes of gene expression. Table S3: Significant pathways of DEGs. [file 3198249.f1.xlsx]

## Sheet: Supporting Information TABLE S1
Supporting Information TABLE S1: 735 differentially expressed genes (DEGs).
GeneID	log2Ratio(CA_CD/CA_CK)	Probability	KEGG Orthology	GO Component	GO Function	GO Process	Blast nr
orf19.7007	11.2545	0.80733	-	-	-	-	gi|68471049|ref|XP_720301.1|/6.55436e-67/hypothetical protein CaO19.7007 [Candida albicans SC5314]
orf19.3907	11.2051	0.801745	-	-	-	-	gi|68467637|ref|XP_721977.1|/3.89447e-43/hypothetical protein CaO19.11388 [Candida albicans SC5314]
orf19.4461	9.84791	0.952727	-	-	-	-	gi|68488335|ref|XP_711956.1|/5.91406e-60/hypothetical protein CaO19.4461 [Candida albicans SC5314]
orf19.6897	9.4249	0.92444	-	-	-	-	gi|68487283|ref|XP_712469.1|/2.30343e-64/hypothetical protein CaO19.6897 [Candida albicans SC5314]
orf19.6302	9.32208	0.848632	-	-	-	-	gi|238879948|gb|EEQ43586.1|/5.81268e-30/predicted protein [Candida albicans WO-1]
orf19.5262	9.30813	0.918772	-	-	-	-	gi|68479175|ref|XP_716393.1|/1.41663e-45/hypothetical protein CaO19.12727 [Candida albicans SC5314]
orf19.2585	8.89928	0.849706	-	-	-	-	gi|68475457|ref|XP_718251.1|/3.09977e-117/hypothetical protein CaO19.2585 [Candida albicans SC5314]
orf19.635	8.86595	0.923009	-	-	-	GO:0006351//transcription, DNA-dependent	gi|68488294|ref|XP_711981.1|/9.32017e-95/hypothetical protein CaO19.635 [Candida albicans SC5314]
orf19.4822	8.85469	0.814347	K01175|1|1e-67|256|afm:AFUA_7G00110|[EC:3.1.-.-];K01046|2|4e-40|165|afm:AFUA_5G14150|triacylglycerol lipase [EC:3.1.1.3]	-	GO:0004091//carboxylesterase activity	GO:0006629//lipid metabolic process	gi|358029469|gb|AEU04527.1|/0/lipase 10 [Candida albicans]
orf19.2505	8.67105	0.904958	-	-	-	-	gi|68474797|ref|XP_718606.1|/1.09537e-53/hypothetical protein CaO19.10041 [Candida albicans SC5314]
orf19.2922	8.26777	0.988938	K06695|1|2e-73|267|cdu:CD36_45690|26S proteasome regulatory subunit, ATPase 3, interacting protein	-	-	-	gi|238881273|gb|EEQ44911.1|/1.2827e-87/conserved hypothetical protein [Candida albicans WO-1]
orf19.7192	7.9547	0.943867	-	-	-	-	gi|68481744|ref|XP_715240.1|/5.68596e-63/hypothetical protein CaO19.7192 [Candida albicans SC5314]
orf19.599	7.91319	0.813907	-	-	-	-	gi|68483735|ref|XP_714226.1|/8.54403e-67/hypothetical protein CaO19.599 [Candida albicans SC5314]
orf19.2366	7.84154	0.884294	-	-	-	-	gi|68486908|ref|XP_712676.1|/0/hypothetical protein CaO19.9902 [Candida albicans SC5314]
orf19.3159.4	7.84076	0.836855	-	-	-	-	gi|238879501|gb|EEQ43139.1|/1.07519e-37/predicted protein [Candida albicans WO-1]
orf19.6222	7.73358	0.963981	-	-	-	-	gi|68474204|ref|XP_718811.1|/0/hypothetical protein CaO19.6222 [Candida albicans SC5314]
orf19.2625	7.72332	0.820181	-	-	-	-	gi|68491621|ref|XP_710398.1|/1.58964e-44/hypothetical protein CaO19.2625 [Candida albicans SC5314]
orf19.1620	7.70561	0.850669	-	-	-	-	gi|68468279|ref|XP_721699.1|/5.62919e-82/hypothetical protein CaO19.1620 [Candida albicans SC5314]
orf19.2539	7.70168	0.894805	-	-	-	-	gi|68475174|ref|XP_718305.1|/1.66066e-30/hypothetical protein CaO19.10073 [Candida albicans SC5314]
orf19.2332	7.67669	0.928072	-	-	-	-	gi|68484206|ref|XP_713995.1|/8.7212e-110/hypothetical protein CaO19.9868 [Candida albicans SC5314]
orf19.3905	7.64674	0.803726	-	-	-	-	gi|68467633|ref|XP_721975.1|/1.98354e-118/hypothetical protein CaO19.11386 [Candida albicans SC5314]
orf19.3209	7.62408	0.804166	-	-	-	-	gi|68490443|ref|XP_710949.1|/3.40255e-39/hypothetical protein CaO19.3209 [Candida albicans SC5314]
orf19.7071	7.60041	0.913323	K08369|1|2e-72|272|pic:PICST_43272|MFS transporter, putative metabolite:H+ symporter;K08176|3|9e-06|51.2|bfu:BC1G_08663|MFS transporter, PHS family, inorganic phosphate transporter	GO:0031224//intrinsic to membrane	-	GO:0006810//transport	gi|68471173|ref|XP_720363.1|/0/hypothetical protein CaO19.7071 [Candida albicans SC5314]
orf19.5233	7.58802	0.882092	-	-	-	-	gi|68479246|ref|XP_716302.1|/1.42741e-61/hypothetical protein CaO19.5233 [Candida albicans SC5314]
orf19.1530	7.55678	0.878185	-	-	-	-	gi|68466757|ref|XP_722574.1|/1.74427e-85/hypothetical protein CaO19.1530 [Candida albicans SC5314]
orf19.5866	7.47573	0.880249	-	-	-	-	gi|68465441|ref|XP_723082.1|/2.04282e-44/hypothetical protein CaO19.5866 [Candida albicans SC5314]
orf19.3719	7.42701	0.824308	-	-	-	-	gi|68485221|ref|XP_713444.1|/1.23909e-72/hypothetical protein CaO19.11203 [Candida albicans SC5314]
orf19.2713	7.42581	0.935722	K08741|1|0.0|1204|cal:CaO19.2713|DNA mismatch repair protein MSH5	-	GO:0032559;GO:0003690//double-stranded DNA binding	GO:0006281//DNA repair	gi|68470914|ref|XP_720464.1|/0/hypothetical protein CaO19.2713 [Candida albicans SC5314]
orf19.4884	7.3522	0.930659	K14443|1|2e-09|64.3|lel:LELG_03995|protein Tob/BTG	-	-	-	gi|74587914|sp|Q5AP80.1|WOR1_CANAL/0/RecName: Full=White-opaque regulator 1
orf19.533	7.32917	0.871168	-	-	-	-	gi|68477206|ref|XP_717396.1|/8.06116e-57/hypothetical protein CaO19.533 [Candida albicans SC5314]
orf19.6957	7.29856	0.871416	-	-	-	-	gi|68486808|ref|XP_712758.1|/9.57369e-58/hypothetical protein CaO19.6957 [Candida albicans SC5314]
orf19.6267	7.22287	0.94604	K03846|1|3e-35|149|ure:UREG_07209|alpha-1,2-mannosyltransferase [EC:2.4.1.259 2.4.1.261]	-	-	-	gi|68474290|ref|XP_718854.1|/0/hypothetical HRQ family protein 3 [Candida albicans SC5314]
orf19.7013	7.15069	0.97873	-	-	-	-	gi|68471061|ref|XP_720307.1|/0/hypothetical protein CaO19.7013 [Candida albicans SC5314]
orf19.7167	7.1409	0.954268	-	-	-	-	gi|68481700|ref|XP_715218.1|/1.22644e-18/hypothetical protein CaO19.7169 [Candida albicans SC5314]
orf19.2252	7.10129	0.884514	-	-	-	-	gi|68482420|ref|XP_714842.1|/0/conserved fungal hypothetical protein [Candida albicans SC5314]
orf19.5141	7.06525	0.937785	-	-	-	-	gi|68477921|ref|XP_716964.1|/0/hypothetical LPF family protein 35 [Candida albicans SC5314]
orf19.6200	7.00483	0.901326	K15071|1|2e-21|102|ani:AN0358.2|recyclin-1	-	-	-	gi|68474164|ref|XP_718791.1|/7.77421e-146/hypothetical protein CaO19.6200 [Candida albicans SC5314]
orf19.7208	6.98428	0.802295	K08293|1|0.0|563|cdu:CD36_12990|mitogen-activated protein kinase [EC:2.7.11.24]	-	GO:0004702//receptor signaling protein serine/threonine kinase activity;GO:0032559	GO:0006464//cellular protein modification process	gi|238878227|gb|EEQ41865.1|/0/sporulation-specific mitogen-activated protein kinase SMK1 [Candida albicans WO-1]
orf19.5588	6.93587	0.914919	-	-	-	-	gi|68473651|ref|XP_719150.1|/2.48982e-158/hypothetical protein CaO19.5588 [Candida albicans SC5314]
orf19.2310	6.87704	0.989048	-	-	GO:0005488//binding	-	gi|68484162|ref|XP_713973.1|/1.92384e-155/hypothetical protein CaO19.9846 [Candida albicans SC5314]
orf19.5231	6.85238	0.948544	-	-	-	-	gi|68479242|ref|XP_716300.1|/0/hypothetical protein CaO19.5231 [Candida albicans SC5314]
orf19.5831	6.82689	0.967311	-	-	-	-	gi|68481464|ref|XP_715371.1|/0/hypothetical protein CaO19.5831 [Candida albicans SC5314]
orf19.1105.3	6.76362	0.933851	-	-	-	-	gi|68489952|ref|XP_711178.1|/1.15379e-27/hypothetical protein CaO19.8702 [Candida albicans SC5314]
orf19.2430	6.71236	0.946838	-	-	-	-	gi|238878937|gb|EEQ42575.1|/2.13052e-133/conserved hypothetical protein [Candida albicans WO-1]
orf19.7557	6.71103	0.99169	-	-	-	-	gi|68473027|ref|XP_719319.1|/7.75991e-44/hypothetical protein CaO19.7557 [Candida albicans SC5314]
orf19.2583.1	6.69717	0.817952	-	-	-	GO:0006810//transport	gi|238879664|gb|EEQ43302.1|/5.80359e-38/predicted protein [Candida albicans WO-1]
orf19.4814	6.68037	0.913323	-	-	-	-	gi|68464845|ref|XP_723500.1|/1.54713e-44/hypothetical protein CaO19.4814 [Candida albicans SC5314]
orf19.5121	6.67528	0.972759	-	-	-	GO:0006810//transport	gi|68476729|ref|XP_717657.1|/0/potential oligopeptide transporter [Candida albicans SC5314]
orf19.634	6.65836	0.855264	-	-	-	-	gi|68488292|ref|XP_711980.1|/4.79468e-144/hypothetical protein CaO19.634 [Candida albicans SC5314]
orf19.6859	6.65819	0.923312	-	-	-	-	gi|68487812|ref|XP_712247.1|/3.57921e-67/hypothetical protein CaO19.6859 [Candida albicans SC5314]
orf19.5926	6.65715	0.981481	K15114|1|2e-174|610|cal:CaO19.13347|mitochondrial ornithine carrier protein	GO:0019866//organelle inner membrane;GO:0031224//intrinsic to membrane	-	GO:0006810//transport	gi|68465553|ref|XP_723138.1|/1.96327e-173/potential mitochondrial ornithine transporter [Candida albicans SC5314]
orf19.3306	6.62837	0.953002	K12778|1|0.0|1142|cal:CaO19.10816|meiosis-specific protein HOP1	-	-	GO:0000087//M phase of mitotic cell cycle	gi|68475025|ref|XP_718398.1|/0/hypothetical protein CaO19.10816 [Candida albicans SC5314]
orf19.2885	6.61538	0.859887	K02685|1|0.0|981|cal:CaO19.10403|DNA primase large subunit [EC:2.7.7.-]	-	GO:0003899//DNA-directed RNA polymerase activity	GO:0006259//DNA metabolic process	gi|68480888|ref|XP_715597.1|/0/hypothetical protein CaO19.10403 [Candida albicans SC5314]
orf19.3801	6.6088	0.846871	-	-	-	-	gi|68477470|ref|XP_717206.1|/0/hypothetical protein CaO19.3801 [Candida albicans SC5314]
orf19.4463	6.59105	0.849926	-	-	-	-	gi|189093860|ref|XP_442675.1|/1.99738e-156/hypothetical protein CaO19.4463 [Candida albicans SC5314]
orf19.7336	6.55219	0.886853	K10866|1|1e-53|210|nhe:NECHADRAFT_65858|DNA repair protein RAD50 [EC:3.6.-.-];K13095|3|5e-33|142|fgr:FG02080.1|splicing factor 1;K01952|4|1e-29|130|pno:SNOG_10851|phosphoribosylformylglycinamidine synthase [EC:6.3.5.3];K01705|5|3e-13|76.3|pno:SNOG_01131|homoaconitate hydratase [EC:4.2.1.36]	-	-	GO:0006810//transport	gi|68479072|ref|XP_716470.1|/0/potential MFS-MDR transporter [Candida albicans SC5314]
orf19.7054	6.54837	0.8696	-	-	-	-	gi|68471139|ref|XP_720346.1|/1.89714e-58/hypothetical protein CaO19.7054 [Candida albicans SC5314]
orf19.3406	6.54646	0.989379	K00122|1|2e-126|451|pic:PICST_47526|formate dehydrogenase [EC:1.2.1.2];K02598|2|2e-22|106|uma:UM00083.1|nitrite transporter NirC	GO:0044464//cell part	-	GO:0051234//establishment of localization	gi|68478429|ref|XP_716716.1|/0/hypothetical protein CaO19.3406 [Candida albicans SC5314]
orf19.3868	6.53586	0.915993	-	-	-	-	gi|68485168|ref|XP_713493.1|/7.56186e-47/hypothetical protein CaO19.3868 [Candida albicans SC5314]
orf19.948	6.52892	0.939106	-	-	-	-	gi|68478211|ref|XP_716847.1|/1.70733e-38/hypothetical protein CaO19.8563 [Candida albicans SC5314]
orf19.1529	6.52506	0.926669	-	-	-	-	gi|68466755|ref|XP_722573.1|/1.39799e-159/hypothetical protein CaO19.1529 [Candida albicans SC5314]
orf19.7055	6.52423	0.881542	-	-	-	-	gi|68471141|ref|XP_720347.1|/9.52956e-18/hypothetical protein CaO19.7055 [Candida albicans SC5314]
orf19.6391	6.51195	0.942959	-	-	-	-	gi|68479399|ref|XP_716231.1|/3.90849e-155/hypothetical protein CaO19.6391 [Candida albicans SC5314]
orf19.2868	6.4687	0.817979	-	-	-	-	gi|68480856|ref|XP_715581.1|/2.1028e-73/hypothetical LDG family protein 9 [Candida albicans SC5314]
orf19.4189	6.45627	0.926779	K01078|1|1e-52|206|pic:PICST_83142|acid phosphatase [EC:3.1.3.2];K03787|2|3e-11|68.9|cal:CaO19.4424|5'-nucleotidase [EC:3.1.3.5]	-	GO:0003824//catalytic activity	-	gi|68486731|ref|XP_712794.1|/0/possible acid phosphatase [Candida albicans SC5314]
orf19.5933	6.34934	0.875929	-	-	-	-	gi|68465567|ref|XP_723145.1|/0/hypothetical protein CaO19.5933 [Candida albicans SC5314]
orf19.4976	6.33772	0.951516	-	-	-	-	gi|68467502|ref|XP_722184.1|/1.09395e-29/possible mitochondrial Complex I, subunit 6 [Candida albicans SC5314]
orf19.4169	6.33463	0.889659	-	-	-	-	gi|68486996|ref|XP_712623.1|/6.36872e-46/hypothetical protein CaO19.4169 [Candida albicans SC5314]
orf19.4685	6.33301	0.827005	-	-	-	-	gi|68466247|ref|XP_722898.1|/4.73507e-41/hypothetical protein CaO19.12154 [Candida albicans SC5314]
orf19.6339	6.31277	0.884734	-	-	-	-	gi|68491419|ref|XP_710507.1|/1.76194e-35/hypothetical protein CaO19.6339 [Candida albicans SC5314]
orf19.4011	6.26516	0.940262	K01066|1|9e-08|57.4|afm:AFUA_6G09520|esterase / lipase [EC:3.1.1.-]	-	-	-	gi|68467843|ref|XP_722080.1|/0/potential esterase/lipase [Candida albicans SC5314]
orf19.3888.2	6.26023	0.955368	-	-	-	-	gi|238878795|gb|EEQ42433.1|/1.0518e-16/hypothetical protein CAWG_00644 [Candida albicans WO-1]
orf19.5216	6.22023	0.945463	K01068|1|1e-20|99.4|uma:UM00334.1|palmitoyl-CoA hydrolase [EC:3.1.2.2];K01076|3|5e-16|84.3|pic:PICST_89284|[EC:3.1.2.-];K11992|4|6e-16|84.0|scm:SCHCODRAFT_80675|acyl-CoA thioesterase 8 [EC:3.1.2.27]	-	GO:0016289//CoA hydrolase activity	GO:0006732//coenzyme metabolic process	gi|68490535|ref|XP_710924.1|/2.66413e-169/potential acyl-CoA thioesterase Tes4p [Candida albicans SC5314]
orf19.6475	6.21864	0.960762	-	-	-	-	gi|68469058|ref|XP_721316.1|/2.461e-42/hypothetical protein CaO19.6475 [Candida albicans SC5314]
orf19.664	6.20674	0.922624	-	-	-	-	gi|68484453|ref|XP_713837.1|/1.56929e-123/hypothetical protein CaO19.8281 [Candida albicans SC5314]
orf19.3117	6.19873	0.938583	-	-	-	-	gi|68481162|ref|XP_715496.1|/2.45359e-66/potential cell surface antigen [Candida albicans SC5314]
orf19.3735	6.19552	0.957515	-	-	-	-	gi|68485324|ref|XP_713423.1|/0/hypothetical protein CaO19.3735 [Candida albicans SC5314]
orf19.1257	6.18714	0.913599	-	-	-	-	gi|238881313|gb|EEQ44951.1|/1.10922e-50/conserved hypothetical protein [Candida albicans WO-1]
orf19.1207	6.18344	0.979968	-	-	-	-	gi|68492232|ref|XP_710106.1|/5.49225e-58/hypothetical protein CaO19.1207 [Candida albicans SC5314]
orf19.6851	6.18099	0.936134	K11551|1|0.0|863|cal:CaO19.14141|central kinetochore subunit Mis15/CHL4	-	-	-	gi|68487796|ref|XP_712239.1|/0/hypothetical protein CaO19.6851 [Candida albicans SC5314]
orf19.355	6.17692	0.913626	K03119|1|7e-51|200|afm:AFUA_4G00110|taurine dioxygenase [EC:1.14.11.17];K00478|4|2e-46|185|afm:AFUA_1G17170|[EC:1.14.11.-]	-	GO:0016701//oxidoreductase activity, acting on single donors with incorporation of molecular oxygen	GO:0008152//metabolic process	gi|68471753|ref|XP_720183.1|/0/potential taurine catabolic dioxygenase [Candida albicans SC5314]
orf19.6786	6.15952	0.974107	-	-	-	-	gi|241953771|ref|XP_002419607.1|/0/conserved hypothetical protein [Candida dubliniensis CD36]
orf19.4652	6.13288	0.881515	-	-	-	-	gi|68466189|ref|XP_722869.1|/8.12047e-41/hypothetical protein CaO19.12122 [Candida albicans SC5314]
orf19.6398	6.08857	0.971603	K03119|1|2e-111|401|pic:PICST_39554|taurine dioxygenase [EC:1.14.11.17];K00540|3|1e-96|352|sce:YLL057C|[EC:1.-.-.-]	-	GO:0016701//oxidoreductase activity, acting on single donors with incorporation of molecular oxygen	GO:0008152//metabolic process	gi|68479413|ref|XP_716238.1|/0/potential taurine catabolic dioxygenase [Candida albicans SC5314]
orf19.1348	6.04295	0.936877	-	-	-	-	gi|68491946|ref|XP_710240.1|/4.32199e-94/hypothetical protein CaO19.8928 [Candida albicans SC5314]
orf19.5978	6.02201	0.98272	K00540|1|7e-30|130|afm:AFUA_3G15030|[EC:1.-.-.-];K15385|2|4e-22|105|afv:AFLA_066920|aspyridone synthetase trans-acting enoyl reductase;K00344|4|6e-18|91.3|kla:KLLA0A10549g|NADPH2:quinone reductase [EC:1.6.5.5]	-	GO:0003824//catalytic activity;GO:0046914//transition metal ion binding	GO:0008152//metabolic process	gi|68465655|ref|XP_723189.1|/0/potential zinc-binding dehydrogenase [Candida albicans SC5314]
orf19.718	6.02125	0.989984	K15222|1|0.0|1145|cal:CaO19.718|RNA polymerase I-specific transcription initiation factor RRN11	-	GO:0005488//binding	-	gi|68486012|ref|XP_713078.1|/0/potential RNA Pol I transcription factor subunit Rrn11 [Candida albicans SC5314]
orf19.1874	6.01323	0.836718	K12776|1|1e-109|396|cdu:CD36_21800|meiosis-specific serine/threonine-protein kinase MEK1 [EC:2.7.11.1]	-	GO:0004672//protein kinase activity;GO:0032559	GO:0006464//cellular protein modification process	gi|238883644|gb|EEQ47282.1|/2.03797e-125/hypothetical protein CAWG_05849 [Candida albicans WO-1]
orf19.1831	5.99094	0.91104	-	-	-	-	gi|68490935|ref|XP_710715.1|/4.28363e-58/hypothetical protein CaO19.1831 [Candida albicans SC5314]
orf19.4566	5.98699	0.944885	-	GO:0044464//cell part	-	-	gi|68466017|ref|XP_722783.1|/1.3396e-109/hypothetical protein CaO19.12035 [Candida albicans SC5314]
orf19.4310	5.97992	0.850944	-	-	-	-	gi|68470743|ref|XP_720617.1|/9.72269e-87/hypothetical protein CaO19.4310 [Candida albicans SC5314]
orf19.701	5.94576	0.907132	K00521|1|4e-156|551|pic:PICST_40289|ferric-chelate reductase [EC:1.16.1.7]	GO:0031224//intrinsic to membrane	GO:0046914//transition metal ion binding;GO:0003824//catalytic activity;GO:0050662//coenzyme binding	GO:0008152//metabolic process	gi|68488733|ref|XP_711792.1|/0/likely ferric reductase [Candida albicans SC5314]
orf19.7634	5.93018	0.955891	K06670|1|0.0|970|cal:CaO19.7634|cohesin complex subunit SCC1	GO:0005694//chromosome	-	-	gi|68473177|ref|XP_719394.1|/0/potential nuclear cohesin complex subunit [Candida albicans SC5314]
orf19.4804	5.90736	0.868444	K01175|1|6e-73|274|afm:AFUA_7G00110|[EC:3.1.-.-];K01046|3|8e-38|157|afm:AFUA_5G14150|triacylglycerol lipase [EC:3.1.1.3]	-	GO:0004091//carboxylesterase activity	GO:0006629//lipid metabolic process	gi|68464825|ref|XP_723490.1|/0/C. albicans secretory lipase 2 [Candida albicans SC5314]
orf19.7170	5.89301	0.850338	-	-	-	-	gi|68481704|ref|XP_715220.1|/1.1445e-10/hypothetical protein CaO19.7171 [Candida albicans SC5314]
orf19.762	5.85048	0.921166	K01117|1|0.0|696|pic:PICST_51970|sphingomyelin phosphodiesterase [EC:3.1.4.12];K01128|2|1e-69|264|afm:AFUA_2G01600|[EC:3.1.4.-];K12350|3|9e-42|171|mgr:MGCH7_ch7g1043|sphingomyelin phosphodiesterase [EC:3.1.4.12]	-	GO:0003824//catalytic activity	-	gi|68484937|ref|XP_713607.1|/0/potential acid sphingomyelin phosphodiesterase [Candida albicans SC5314]
orf19.3906	5.8043	0.821556	-	-	-	-	gi|68467635|ref|XP_721976.1|/1.0367e-96/hypothetical protein CaO19.11387 [Candida albicans SC5314]
orf19.2429	5.75752	0.957102	-	-	-	-	gi|68474655|ref|XP_718535.1|/0/hypothetical LPF family protein 18 [Candida albicans SC5314]
orf19.4690	5.74855	0.895438	K12346|1|0.0|862|cal:CaO19.4690|metal iron transporter	-	-	-	gi|68466550|ref|XP_722757.1|/0/probable NRAMP manganese transporter [Candida albicans SC5314]
orf19.4200	5.73728	0.84489	-	-	-	-	gi|68489825|ref|XP_711252.1|/4.27988e-34/hypothetical protein CaO19.4200 [Candida albicans SC5314]
orf19.3828	5.73715	0.947664	-	-	-	-	gi|68477363|ref|XP_717308.1|/3.11147e-61/hypothetical protein CaO19.11309 [Candida albicans SC5314]
orf19.658	5.73699	0.914919	K11272|1|0.0|1911|cal:CaO19.658|mediator of replication checkpoint protein 1	-	-	-	gi|68484522|ref|XP_713792.1|/0/hypothetical protein CaO19.658 [Candida albicans SC5314]
orf19.2071	5.73366	0.864344	-	-	-	-	gi|68472647|ref|XP_719642.1|/1.25433e-83/hypothetical protein CaO19.9618 [Candida albicans SC5314]
orf19.4067	5.73308	0.80323	-	GO:0031224//intrinsic to membrane	-	-	gi|238883777|gb|EEQ47415.1|/2.83437e-73/conserved hypothetical protein [Candida albicans WO-1]
orf19.4057	5.70477	0.809752	-	-	-	-	gi|68490916|ref|XP_710726.1|/3.66047e-78/hypothetical protein CaO19.4057 [Candida albicans SC5314]
orf19.2583	5.70227	0.848385	K03305|1|1e-98|360|lth:KLTH0D16544g|proton-dependent oligopeptide transporter, POT family	GO:0031224//intrinsic to membrane	-	GO:0015833//peptide transport	gi|3859684|emb|CAA22021.1|/0/peptide transport protein [Candida albicans]
orf19.5748	5.702	0.988938	-	-	-	-	gi|68475755|ref|XP_718084.1|/4.76596e-119/hypothetical protein CaO19.5748 [Candida albicans SC5314]
orf19.5717	5.69895	0.846404	-	-	-	-	gi|68475697|ref|XP_718055.1|/1.05614e-64/hypothetical protein CaO19.5717 [Candida albicans SC5314]
orf19.3413	5.69056	0.899152	-	-	-	-	gi|3850138|emb|CAA21939.1|/3.78224e-38/questionable orf [Candida albicans]
orf19.5489	5.68342	0.91957	-	-	-	-	gi|68489328|ref|XP_711505.1|/3.45705e-76/hypothetical protein CaO19.12944 [Candida albicans SC5314]
orf19.7480	5.68066	0.803918	-	-	-	-	gi|68474528|ref|XP_718637.1|/1.50718e-90/hypothetical protein CaO19.7480 [Candida albicans SC5314]
orf19.5915	5.67918	0.910517	-	GO:0031224//intrinsic to membrane	-	GO:0030001//metal ion transport	gi|238880862|gb|EEQ44500.1|/0/hypothetical protein CAWG_02770 [Candida albicans WO-1]
orf19.5499	5.67018	0.800534	K00457|1|0.0|897|cal:CaO19.12954|4-hydroxyphenylpyruvate dioxygenase [EC:1.13.11.27]	-	GO:0016702//oxidoreductase activity, acting on single donors with incorporation of molecular oxygen, incorporation of two atoms of oxygen	GO:0006520//cellular amino acid metabolic process	gi|68489346|ref|XP_711514.1|/0/hypothetical protein CaO19.12954 [Candida albicans SC5314]
orf19.271	5.66981	0.910352	K00059|1|1e-29|129|act:ACLA_006690|3-oxoacyl-[acyl-carrier protein] reductase [EC:1.1.1.100]	-	GO:0004312//fatty acid synthase activity	GO:0008152//metabolic process	gi|68471589|ref|XP_720101.1|/7.48022e-143/hypothetical protein CaO19.7903 [Candida albicans SC5314]
orf19.4853	5.66756	0.949618	K09413|1|0.0|888|cal:CaO19.12316|forkhead transcription factor HCM1	-	GO:0003677//DNA binding	GO:0006351//transcription, DNA-dependent	gi|68464921|ref|XP_723538.1|/0/potential forkhead-like transcriptional regulator [Candida albicans SC5314]
orf19.6532	5.66505	0.973282	K15115|1|2e-175|613|cal:CaO19.13885|solute carrier family 25 (mitochondrial folate transporter), member 32	GO:0031224//intrinsic to membrane;GO:0043231//intracellular membrane-bounded organelle	-	GO:0046907//intracellular transport	gi|68469166|ref|XP_721370.1|/2.30693e-174/potential mitochondrial FAD transporter [Candida albicans SC5314]
orf19.5820	5.65135	0.923835	K09885|1|4e-97|354|ani:AN7168.2|aquaporin rerated protein, other eukaryote	GO:0031224//intrinsic to membrane	GO:0005275//amine transmembrane transporter activity	GO:0006865//amino acid transport	gi|68481444|ref|XP_715361.1|/0/potential GABA-specific transport protein [Candida albicans SC5314]
orf19.3863	5.61141	0.971713	K11426|1|3e-32|139|dha:DEHA2G10846g|SET and MYND domain-containing protein	-	-	-	gi|68485081|ref|XP_713530.1|/0/possible SET-like protein [Candida albicans SC5314]
orf19.4819	5.60267	0.980216	-	-	-	-	gi|68464855|ref|XP_723505.1|/1.42213e-45/hypothetical protein CaO19.4819 [Candida albicans SC5314]
orf19.7151	5.59983	0.929063	-	-	-	-	gi|68481664|ref|XP_715200.1|/5.13853e-80/hypothetical protein CaO19.7151 [Candida albicans SC5314]
orf19.4647	5.5846	0.92444	K14679|1|4e-30|125|ppl:POSPLDRAFT_101360|tRNA ligase [EC:6.5.1.3];K08065|3|1e-27|117|cci:CC1G_09213|nuclear transcription Y subunit beta	GO:0043231//intracellular membrane-bounded organelle	GO:0003677//DNA binding	GO:0006351//transcription, DNA-dependent	gi|68466177|ref|XP_722863.1|/2.98874e-94/potential histone-like transcription factor [Candida albicans SC5314]
orf19.1117	5.57791	0.942023	K00122|1|0.0|766|cal:CaO19.1117|formate dehydrogenase [EC:1.2.1.2]	-	GO:0016620//oxidoreductase activity, acting on the aldehyde or oxo group of donors, NAD or NADP as acceptor;GO:0016614//oxidoreductase activity, acting on CH-OH group of donors;GO:0000166//nucleotide binding	GO:0008152//metabolic process	gi|68490019|ref|XP_711169.1|/0/potential NAD-formate dehydrogenase [Candida albicans SC5314]
orf19.4104	5.55733	0.885752	-	-	-	-	gi|68483644|ref|XP_714275.1|/0/hypothetical protein CaO19.4104 [Candida albicans SC5314]
orf19.2417	5.55429	0.959523	K01553|1|0.0|901|pic:PICST_30460|myosin ATPase [EC:3.6.4.1];K06669|3|1e-18|95.5|cdu:CD36_82710|structural maintenance of chromosome 3 (chondroitin sulfate proteoglycan 6);K12614|4|2e-18|94.7|ani:AN3460.2|ATP-dependent RNA helicase DDX6/DHH1 [EC:3.6.4.13]	GO:0043232	GO:0032559	-	gi|68485641|ref|XP_713303.1|/0/potential nuclear DNA repair complex SMC ATPase [Candida albicans SC5314]
orf19.2211	5.52987	0.890567	-	-	-	-	gi|68480009|ref|XP_716051.1|/2.95769e-151/hypothetical protein CaO19.2211 [Candida albicans SC5314]
orf19.1106	5.51849	0.914066	-	-	-	-	gi|238882772|gb|EEQ46410.1|/0/conserved hypothetical protein [Candida albicans WO-1]
orf19.5716	5.50634	0.930961	K06005|1|0.0|827|cal:CaO19.13139|candidapepsin [EC:3.4.23.24]	-	GO:0004175//endopeptidase activity	GO:0019538//protein metabolic process	gi|68475695|ref|XP_718054.1|/0/secretory aspartyl proteinase SAP4p [Candida albicans SC5314]
orf19.3693	5.48745	0.875048	-	-	GO:0043167//ion binding;GO:0003824//catalytic activity	GO:0044238//primary metabolic process	gi|68484655|ref|XP_713787.1|/0/hypothetical protein CaO19.3693 [Candida albicans SC5314]
orf19.322	5.48709	0.890017	-	-	-	-	gi|68471948|ref|XP_720017.1|/3.85526e-35/hypothetical protein CaO19.322 [Candida albicans SC5314]
orf19.5212	5.48323	0.873122	-	-	GO:0046914//transition metal ion binding	-	gi|238882355|gb|EEQ45993.1|/0/conserved hypothetical protein [Candida albicans WO-1]
orf19.7190	5.48221	0.958918	K03660|1|0.0|702|cal:CaO19_7190|N-glycosylase/DNA lyase [EC:3.2.2.- 4.2.99.18]	-	GO:0003677//DNA binding;GO:0000702//oxidized base lesion DNA N-glycosylase activity;GO:0016835//carbon-oxygen lyase activity	GO:0006281//DNA repair	gi|68481742|ref|XP_715239.1|/0/hypothetical protein CaO19.7190 [Candida albicans SC5314]
orf19.95	5.46006	0.982087	-	-	-	-	gi|68483487|ref|XP_714304.1|/1.90906e-127/possible membrane protein [Candida albicans SC5314]
orf19.5839	5.45095	0.96233	K01101|1|1e-44|179|uma:UM04979.1|4-nitrophenyl phosphatase [EC:3.1.3.41]	-	-	-	gi|68481480|ref|XP_715379.1|/0/hypothetical protein CaO19.5839 [Candida albicans SC5314]
orf19.4195	5.44784	0.976116	-	-	-	-	gi|68489815|ref|XP_711247.1|/3.34388e-71/potential zinc finger protein [Candida albicans SC5314]
orf19.7440	5.44308	0.882918	K05658|1|0.0|2367|cal:CaO19.7440|ATP-binding cassette, subfamily B (MDR/TAP), member 1	GO:0031224//intrinsic to membrane	GO:0017111//nucleoside-triphosphatase activity;GO:0015405;GO:0032559	GO:0006810//transport;GO:0009207	gi|68479866|ref|XP_716101.1|/0/potential peptide pheromone ABC transporter [Candida albicans SC5314]
orf19.4908	5.44104	0.959331	-	-	-	-	gi|68465025|ref|XP_723590.1|/9.02818e-61/hypothetical protein CaO19.4908 [Candida albicans SC5314]
orf19.2796	5.43826	0.904518	K02321|1|0.0|1253|cal:CaO19.2796|DNA polymerase alpha subunit B	-	GO:0003676//nucleic acid binding;GO:0034061	GO:0006259//DNA metabolic process	gi|68488876|ref|XP_711738.1|/0/hypothetical protein CaO19.2796 [Candida albicans SC5314]
orf19.1647	5.41421	0.931402	-	-	-	-	gi|68468329|ref|XP_721724.1|/2.77798e-116/hypothetical protein CaO19.1647 [Candida albicans SC5314]
orf19.1968	5.38099	0.991387	-	-	-	-	gi|238882511|gb|EEQ46149.1|/8.01454e-49/conserved hypothetical protein [Candida albicans WO-1]
orf19.5779	5.37975	0.98737	K10807|1|0.0|1703|cal:CaO19.13201|ribonucleoside-diphosphate reductase subunit M1 [EC:1.17.4.1]	GO:0043234//protein complex	GO:0032559;GO:0016728	GO:0006259//DNA metabolic process	gi|7271006|emb|CAB77640.1|/0/ribonucleotide reductase large subunit [Candida albicans]
orf19.5172	5.37539	0.928678	K01175|1|1e-56|144|afm:AFUA_7G00110|[EC:3.1.-.-];K01046|5|7e-18|91.3|afm:AFUA_5G14150|triacylglycerol lipase [EC:3.1.1.3]	-	GO:0004091//carboxylesterase activity	GO:0006629//lipid metabolic process	gi|77022906|ref|XP_888897.1|/0/hypothetical protein CaO19_5172 [Candida albicans SC5314]
orf19.4161	5.37156	0.918964	-	-	-	-	gi|68486673|ref|XP_712765.1|/0/hypothetical protein CaO19.11637 [Candida albicans SC5314]
orf19.6715	5.35267	0.870425	-	-	-	-	gi|68472037|ref|XP_719814.1|/2.98298e-51/hypothetical protein CaO19.6715 [Candida albicans SC5314]
orf19.3109	5.35185	0.894612	-	-	-	-	gi|68481146|ref|XP_715488.1|/1.9456e-107/hypothetical protein CaO19.10621 [Candida albicans SC5314]
orf19.1302	5.34933	0.842964	-	-	-	-	gi|68486189|ref|XP_709943.1|/2.85213e-80/hypothetical protein CaO19.1302 [Candida albicans SC5314]
orf19.7452	5.33676	0.905646	K10731|1|0.0|1301|cal:CaO19.7452|DNA replication regulator SLD3	-	-	-	gi|68479891|ref|XP_716113.1|/0/hypothetical protein CaO19.7452 [Candida albicans SC5314]
orf19.2919	5.32934	0.960294	K14635|1|0.0|1971|cal:CaO19.2919|ATP-dependent DNA helicase MPH1 [EC:3.6.4.12]	GO:0043231//intracellular membrane-bounded organelle	GO:0003676//nucleic acid binding;GO:0017111//nucleoside-triphosphatase activity;GO:0032559	GO:0006259//DNA metabolic process;GO:0033554//cellular response to stress	gi|74679884|sp|Q5A1A0.1|MPH1_CANAL/0/RecName: Full=ATP-dependent DNA helicase MPH1
orf19.5958	5.31662	0.992873	K08711|1|0.0|2561|cal:CaO19.6000|ATP-binding cassette, subfamily G (WHITE), member 2, PDR	GO:0031224//intrinsic to membrane	GO:0017111//nucleoside-triphosphatase activity;GO:0015405;GO:0032559	GO:0009207;GO:0051234//establishment of localization	gi|68465615|ref|XP_723169.1|/0/multidrug resistance ABC transporter [Candida albicans SC5314]
orf19.1286	5.31328	0.825381	-	-	-	-	gi|68491064|ref|XP_710667.1|/1.97983e-55/hypothetical protein CaO19.1286 [Candida albicans SC5314]
orf19.926	5.29543	0.918579	K10746|1|0.0|1312|cal:CaO19.8541|exonuclease 1 [EC:3.1.-.-]	-	GO:0016788//hydrolase activity, acting on ester bonds;GO:0003676//nucleic acid binding	GO:0006259//DNA metabolic process	gi|68478167|ref|XP_716825.1|/0/hypothetical protein CaO19.8541 [Candida albicans SC5314]
orf19.5714	5.29473	0.97961	K06005|1|0.0|772|cal:CaO19.13137|candidapepsin [EC:3.4.23.24]	-	GO:0004175//endopeptidase activity	GO:0019538//protein metabolic process	gi|68475693|ref|XP_718053.1|/0/secretory aspartyl proteinase SAP1p [Candida albicans SC5314]
orf19.389	5.26413	0.966595	-	-	-	-	gi|68488445|ref|XP_711906.1|/2.81241e-62/hypothetical protein CaO19.8019 [Candida albicans SC5314]
orf19.4196	5.26046	0.901189	-	-	-	-	gi|68489817|ref|XP_711248.1|/4.21503e-50/hypothetical protein CaO19.4196 [Candida albicans SC5314]
orf19.2247	5.25943	0.917919	-	-	-	-	gi|68482410|ref|XP_714837.1|/0/conserved fungal hypothetical protein [Candida albicans SC5314]
orf19.5092	5.2557	0.929173	K11696|1|3e-85|313|cal:CaO19.12558|centromere-localized protein 2	-	-	-	gi|68476673|ref|XP_717629.1|/2.42072e-84/hypothetical protein CaO19.5092 [Candida albicans SC5314]
orf19.7083	5.24975	0.972621	K11271|1|0.0|685|cal:CaO19_7083|sister chromatid cohesion protein DCC1	-	-	-	gi|68471195|ref|XP_720374.1|/0/hypothetical protein CaO19.7083 [Candida albicans SC5314]
orf19.7494	5.24528	0.91104	-	-	-	-	gi|68474556|ref|XP_718651.1|/0/hypothetical protein CaO19.7494 [Candida albicans SC5314]
orf19.3760	5.23909	0.809532	K10872|1|2e-163|508|cdu:CD36_11740|meiotic recombination protein DMC1	GO:0043231//intracellular membrane-bounded organelle	GO:0042623//ATPase activity, coupled;GO:0032559;GO:0043566//structure-specific DNA binding	GO:0006310//DNA recombination;GO:0009207	gi|241950183|ref|XP_002417814.1|/1.66777e-162/DNA double-strand-break repair and homologue-pairing meiosis protein (DMC1/RAD51 homologue), putative [Candida dubliniensis CD36]
orf19.6115	5.23697	0.979886	-	-	-	-	gi|68473942|ref|XP_719074.1|/1.30008e-59/hypothetical protein CaO19.6115 [Candida albicans SC5314]
orf19.3638	5.21675	0.88157	-	-	-	-	gi|68483187|ref|XP_714527.1|/1.09739e-156/hypothetical protein CaO19.11120 [Candida albicans SC5314]
orf19.2783	5.21003	0.871884	-	-	-	-	gi|68488801|ref|XP_711747.1|/6.49324e-168/hypothetical protein CaO19.10299 [Candida albicans SC5314]
orf19.1351	5.20112	0.914204	-	-	-	-	gi|68491969|ref|XP_710235.1|/5.91237e-94/hypothetical protein CaO19.1351 [Candida albicans SC5314]
orf19.508	5.20015	0.976914	K01647|1|8e-15|81.3|ani:AN7593.2|citrate synthase [EC:2.3.3.1];K08157|2|1e-11|70.5|ppa:PAS_chr1-4_0194|MFS transporter, DHA1 family, multidrug resistance protein;K10866|3|2e-09|63.5|fgr:FG00711.1|DNA repair protein RAD50 [EC:3.6.-.-];K12604|5|7e-09|61.6|aor:AOR_1_978154|CCR4-NOT transcription complex subunit 1	-	-	GO:0006810//transport	gi|68476965|ref|XP_717460.1|/0/potential quinidine/multidrug transporter [Candida albicans SC5314]
orf19.7564	5.19196	0.945435	K02325|1|0.0|1363|cal:CaO19.7564|DNA polymerase epsilon subunit 2 [EC:2.7.7.7]	-	GO:0003676//nucleic acid binding;GO:0034061	GO:0006259//DNA metabolic process	gi|68473041|ref|XP_719326.1|/0/potential DNA polymerase epsilon subunit [Candida albicans SC5314]
orf19.1171	5.18529	0.87048	K13621|1|0.0|1517|cal:CaO19.1171|betaine lipid synthase	-	GO:0016741	GO:0006730//one-carbon metabolic process	gi|68486105|ref|XP_713069.1|/0/hypothetical protein CaO19.8764 [Candida albicans SC5314]
orf19.3088	5.16115	0.985416	-	GO:0044424//intracellular part	-	-	gi|68481106|ref|XP_715468.1|/4.23594e-77/hypothetical protein CaO19.10600 [Candida albicans SC5314]
orf19.2010	5.15702	0.86074	-	-	-	-	gi|68472788|ref|XP_719459.1|/8.5479e-67/hypothetical protein CaO19.2010 [Candida albicans SC5314]
orf19.984	5.14895	0.91558	K01077|1|0.0|956|cal:CaO19.8599|alkaline phosphatase [EC:3.1.3.1]	-	GO:0016791//phosphatase activity	GO:0006796//phosphate-containing compound metabolic process	gi|68489864|ref|XP_711225.1|/0/hypothetical protein CaO19.8599 [Candida albicans SC5314]
orf19.4136	5.14083	0.927604	K10997|1|0.0|1181|cal:CaO19.4136|replication fork protection complex subunit Tof1/Swi1	-	GO:0003824//catalytic activity	GO:0009987//cellular process	gi|68489637|ref|XP_711340.1|/0/hypothetical protein CaO19.4136 [Candida albicans SC5314]
orf19.5713	5.13734	0.972731	K03885|1|0.0|1145|cal:CaO19.13136|NADH dehydrogenase [EC:1.6.99.3]	-	GO:0050136//NADH dehydrogenase (quinone) activity;GO:0050662//coenzyme binding	GO:0008152//metabolic process	gi|68475691|ref|XP_718052.1|/0/potential mitochondrial nonproton-pumping NADH dehydrogenase [Candida albicans SC5314]
orf19.7606	5.13063	0.957074	-	-	-	-	gi|68473125|ref|XP_719368.1|/1.43386e-40/hypothetical protein CaO19.7606 [Candida albicans SC5314]
orf19.4568	5.11117	0.957047	K09248|1|1e-09|64.7|sce:YKL015W|proline utilization trans-activator;K09240|3|2e-07|57.8|sce:YMR280C|transcriptional regulatory protein CAT8;K01684|4|5e-06|52.8|ani:AN4828.2|galactonate dehydratase [EC:4.2.1.6]	GO:0043231//intracellular membrane-bounded organelle	GO:0046914//transition metal ion binding;GO:0003676//nucleic acid binding;GO:0001071//nucleic acid binding transcription factor activity	GO:0006351//transcription, DNA-dependent	gi|68466316|ref|XP_722640.1|/0/hypothetical protein CaO19.4568 [Candida albicans SC5314]
orf19.2350	5.10569	0.897199	K08165|1|2e-72|272|cgr:CAGL0M03003g|MFS transporter, DHA2 family, multidrug resistance protein;K01705|4|9e-30|130|pno:SNOG_01131|homoaconitate hydratase [EC:4.2.1.36];K10866|5|1e-09|64.3|nhe:NECHADRAFT_65858|DNA repair protein RAD50 [EC:3.6.-.-]	-	-	GO:0006810//transport	gi|68484240|ref|XP_714012.1|/0/hypothetical protein CaO19.9886 [Candida albicans SC5314]
orf19.2739	5.1004	0.963733	K01390|1|4e-73|275|pic:PICST_28598|IgA-specific metalloendopeptidase [EC:3.4.24.13]	-	-	-	gi|68470964|ref|XP_720489.1|/0/hypothetical protein CaO19.2739 [Candida albicans SC5314]
orf19.812	5.09651	0.920533	-	-	-	-	gi|68469613|ref|XP_721058.1|/0/hypothetical protein CaO19.8432 [Candida albicans SC5314]
orf19.2197	5.09604	0.839992	K00485|1|9e-165|579|pic:PICST_32260|dimethylaniline monooxygenase (N-oxide forming) [EC:1.14.13.8]	-	GO:0000166//nucleotide binding;GO:0050662//coenzyme binding;GO:0016709//oxidoreductase activity, acting on paired donors, with incorporation or reduction of molecular oxygen, NAD(P)H as one donor, and incorporation of one atom of oxygen	GO:0008152//metabolic process	gi|68479979|ref|XP_716037.1|/0/hypothetical protein CaO19.2197 [Candida albicans SC5314]
orf19.2624	5.08543	0.910407	-	-	-	-	gi|68491619|ref|XP_710397.1|/0/hypothetical protein CaO19.2624 [Candida albicans SC5314]
orf19.687	5.08145	0.967833	-	-	-	-	gi|68484501|ref|XP_713861.1|/0/hypothetical protein CaO19.8305 [Candida albicans SC5314]
orf19.7411	5.08135	0.959166	K15117|1|0.0|692|cal:CaO19.7411|solute carrier family 25, member 34/35	GO:0019866//organelle inner membrane;GO:0031224//intrinsic to membrane	-	GO:0006810//transport	gi|68479814|ref|XP_716076.1|/0/potential mitochondrial oxaloacetate, sulfate, and thiosulfate transporter [Candida albicans SC5314]
orf19.4942	5.07571	0.977354	-	-	-	-	gi|68467211|ref|XP_722267.1|/1.44514e-66/hypothetical protein CaO19.12408 [Candida albicans SC5314]
orf19.3049	5.07322	0.887843	K12771|1|0.0|871|cal:CaO19.10567|sporulation-specific protein 1 [EC:2.7.11.1]	-	GO:0004672//protein kinase activity;GO:0032559	GO:0006464//cellular protein modification process	gi|68468977|ref|XP_721547.1|/0/likely protein kinase [Candida albicans SC5314]
orf19.1065	5.06248	0.997001	K03283|1|0.0|1092|cal:CaO19.1065|heat shock 70kDa protein 1/8	-	GO:0032559	GO:0050896//response to stimulus	gi|68484805|ref|XP_713714.1|/0/likely HSP70 family chaperonin [Candida albicans SC5314]
orf19.3140	5.05268	0.875048	-	-	-	-	gi|68481349|ref|XP_715449.1|/7.46062e-47/hypothetical protein CaO19.3140 [Candida albicans SC5314]
orf19.1935	5.04645	0.830472	-	-	-	-	gi|68480625|ref|XP_715698.1|/6.241e-57/hypothetical protein CaO19.1935 [Candida albicans SC5314]
orf19.5873	5.04081	0.962853	K02320|1|0.0|2796|cal:CaO19.13294|DNA polymerase alpha subunit A [EC:2.7.7.7]	-	GO:0003676//nucleic acid binding;GO:0034061	GO:0006259//DNA metabolic process	gi|68465455|ref|XP_723089.1|/0/likely DNA polymerase I alpha subunit p180 [Candida albicans SC5314]
orf19.4945	5.03653	0.962303	K08737|1|0.0|2157|cal:CaO19.4945|DNA mismatch repair protein MSH6	-	GO:0032559;GO:0003690//double-stranded DNA binding	GO:0006281//DNA repair	gi|68467217|ref|XP_722270.1|/0/hypothetical protein CaO19.12411 [Candida albicans SC5314]
orf19.4015	5.03025	0.947003	K04640|1|0.0|804|cal:CaO19.4015|guanine nucleotide-binding protein subunit alpha, other	-	GO:0032561//guanyl ribonucleotide binding;GO:0060089	GO:0007166//cell surface receptor signaling pathway	gi|68467851|ref|XP_722084.1|/0/potential pheromone response pathway G protein subunit [Candida albicans SC5314]
orf19.4571	5.02969	0.817374	K01796|1|3e-13|76.3|yli:YALI0B00462g|alpha-methylacyl-CoA racemase [EC:5.1.99.4]	-	-	-	gi|68466027|ref|XP_722788.1|/0/hypothetical protein CaO19.12040 [Candida albicans SC5314]
orf19.3200	5.0092	0.842166	-	-	-	-	gi|60390196|sp|Q71U11.1|MATA2_CANAL/4.40907e-96/RecName: Full=Mating-type-like protein A2; Short=MTLa2 protein
orf19.5284	4.99886	0.945297	-	-	-	-	gi|68491677|ref|XP_710365.1|/6.38724e-54/hypothetical protein CaO19.5284 [Candida albicans SC5314]
orf19.2869	4.99563	0.830031	-	-	-	-	gi|68480858|ref|XP_715582.1|/7.20865e-73/hypothetical LDG family protein 10 [Candida albicans SC5314]
orf19.1264	4.99483	0.80678	K00521|1|2e-133|476|pic:PICST_40289|ferric-chelate reductase [EC:1.16.1.7]	GO:0031224//intrinsic to membrane	GO:0046914//transition metal ion binding;GO:0003824//catalytic activity;GO:0050662//coenzyme binding	GO:0008152//metabolic process	gi|68478820|ref|XP_716572.1|/0/likely ferric reductase [Candida albicans SC5314]
orf19.689	4.98276	0.820538	K13333|1|0.0|1143|cal:CaO19.689|lysophospholipase [EC:3.1.1.5]	-	GO:0004091//carboxylesterase activity;GO:0016298//lipase activity	GO:0006644//phospholipid metabolic process	gi|68484582|ref|XP_713822.1|/0/phospholipase B1 [Candida albicans SC5314]
orf19.768	4.96819	0.880056	K14430|1|8e-09|62.4|dha:DEHA2E06842g|phosphate transporter	GO:0031224//intrinsic to membrane	-	-	gi|68485024|ref|XP_713578.1|/0/hypothetical protein CaO19.768 [Candida albicans SC5314]
orf19.1581	4.96791	0.818007	-	-	-	-	gi|68466855|ref|XP_722623.1|/2.08705e-57/hypothetical protein CaO19.1581 [Candida albicans SC5314]
orf19.4834	4.96509	0.817594	-	-	-	-	gi|68464885|ref|XP_723520.1|/2.89396e-132/hypothetical protein CaO19.4834 [Candida albicans SC5314]
orf19.6142	4.96281	0.871664	-	-	-	-	gi|68487528|ref|XP_712385.1|/2.67339e-103/hypothetical protein CaO19.13561 [Candida albicans SC5314]
orf19.2492	4.95539	0.916543	K04627|1|0.0|771|cal:CaO19.10028|pheromone a factor receptor	GO:0031224//intrinsic to membrane	GO:0016503//pheromone receptor activity	GO:0007166//cell surface receptor signaling pathway	gi|68474773|ref|XP_718594.1|/0/potential a-factor pheromone receptor [Candida albicans SC5314]
orf19.6288	4.95064	0.955258	-	-	-	-	gi|68490048|ref|XP_711145.1|/1.30373e-97/hypothetical protein CaO19.6288 [Candida albicans SC5314]
orf19.1541	4.93906	0.957074	-	-	GO:0005488//binding	-	gi|68466777|ref|XP_722584.1|/0/hypothetical protein CaO19.1541 [Candida albicans SC5314]
orf19.513	4.92996	0.824033	K12769|1|0.0|929|cal:CaO19.513|meiosis-specific transcription factor NDT80	-	GO:0001071//nucleic acid binding transcription factor activity	GO:0010467//gene expression	gi|68476977|ref|XP_717466.1|/0/hypothetical protein CaO19.8144 [Candida albicans SC5314]
orf19.2164.1	4.91512	0.900831	-	-	-	-	-
orf19.5762	4.90859	0.818667	-	-	-	-	gi|68475781|ref|XP_718097.1|/1.91505e-90/hypothetical protein CaO19.5762 [Candida albicans SC5314]
orf19.1827	4.90325	0.859144	-	-	-	-	gi|68490600|ref|XP_710887.1|/0/hypothetical protein CaO19.9386 [Candida albicans SC5314]
orf19.2503	4.896	0.91635	-	-	-	-	gi|68474793|ref|XP_718604.1|/0/hypothetical protein CaO19.10039 [Candida albicans SC5314]
orf19.1080	4.88654	0.932585	-	-	-	-	gi|68488069|ref|XP_712093.1|/7.1554e-93/hypothetical protein CaO19.1080 [Candida albicans SC5314]
orf19.5289	4.88132	0.875488	-	-	-	-	gi|68491687|ref|XP_710370.1|/3.41045e-31/hypothetical protein CaO19.5289 [Candida albicans SC5314]
orf19.3196	4.87751	0.910709	-	-	-	-	gi|68482963|ref|XP_714612.1|/2.62114e-55/hypothetical protein CaO19.3196 [Candida albicans SC5314]
orf19.3942	4.87725	0.977161	K12189|1|2e-110|396|cal:CaO19.3942|ESCRT-II complex subunit VPS25	-	-	-	gi|68467705|ref|XP_722011.1|/1.82147e-109/hypothetical protein CaO19.11424 [Candida albicans SC5314]
orf19.4569	4.87401	0.948379	K01567|1|1e-27|122|afm:AFUA_2G02920|[EC:3.-.-.-]	-	-	-	gi|68466023|ref|XP_722786.1|/7.29782e-149/hypothetical protein CaO19.12038 [Candida albicans SC5314]
orf19.6164	4.85422	0.868279	-	-	-	-	gi|68491106|ref|XP_710645.1|/1.04389e-48/hypothetical protein CaO19.6164 [Candida albicans SC5314]
orf19.605	4.85123	0.905096	-	-	-	-	gi|68483747|ref|XP_714232.1|/2.42715e-53/hypothetical protein CaO19.605 [Candida albicans SC5314]
orf19.2431	4.85094	0.871966	-	-	-	-	gi|68474659|ref|XP_718537.1|/1.39022e-56/hypothetical protein CaO19.9967 [Candida albicans SC5314]
orf19.7597	4.85009	0.846128	-	-	-	-	gi|68473107|ref|XP_719359.1|/0/phosphomutase-like protein [Candida albicans SC5314]
orf19.3748	4.84743	0.870095	-	-	-	-	gi|68485350|ref|XP_713436.1|/2.66906e-52/hypothetical protein CaO19.3748 [Candida albicans SC5314]
orf19.2923	4.84418	0.986765	K15451|1|4e-13|75.5|ncr:NCU05392|tRNA wybutosine-synthesizing protein 4 [EC:2.1.1.-];K10882|2|9e-13|74.3|ure:UREG_04659|crossover junction endonuclease EME1 [EC:3.1.22.-]	-	-	-	gi|68480958|ref|XP_715632.1|/0/potential transmembrane protein [Candida albicans SC5314]
orf19.4301	4.83144	0.899675	-	-	GO:0005488//binding	GO:0006351//transcription, DNA-dependent	gi|68470464|ref|XP_720736.1|/0/hypothetical protein CaO19.11777 [Candida albicans SC5314]
orf19.5264	4.82145	0.811348	-	-	-	-	gi|68479179|ref|XP_716395.1|/7.00731e-77/hypothetical protein CaO19.12729 [Candida albicans SC5314]
orf19.6936	4.80774	0.966017	K02831|1|0.0|1244|cal:CaO19.14198|ser/thr/tyr protein kinase RAD53 [EC:2.7.11.-]	-	GO:0004672//protein kinase activity;GO:0032559	GO:0006464//cellular protein modification process	gi|68486766|ref|XP_712737.1|/0/likely protein kinase [Candida albicans SC5314]
orf19.7024	4.80679	0.828848	-	-	-	-	gi|68471083|ref|XP_720318.1|/6.20549e-57/hypothetical protein CaO19.7024 [Candida albicans SC5314]
orf19.2735	4.80594	0.987095	K15322|1|0.0|692|cal:CaO19.10249|tRNA-splicing endonuclease subunit Sen2 [EC:3.1.27.9]	GO:0043234//protein complex	GO:0005488//binding;GO:0004549//tRNA-specific ribonuclease activity	GO:0000394//RNA splicing, via endonucleolytic cleavage and ligation	gi|68470956|ref|XP_720485.1|/0/potential tRNA splicing endonuclease subunit [Candida albicans SC5314]
orf19.1137	4.80011	0.981647	K00943|1|1e-114|410|cal:CaO19.1137|dTMP kinase [EC:2.7.4.9]	-	GO:0016776//phosphotransferase activity, phosphate group as acceptor;GO:0032559	GO:0009197;GO:0006796//phosphate-containing compound metabolic process;GO:0009212//pyrimidine deoxyribonucleoside triphosphate biosynthetic process	gi|238878423|gb|EEQ42061.1|/1.2449e-113/thymidylate kinase [Candida albicans WO-1]
orf19.1539	4.79368	0.855071	-	-	-	-	gi|68466775|ref|XP_722583.1|/1.33577e-159/hypothetical protein CaO19.1539 [Candida albicans SC5314]
orf19.6574	4.79245	0.801717	K00493|1|8e-90|330|pic:PICST_35590|unspecific monooxygenase [EC:1.14.14.1];K00495|2|3e-74|278|afm:AFUA_4G03800|[EC:1.14.14.-]	GO:0044464//cell part	GO:0004497//monooxygenase activity;GO:0005506//iron ion binding	GO:0008152//metabolic process	gi|68469246|ref|XP_721410.1|/0/potential n-alkane inducible cytochrome P-450 [Candida albicans SC5314]
orf19.6027	4.7896	0.901987	-	-	-	-	gi|68473772|ref|XP_718989.1|/1.18667e-143/hypothetical protein CaO19.6027 [Candida albicans SC5314]
orf19.5422	4.78401	0.959468	-	-	-	-	gi|68476289|ref|XP_717794.1|/1.23838e-93/hypothetical protein CaO19.5422 [Candida albicans SC5314]
orf19.1834	4.7776	0.869297	-	-	-	-	gi|68490859|ref|XP_710756.1|/0/hypothetical protein CaO19.9392 [Candida albicans SC5314]
orf19.7094	4.7654	0.868664	K08139|1|2e-131|468|pic:PICST_85501|MFS transporter, SP family, sugar:H+ symporter	GO:0031224//intrinsic to membrane	GO:0022857//transmembrane transporter activity	GO:0071702	gi|68471217|ref|XP_720385.1|/0/potential sugar sensor or transporter [Candida albicans SC5314]
orf19.4391	4.75501	0.852815	-	-	-	-	gi|68481851|ref|XP_715167.1|/0/hypothetical YFW family protein 7 [Candida albicans SC5314]
orf19.4567	4.75186	0.956249	K03381|1|3e-168|590|cal:CaO19.12036|catechol 1,2-dioxygenase [EC:1.13.11.1]	-	GO:0019114;GO:0005506//iron ion binding	GO:0018958//phenol-containing compound metabolic process	gi|209572875|sp|P86029.1|HQD2_CANAL/2.56604e-167/RecName: Full=Catechol 1,2-dioxygenase
orf19.6502	4.73954	0.825574	K00540|1|1e-24|112|afm:AFUA_2G08050|[EC:1.-.-.-];K06123|2|1e-12|73.2|spo:SPAC23D3.11|1-acylglycerone phosphate reductase [EC:1.1.1.101];K00059|3|4e-10|65.1|ncr:NCU09473|3-oxoacyl-[acyl-carrier protein] reductase [EC:1.1.1.100];K00065|5|3e-09|62.0|scm:SCHCODRAFT_79855|2-deoxy-D-gluconate 3-dehydrogenase [EC:1.1.1.125]	-	GO:0003824//catalytic activity	GO:0008152//metabolic process	gi|68469106|ref|XP_721340.1|/4.3962e-169/hypothetical protein CaO19.6502 [Candida albicans SC5314]
orf19.5335	4.73301	0.967118	K10901|1|0.0|2029|cal:CaO19.12795|bloom syndrome protein [EC:3.6.4.12]	GO:0044464//cell part	GO:0004003//ATP-dependent DNA helicase activity;GO:0032559	GO:0006259//DNA metabolic process	gi|68477651|ref|XP_717138.1|/0/hypothetical protein CaO19.5335 [Candida albicans SC5314]
orf19.344	4.72534	0.967916	-	-	-	-	gi|68471731|ref|XP_720172.1|/7.69318e-101/hypothetical protein CaO19.7977 [Candida albicans SC5314]
orf19.4668	4.72477	0.929338	K01210|1|2e-93|342|pic:PICST_28554|glucan 1,3-beta-glucosidase [EC:3.2.1.58];K01238|2|5e-47|188|afm:AFUA_5G08780|[EC:3.2.1.-]	-	GO:0016798//hydrolase activity, acting on glycosyl bonds	GO:0008152//metabolic process	gi|68466219|ref|XP_722884.1|/0/potential glycosyl hydrolase [Candida albicans SC5314]
orf19.5423	4.72325	0.958175	K11133|1|2e-116|417|cal:CaO19.12878|telomere replication protein	GO:0044427//chromosomal part;GO:0030529//ribonucleoprotein complex	GO:0043565//sequence-specific DNA binding	GO:0006278//RNA-dependent DNA replication;GO:0032392//DNA geometric change	gi|68476291|ref|XP_717795.1|/1.52041e-115/possible telomerase component [Candida albicans SC5314]
orf19.6408	4.7087	0.994084	K09503|1|5e-50|198|cdu:CD36_29510|DnaJ homolog subfamily A member 2	-	GO:0043169//cation binding;GO:0005515//protein binding	GO:0044267//cellular protein metabolic process	gi|68479431|ref|XP_716247.1|/0/potential dnaJ-like heat shock protein [Candida albicans SC5314]
orf19.3512	4.7042	0.938528	-	-	-	-	gi|68492113|ref|XP_710158.1|/1.48572e-95/hypothetical protein CaO19.3513 [Candida albicans SC5314]
orf19.4069	4.70067	0.880166	-	-	-	-	gi|68483580|ref|XP_714243.1|/2.44733e-65/hypothetical protein CaO19.4069 [Candida albicans SC5314]
orf19.6138	4.68934	0.835067	K00521|1|5e-171|600|pic:PICST_40289|ferric-chelate reductase [EC:1.16.1.7]	GO:0031224//intrinsic to membrane	GO:0016723//oxidoreductase activity, oxidizing metal ions, NAD or NADP as acceptor;GO:0046914//transition metal ion binding;GO:0050662//coenzyme binding	GO:0008152//metabolic process	gi|68487520|ref|XP_712381.1|/0/likely ferric reductase [Candida albicans SC5314]
orf19.2916	4.67773	0.843404	-	-	-	-	gi|68481057|ref|XP_715570.1|/4.50407e-119/hypothetical protein CaO19.2916 [Candida albicans SC5314]
orf19.2673	4.66826	0.926008	-	-	-	-	gi|68470838|ref|XP_720426.1|/4.43441e-158/hypothetical protein CaO19.2673 [Candida albicans SC5314]
orf19.6562	4.66345	0.941308	K10743|1|0.0|825|cal:CaO19_6562|ribonuclease H2 subunit A [EC:3.1.26.4]	-	GO:0016891//endoribonuclease activity, producing 5'-phosphomonoesters;GO:0003676//nucleic acid binding	GO:0044260	gi|68469222|ref|XP_721398.1|/0/likely Ribonuclease HII [Candida albicans SC5314]
orf19.2034	4.65472	0.878983	-	-	-	-	gi|68472579|ref|XP_719608.1|/1.33464e-110/hypothetical protein CaO19.9582 [Candida albicans SC5314]
orf19.1748	4.65408	0.95369	-	-	-	-	gi|68483305|ref|XP_714394.1|/0/hypothetical protein CaO19.1748 [Candida albicans SC5314]
orf19.6907	4.65331	0.974217	K12662|1|3e-06|53.1|cal:CaO19.7343|U4/U6 small nuclear ribonucleoprotein PRP4;K10752|2|6e-06|52.0|tml:GSTUM_00011728001|histone-binding protein RBBP4	-	-	-	gi|74679675|sp|Q59S45.1|YD156_CANAL/0/RecName: Full=WD repeat-containing protein CaJ7.0141/CaO19.6907
orf19.7232	4.65026	0.962688	K06671|1|0.0|1095|cal:CaO19.7233|cohesin complex subunit SA-1/2	-	-	-	gi|68482031|ref|XP_715033.1|/0/potential nuclear cohesin complex subunit fragment [Candida albicans SC5314]
orf19.7293	4.64753	0.913516	K08866|1|0.0|1231|cal:CaO19.7293|serine/threonine-protein kinase TTK/MPS1 [EC:2.7.12.1]	-	GO:0004672//protein kinase activity;GO:0032559	GO:0006464//cellular protein modification process	gi|68478988|ref|XP_716428.1|/0/likely protein kinase [Candida albicans SC5314]
orf19.5009	4.64623	0.967063	K01090|1|2e-08|60.5|pic:PICST_52303|protein phosphatase [EC:3.1.3.16]	-	-	-	gi|68467331|ref|XP_722327.1|/0/hypothetical protein CaO19.12476 [Candida albicans SC5314]
orf19.1901	4.64485	0.983353	K02541|1|0.0|1527|cal:CaO19.1901|minichromosome maintenance protein 3	GO:0043231//intracellular membrane-bounded organelle	GO:0017111//nucleoside-triphosphatase activity;GO:0003676//nucleic acid binding;GO:0032559	GO:0006259//DNA metabolic process;GO:0009207	gi|238883627|gb|EEQ47265.1|/0/DNA replication licensing factor MCM3 [Candida albicans WO-1]
orf19.4367	4.62714	0.948159	K06636|1|0.0|2269|cal:CaO19.11845|structural maintenance of chromosome 1	GO:0043232	GO:0032559	GO:0006996//organelle organization	gi|68481803|ref|XP_715143.1|/0/potential nuclear cohesin complex SMC ATPase [Candida albicans SC5314]
orf19.4030	4.62586	0.985691	K02684|1|0.0|875|cal:CaO19.11513|DNA primase small subunit [EC:2.7.7.-]	GO:0043234//protein complex	GO:0003899//DNA-directed RNA polymerase activity	GO:0006259//DNA metabolic process;GO:0010467//gene expression	gi|68467881|ref|XP_722099.1|/0/hypothetical protein CaO19.11513 [Candida albicans SC5314]
orf19.5655	4.61913	0.931429	K00517|1|9e-49|194|mgr:MGG_12423|[EC:1.14.-.-]	-	GO:0046914//transition metal ion binding;GO:0051536//iron-sulfur cluster binding;GO:0016701//oxidoreductase activity, acting on single donors with incorporation of molecular oxygen	GO:0044237//cellular metabolic process	gi|68485413|ref|XP_713384.1|/4.46414e-129/hypothetical protein CaO19.13101 [Candida albicans SC5314]
orf19.2274	4.61049	0.938418	-	-	-	-	gi|68482462|ref|XP_714863.1|/4.70807e-91/hypothetical protein CaO19.2274 [Candida albicans SC5314]
orf19.7495	4.60804	0.944555	K00354|1|3e-113|407|pic:PICST_52325|NADPH2 dehydrogenase [EC:1.6.99.1]	-	GO:0016651//oxidoreductase activity, acting on NAD(P)H;GO:0000166//nucleotide binding	GO:0008152//metabolic process	gi|68474558|ref|XP_718652.1|/0/potential NADH-dependent flavin oxidoreductase [Candida albicans SC5314]
orf19.4818	4.59262	0.990865	-	-	-	-	gi|238878633|gb|EEQ42271.1|/0/conserved hypothetical protein [Candida albicans WO-1]
orf19.5616	4.59196	0.877882	-	-	-	-	gi|68473703|ref|XP_719176.1|/6.7995e-134/hypothetical protein CaO19.5616 [Candida albicans SC5314]
orf19.6342	4.59081	0.898024	K13110|1|2e-73|273|cal:CaO19.13698|microfibrillar-associated protein 1	-	-	-	gi|68489030|ref|XP_711628.1|/1.82059e-72/hypothetical protein CaO19.13698 [Candida albicans SC5314]
orf19.7002	4.5784	0.902152	-	-	-	-	gi|68482795|ref|XP_714707.1|/0/hypothetical protein CaO19.7002 [Candida albicans SC5314]
orf19.3100	4.56155	0.938583	K01553|1|0.0|1878|cal:CaO19.3100|myosin ATPase [EC:3.6.4.1];K10352|2|1e-25|118|nce:NCER_101653|myosin heavy chain;K09291|3|2e-24|114|zro:ZYRO0G06600g|nucleoprotein TPR	-	-	-	gi|68481269|ref|XP_715409.1|/0/hypothetical protein CaO19.3100 [Candida albicans SC5314]
orf19.2213	4.54435	0.942243	-	-	-	-	gi|68480013|ref|XP_716053.1|/0/hypothetical protein CaO19.2213 [Candida albicans SC5314]
orf19.6413	4.52834	0.972704	-	-	-	-	gi|68479441|ref|XP_716252.1|/0/hypothetical protein CaO19.6413 [Candida albicans SC5314]
orf19.7614	4.52165	0.930218	-	-	-	-	gi|68473139|ref|XP_719375.1|/0/hypothetical protein CaO19.7614 [Candida albicans SC5314]
orf19.5585	4.52045	0.949618	K06005|1|0.0|830|cal:CaO19.5585|candidapepsin [EC:3.4.23.24]	-	GO:0004175//endopeptidase activity	GO:0019538//protein metabolic process	gi|68473414|ref|XP_719265.1|/0/secretory aspartyl proteinase SAP5p [Candida albicans SC5314]
orf19.2552	4.51743	0.949975	K01539|1|0.0|1131|pic:PICST_60178|sodium/potassium-transporting ATPase subunit alpha [EC:3.6.3.9] K01541 H+/K+-exchanging ATPase [EC:3.6.3.10];K01541|5|0.0|704|afm:AFUA_5G00730|H+/K+-exchanging ATPase [EC:3.6.3.10]	-	GO:0015662//ATPase activity, coupled to transmembrane movement of ions, phosphorylative mechanism	GO:0006810//transport	gi|459371127|gb|EMG49015.1|/0/Putative Ca2+ ATPase [Candida maltosa Xu316]
orf19.2787	4.50672	0.919542	K15071|1|1e-17|90.1|ani:AN0358.2|recyclin-1	-	-	-	gi|238878812|gb|EEQ42450.1|/2.51149e-76/predicted protein [Candida albicans WO-1]
orf19.669	4.5062	0.941445	-	-	-	-	gi|68484463|ref|XP_713842.1|/0/potential pheromone-regulated membrane protein Prm1 [Candida albicans SC5314]
orf19.5491	4.50536	0.919184	-	-	-	-	gi|68489381|ref|XP_711483.1|/0/hypothetical protein CaO19.5491 [Candida albicans SC5314]
orf19.7558	4.50329	0.993121	K01509|1|0.0|713|pic:PICST_86369|adenosinetriphosphatase [EC:3.6.1.3];K12196|3|2e-53|210|cpw:CPC735_046220|vacuolar protein-sorting-associated protein 4	-	GO:0016462//pyrophosphatase activity;GO:0000166//nucleotide binding	-	gi|68473029|ref|XP_719320.1|/0/potential AAA family ATPase [Candida albicans SC5314]
orf19.7301	4.4987	0.948985	K06125|1|2e-54|213|ssl:SS1G_10405|4-hydroxybenzoate hexaprenyltransferase [EC:2.5.1.-]	-	-	-	gi|68492036|ref|XP_710204.1|/0/possible intact version of Cirt1 transposase [Candida albicans SC5314]
orf19.6583	4.4828	0.884679	-	-	-	-	gi|68469264|ref|XP_721419.1|/0/hypothetical protein CaO19.6583 [Candida albicans SC5314]
orf19.7555	4.48233	0.805157	-	-	-	-	gi|68473023|ref|XP_719317.1|/5.87524e-68/hypothetical protein CaO19.7555 [Candida albicans SC5314]
orf19.1757	4.47941	0.961945	K09202|1|1e-08|61.2|yli:YALI0E16973g|regulatory protein SWI5;K09238|2|6e-07|55.5|clu:CLUG_01494|metallothionein expression activator	GO:0044464//cell part	GO:0046914//transition metal ion binding	-	gi|68483323|ref|XP_714403.1|/0/potential zinc finger protein [Candida albicans SC5314]
orf19.1605	4.47435	0.914204	K10858|1|0.0|1374|cdu:CD36_23570|DNA mismatch repair protein PMS2	-	GO:0032559;GO:0003690//double-stranded DNA binding	GO:0006281//DNA repair	gi|238883807|gb|EEQ47445.1|/0/conserved hypothetical protein [Candida albicans WO-1]
orf19.1370	4.47155	0.868114	-	-	-	-	gi|68482828|ref|XP_714640.1|/1.02907e-146/hypothetical protein CaO19.8950 [Candida albicans SC5314]
orf19.3738	4.46736	0.909939	-	-	-	-	gi|68485259|ref|XP_713463.1|/5.79179e-22/hypothetical protein CaO19.11223 [Candida albicans SC5314]
orf19.553	4.45631	0.906802	K08158|1|1e-22|107|cgr:CAGL0H06017g|MFS transporter, DHA1 family, multidrug resistance protein;K00492|2|4e-22|105|afv:AFLA_131810|[EC:1.14.13.-];K08157|3|2e-19|96.7|pno:SNOG_01606|MFS transporter, DHA1 family, multidrug resistance protein	-	-	GO:0006810//transport	gi|68477065|ref|XP_717510.1|/0/potential dityrosine transporter [Candida albicans SC5314]
orf19.3926	4.45566	0.919955	K01166|1|0.0|687|cal:CaO19.3926|ribonuclease T2 [EC:3.1.27.1]	-	GO:0016892;GO:0003676//nucleic acid binding	-	gi|68467675|ref|XP_721996.1|/0/probable T2 family ribonuclease [Candida albicans SC5314]
orf19.756	4.45442	0.880221	K06005|1|0.0|1039|cal:CaO19.756|candidapepsin [EC:3.4.23.24];K06009|5|3e-49|196|vpo:Kpol_543p61|yapsin 1 [EC:3.4.23.41]	-	GO:0004175//endopeptidase activity	GO:0019538//protein metabolic process	gi|68484925|ref|XP_713601.1|/0/secretory aspartyl proteinase SAP7p [Candida albicans SC5314]
orf19.1825	4.45291	0.833416	-	-	-	-	gi|68490596|ref|XP_710885.1|/0/hypothetical protein CaO19.9384 [Candida albicans SC5314]
orf19.2169	4.45027	0.886027	-	-	-	-	gi|68479920|ref|XP_716010.1|/1.82511e-131/hypothetical protein CaO19.2169 [Candida albicans SC5314]
orf19.6518	4.44494	0.908728	K00128|1|0.0|752|lel:LELG_05045|aldehyde dehydrogenase (NAD+) [EC:1.2.1.3];K00129|2|0.0|685|cdu:CD36_00340|aldehyde dehydrogenase (NAD(P)+) [EC:1.2.1.5]	-	GO:0004030//aldehyde dehydrogenase [NAD(P)+] activity	GO:0044237//cellular metabolic process	gi|68469138|ref|XP_721356.1|/0/hypothetical protein CaO19.6518 [Candida albicans SC5314]
orf19.6110	4.44397	0.950085	-	-	-	-	gi|68473932|ref|XP_719069.1|/2.2789e-59/hypothetical protein CaO19.6110 [Candida albicans SC5314]
orf19.708	4.44356	0.889769	K15165|1|1e-05|52.0|pic:PICST_66803|mediator of RNA polymerase II transcription subunit 13, fungi type	GO:0005819//spindle	-	GO:0007010//cytoskeleton organization	gi|68488747|ref|XP_711799.1|/0/potential spindle pole body component [Candida albicans SC5314]
orf19.2285	4.44304	0.917809	-	-	GO:0051287//NAD binding;GO:0016810//hydrolase activity, acting on carbon-nitrogen (but not peptide) bonds;GO:0046914//transition metal ion binding	GO:0016458//gene silencing;GO:0035601//protein deacylation	gi|68482484|ref|XP_714874.1|/0/hypothetical protein CaO19.2285 [Candida albicans SC5314]
orf19.1780	4.42774	0.82384	K08257|1|1e-08|60.1|yli:YALI0D02563g|mannan endo-1,6-alpha-mannosidase [EC:3.2.1.101]	-	GO:0016798//hydrolase activity, acting on glycosyl bonds	-	gi|68483367|ref|XP_714425.1|/0/potential alpha-1,6-mannanase [Candida albicans SC5314]
orf19.4438	4.42287	0.930329	K09235|1|0.0|907|cal:CaO19.4438|zinc finger protein RME1	GO:0044464//cell part	GO:0046914//transition metal ion binding	-	gi|68483988|ref|XP_714084.1|/0/potential zinc finger protein [Candida albicans SC5314]
orf19.3210	4.41556	0.881515	-	-	-	-	gi|238882782|gb|EEQ46420.1|/1.16364e-78/conserved hypothetical protein [Candida albicans WO-1]
orf19.5606	4.41003	0.846183	-	-	-	-	gi|68473685|ref|XP_719167.1|/3.85412e-51/hypothetical protein CaO19.5606 [Candida albicans SC5314]
orf19.7419	4.37271	0.986517	K01522|1|6e-90|328|cal:CaO19.7419|bis(5'-adenosyl)-triphosphatase [EC:3.6.1.29]	-	GO:0003824//catalytic activity	-	gi|68479830|ref|XP_716084.1|/4.90452e-89/hypothetical protein CaO19.7419 [Candida albicans SC5314]
orf19.5542	4.37205	0.924137	K06005|1|0.0|830|cal:CaO19.5542|candidapepsin [EC:3.4.23.24]	-	GO:0004175//endopeptidase activity	GO:0019538//protein metabolic process	gi|68473561|ref|XP_719105.1|/0/secretory aspartyl proteinase SAP6p [Candida albicans SC5314]
orf19.547	4.36945	0.973309	K04799|1|0.0|665|cal:CaO19.547|flap endonuclease-1 [EC:3.-.-.-]	GO:0031981//nuclear lumen	GO:0043169//cation binding;GO:0003676//nucleic acid binding;GO:0004518//nuclease activity	GO:0006259//DNA metabolic process;GO:0033554//cellular response to stress	gi|74586103|sp|Q5A6K8.1|FEN1_CANAL/0/RecName: Full=Flap endonuclease 1; Short=FEN-1; AltName: Full=Flap structure-specific endonuclease 1
orf19.5399	4.34985	0.937125	K01186|1|7e-56|217|pic:PICST_3402|sialidase-1 [EC:3.2.1.18]	-	-	-	gi|68476249|ref|XP_717774.1|/0/hypothetical protein CaO19.5399 [Candida albicans SC5314]
orf19.2921	4.3454	0.978317	K01768|1|3e-06|52.8|pic:PICST_67704|adenylate cyclase [EC:4.6.1.1]	-	-	-	gi|68481067|ref|XP_715575.1|/0/hypothetical protein CaO19.2921 [Candida albicans SC5314]
orf19.7585	4.33248	0.916625	K01858|1|0.0|981|cal:CaO19.7585|myo-inositol-1-phosphate synthase [EC:5.5.1.4]	-	GO:0016872//intramolecular lyase activity	GO:0006020//inositol metabolic process;GO:0006644//phospholipid metabolic process	gi|68473083|ref|XP_719347.1|/0/potential inositol-1-phosphate synthase [Candida albicans SC5314]
orf19.5938	4.3273	0.970778	K10706|1|0.0|3787|cal:CaO19.13359|senataxin [EC:3.6.4.-]	-	GO:0017111//nucleoside-triphosphatase activity;GO:0004518//nuclease activity;GO:0032559	-	gi|68465577|ref|XP_723150.1|/0/potential nuclear RNA processing factor [Candida albicans SC5314]
orf19.5498	4.31212	0.915084	K12763|1|0.0|776|cdu:CD36_20730|protein SOK2	-	GO:0003676//nucleic acid binding;GO:0001071//nucleic acid binding transcription factor activity	GO:0006351//transcription, DNA-dependent	gi|68489344|ref|XP_711513.1|/0/potential DNA binding protein [Candida albicans SC5314]
orf19.5265	4.3103	0.94615	K10398|1|8e-59|228|tml:GSTUM_00008588001|kinesin family member 11	GO:0015630//microtubule cytoskeleton	GO:0003774//motor activity;GO:0032559	GO:0007017//microtubule-based process	gi|68479181|ref|XP_716396.1|/0/hypothetical protein CaO19.12730 [Candida albicans SC5314]
orf19.403	4.30842	0.957377	K06657|1|4e-117|419|cal:CaO19.403|G1/S-specific cyclin PLC2	-	GO:0019900//kinase binding	GO:0051726//regulation of cell cycle	gi|68488532|ref|XP_711891.1|/3.39451e-116/hypothetical protein CaO19.403 [Candida albicans SC5314]
orf19.359	4.30582	0.938446	K00799|1|2e-124|442|cdu:CD36_83610|glutathione S-transferase [EC:2.5.1.18]	-	GO:0016765//transferase activity, transferring alkyl or aryl (other than methyl) groups	-	gi|241953125|ref|XP_002419284.1|/2.13215e-123/glutathione S-transferase, putative [Candida dubliniensis CD36]
orf19.1215	4.30011	0.844835	-	-	-	-	gi|68491239|ref|XP_710576.1|/0/hypothetical protein CaO19.8803 [Candida albicans SC5314]
orf19.3637	4.29569	0.824363	-	-	-	-	gi|68483185|ref|XP_714526.1|/2.85938e-54/hypothetical protein CaO19.11119 [Candida albicans SC5314]
orf19.7453	4.29545	0.90372	K10731|1|6e-78|289|cdu:CD36_86610|DNA replication regulator SLD3	-	-	-	gi|68479893|ref|XP_716114.1|/5.37569e-118/hypothetical protein CaO19.7453 [Candida albicans SC5314]
orf19.427	4.29146	0.952479	K11118|1|0.0|2924|cal:CaO19.427|RAP1-interacting factor 1	-	-	-	gi|68480204|ref|XP_715912.1|/0/hypothetical protein CaO19.8057 [Candida albicans SC5314]
orf19.5992	4.29142	0.957322	K09246|1|2e-06|53.5|pgu:PGUG_00229|arginine metabolism regulation protein II;K01824|3|1e-05|50.8|nhe:NECHADRAFT_68940|cholestenol delta-isomerase [EC:5.3.3.5]	-	-	GO:0006351//transcription, DNA-dependent	gi|68465681|ref|XP_723202.1|/1.5584e-159/potential fungal zinc cluster transcription factor [Candida albicans SC5314]
orf19.1239	4.29093	0.852457	-	-	-	-	gi|68478770|ref|XP_716547.1|/8.76655e-156/hypothetical protein CaO19.1239 [Candida albicans SC5314]
orf19.1778	4.28675	0.824721	-	-	-	-	gi|68483363|ref|XP_714423.1|/2.20036e-46/hypothetical protein CaO19.1778 [Candida albicans SC5314]
orf19.4783	4.28187	0.898932	-	-	-	-	gi|68464783|ref|XP_723469.1|/0/hypothetical protein CaO19.4783 [Candida albicans SC5314]
orf19.3330.3	4.27151	0.830031	K00044|1|4e-10|62.0|pic:PICST_40664|estradiol 17beta-dehydrogenase [EC:1.1.1.62]	GO:0042579//microbody	GO:0005496//steroid binding;GO:0033764//steroid dehydrogenase activity, acting on the CH-OH group of donors, NAD or NADP as acceptor	GO:0008152//metabolic process	gi|238879366|gb|EEQ43004.1|/2.13568e-17/conserved hypothetical protein [Candida albicans WO-1]
orf19.1717	4.26896	0.858869	-	GO:0031224//intrinsic to membrane	-	GO:0051234//establishment of localization	gi|68468457|ref|XP_721788.1|/0/hypothetical protein CaO19.1717 [Candida albicans SC5314]
orf19.262	4.26833	0.910985	K06669|1|0.0|1635|cal:CaO19.262|structural maintenance of chromosome 3 (chondroitin sulfate proteoglycan 6)	GO:0043232	GO:0032559	GO:0006996//organelle organization	gi|68471834|ref|XP_719960.1|/0/potential nuclear cohesin complex SMC ATPase fragment [Candida albicans SC5314]
orf19.2957	4.26368	0.876424	-	-	-	-	gi|68468795|ref|XP_721456.1|/0/hypothetical protein CaO19.2957 [Candida albicans SC5314]
orf19.1679	4.25935	0.902042	-	-	-	-	gi|68468393|ref|XP_721756.1|/2.42755e-128/hypothetical protein CaO19.1679 [Candida albicans SC5314]
orf19.3374	4.2587	0.963211	-	-	-	-	gi|1169465|sp|Q07730.2|ECE1_CANAL/1.49101e-120/RecName: Full=Cell elongation protein 1
orf19.6670	4.2539	0.948242	K10751|1|0.0|875|cal:CaO19.6670|chromatin assembly factor 1 subunit B	-	-	-	gi|68489498|ref|XP_711422.1|/0/hypothetical protein CaO19.6670 [Candida albicans SC5314]
orf19.6569	4.25116	0.920973	-	-	-	GO:0006810//transport	gi|68469236|ref|XP_721405.1|/0/potential purine nucleoside permease [Candida albicans SC5314]
orf19.5179	4.24635	0.971273	K01175|1|4e-57|221|afm:AFUA_7G00110|[EC:3.1.-.-];K01046|3|3e-25|115|afm:AFUA_5G14150|triacylglycerol lipase [EC:3.1.1.3]	-	GO:0004091//carboxylesterase activity	GO:0006629//lipid metabolic process	gi|68477995|ref|XP_717001.1|/0/C. albicans secretory lipase 5 [Candida albicans SC5314]
orf19.1391	4.24508	0.922376	K10427|1|3e-83|306|cal:CaO19.1391|dynactin 5	-	GO:0003824//catalytic activity	-	gi|68482862|ref|XP_714657.1|/2.23568e-82/hypothetical protein CaO19.8969 [Candida albicans SC5314]
orf19.2941	4.24413	0.949095	K01210|1|1e-97|356|pic:PICST_57025|glucan 1,3-beta-glucosidase [EC:3.2.1.58];K01238|3|2e-43|176|afm:AFUA_6G12380|[EC:3.2.1.-]	-	GO:0043167//ion binding;GO:0008422//beta-glucosidase activity	GO:0044238//primary metabolic process	gi|68468763|ref|XP_721440.1|/2.42764e-142/potential glycosyl hydrolase [Candida albicans SC5314]
orf19.893	4.23271	0.918084	-	-	-	-	gi|68469767|ref|XP_721135.1|/0/hypothetical protein CaO19.8512 [Candida albicans SC5314]
orf19.258	4.22411	0.839002	-	-	-	-	gi|68471826|ref|XP_719956.1|/1.54895e-121/hypothetical protein CaO19.258 [Candida albicans SC5314]
orf19.4151	4.21008	0.954405	K13357|1|0.0|1265|cal:CaO19.4151|putative meiotic phospholipase SPO1 [EC:3.1.1.-]	-	GO:0016298//lipase activity	GO:0006644//phospholipid metabolic process	gi|68489667|ref|XP_711355.1|/0/hypothetical protein CaO19.4151 [Candida albicans SC5314]
orf19.1009	4.20799	0.834984	-	-	-	-	gi|68491879|ref|XP_710274.1|/3.74168e-38/hypothetical protein CaO19.1009 [Candida albicans SC5314]
orf19.2797	4.19287	0.860162	K01152|1|2e-95|349|pic:PICST_88383|type I restriction enzyme [EC:3.1.21.3];K01529|2|1e-69|263|afm:AFUA_7G05530|[EC:3.6.1.-];K14811|3|5e-08|58.9|sce:YGL078C|ATP-dependent RNA helicase DBP3 [EC:3.6.4.13];K14807|4|9e-08|58.2|sce:YNR038W|ATP-dependent RNA helicase DDX51/DBP6 [EC:3.6.4.13];K14808|5|8e-07|55.1|kla:KLLA0F24684g|ATP-dependent RNA helicase DDX54/DBP10 [EC:3.6.4.13]	-	GO:0016787//hydrolase activity;GO:0005488//binding	-	gi|68488833|ref|XP_711763.1|/0/hypothetical protein CaO19.10315 [Candida albicans SC5314]
orf19.5879	4.191	0.940372	K00039|1|6e-80|296|pic:PICST_53846|ribitol 2-dehydrogenase [EC:1.1.1.56];K06123|2|8e-50|196|cal:CaO19.6167|1-acylglycerone phosphate reductase [EC:1.1.1.101]	-	GO:0016616//oxidoreductase activity, acting on the CH-OH group of donors, NAD or NADP as acceptor	GO:0008152//metabolic process	gi|68465467|ref|XP_723095.1|/1.89815e-167/likely dihydroxyacetone phosphate reductase [Candida albicans SC5314]
orf19.2212	4.18495	0.947334	K12772|1|3e-06|49.3|yli:YALI0F24167g|sporulation-specific protein 4	-	-	-	gi|68480011|ref|XP_716052.1|/6.63797e-27/hypothetical protein CaO19.2212 [Candida albicans SC5314]
orf19.6950	4.17905	0.95402	K12386|1|1e-08|59.3|ctp:CTRG_05725|cystinosin	-	-	-	gi|68486794|ref|XP_712751.1|/2.87547e-149/hypothetical protein CaO19.6950 [Candida albicans SC5314]
orf19.1258	4.17523	0.907545	-	-	-	-	gi|68478808|ref|XP_716566.1|/3.98209e-44/hypothetical protein CaO19.1258 [Candida albicans SC5314]
orf19.2044	4.17212	0.936024	-	-	-	-	gi|68472599|ref|XP_719618.1|/0/potential secreted protein [Candida albicans SC5314]
orf19.3320	4.16374	0.814017	-	-	-	-	gi|68475053|ref|XP_718412.1|/7.84347e-36/hypothetical protein CaO19.10830 [Candida albicans SC5314]
orf19.7173	4.13955	0.947994	-	-	-	-	gi|68481708|ref|XP_715222.1|/0/hypothetical protein CaO19.7173 [Candida albicans SC5314]
orf19.7631	4.13422	0.928925	K10735|1|3e-118|423|cal:CaO19.7631|GINS complex subunit 4	GO:0043231//intracellular membrane-bounded organelle	-	GO:0006259//DNA metabolic process	gi|68473171|ref|XP_719391.1|/2.67703e-117/potential GINS DNA replication initiation complex subunit [Candida albicans SC5314]
orf19.245	4.1274	0.867316	K06663|1|0.0|873|cal:CaO19.245|DNA damage checkpoint protein	-	-	GO:0006259//DNA metabolic process	gi|68471802|ref|XP_719944.1|/0/hypothetical protein CaO19.245 [Candida albicans SC5314]
orf19.4251	4.12469	0.879423	K00681|1|4e-07|56.6|aor:AOR_1_316174|gamma-glutamyltranspeptidase [EC:2.3.2.2];K09245|2|1e-06|54.7|yli:YALI0D20394g|transcriptional activator protein UGA3;K09243|3|2e-06|54.3|ago:AGOS_AGL099C|transcriptional regulatory protein UME6;K09246|4|4e-06|53.1|ctp:CTRG_03264|arginine metabolism regulation protein II	GO:0043231//intracellular membrane-bounded organelle	GO:0046914//transition metal ion binding;GO:0001071//nucleic acid binding transcription factor activity	GO:0006351//transcription, DNA-dependent	gi|238882641|gb|EEQ46279.1|/0/conserved hypothetical protein [Candida albicans WO-1]
orf19.4208	4.12143	0.944857	K10873|1|0.0|894|cal:CaO19.4208|DNA repair and recombination protein RAD52	-	-	GO:0006259//DNA metabolic process	gi|68489792|ref|XP_711283.1|/0/potential dsDNA break repair annealing factor [Candida albicans SC5314]
orf19.3908	4.11707	0.883468	-	-	-	-	gi|68467639|ref|XP_721978.1|/3.85239e-121/hypothetical protein CaO19.11389 [Candida albicans SC5314]
orf19.3788	4.11566	0.884899	-	-	-	-	gi|68477444|ref|XP_717193.1|/5.86674e-110/hypothetical protein CaO19.3788 [Candida albicans SC5314]
orf19.3971	4.11466	0.897832	-	-	-	-	gi|68467765|ref|XP_722041.1|/2.07896e-142/hypothetical protein CaO19.11454 [Candida albicans SC5314]
orf19.5490	4.1073	0.93685	-	-	-	-	gi|68489379|ref|XP_711482.1|/7.78076e-36/hypothetical protein CaO19.5490 [Candida albicans SC5314]
orf19.1227	4.10456	0.92411	K09245|1|4e-10|63.5|pgu:PGUG_02878|transcriptional activator protein UGA3;K09243|5|1e-08|58.9|ago:AGOS_AGL099C|transcriptional regulatory protein UME6	-	-	GO:0006351//transcription, DNA-dependent	gi|68478746|ref|XP_716535.1|/2.64857e-84/potential fungal zinc cluster transcription factor [Candida albicans SC5314]
orf19.4435	4.08746	0.959413	-	GO:0044424//intracellular part	-	-	gi|74585161|sp|Q59WD5.1|STU1_CANAL/0/RecName: Full=Protein STU1
orf19.2547	4.0843	0.938501	-	-	GO:0003676//nucleic acid binding;GO:0004518//nuclease activity	-	gi|68475385|ref|XP_718215.1|/0/hypothetical protein CaO19.2547 [Candida albicans SC5314]
orf19.4643	4.07865	0.850724	-	-	-	-	gi|68466466|ref|XP_722715.1|/0/hypothetical protein CaO19.4643 [Candida albicans SC5314]
orf19.1120	4.07804	0.95003	-	-	-	-	gi|68490025|ref|XP_711172.1|/1.28893e-46/hypothetical protein CaO19.1120 [Candida albicans SC5314]
orf19.2611	4.0716	0.976006	K02542|1|0.0|1539|cal:CaO19.2611|minichromosome maintenance protein 6	GO:0043231//intracellular membrane-bounded organelle	GO:0003676//nucleic acid binding;GO:0032559	GO:0006259//DNA metabolic process	gi|68475306|ref|XP_718371.1|/0/hypothetical protein CaO19.10142 [Candida albicans SC5314]
orf19.3269	4.06297	0.981509	K00706|1|0.0|1657|cdu:CD36_25900|1,3-beta-glucan synthase [EC:2.4.1.34]	GO:0043234//protein complex;GO:0044464//cell part	GO:0035251//UDP-glucosyltransferase activity	GO:0006074//(1->3)-beta-D-glucan metabolic process	gi|2274776|dbj|BAA21540.1|/0/glucan synthase [Candida albicans]
orf19.2906	4.05911	0.915195	-	-	-	-	gi|238881260|gb|EEQ44898.1|/1.44565e-50/conserved hypothetical protein [Candida albicans WO-1]
orf19.2216	4.05763	0.968053	K11267|1|0.0|2437|cal:CaO19.9761|sister chromatid cohesion protein PDS5	-	-	-	gi|68480019|ref|XP_716056.1|/0/hypothetical protein CaO19.2216 [Candida albicans SC5314]
orf19.2674	4.05075	0.886055	-	-	-	-	gi|68470840|ref|XP_720427.1|/1.46017e-124/hypothetical protein CaO19.2674 [Candida albicans SC5314]
orf19.1606	4.04785	0.885422	-	-	-	-	gi|68468251|ref|XP_721685.1|/4.97107e-134/hypothetical protein CaO19.1606 [Candida albicans SC5314]
orf19.4616	4.04711	0.978014	K04802|1|2e-134|477|cal:CaO19.4616|proliferating cell nuclear antigen	GO:0043234//protein complex;GO:0043231//intracellular membrane-bounded organelle	GO:0003676//nucleic acid binding;GO:0030234//enzyme regulator activity	GO:0006260//DNA replication	gi|238881662|gb|EEQ45300.1|/1.42454e-133/proliferating cell nuclear antigen [Candida albicans WO-1]
orf19.5792	4.04493	0.932227	K08098|1|0.0|961|cal:CaO19.13214|phosphatidylinositol glycan, class Z [EC:2.4.1.-]	GO:0005789//endoplasmic reticulum membrane	GO:0016740//transferase activity	GO:0006497//protein lipidation	gi|74656300|sp|Q5A0L9.1|SMP3_CANAL/0/RecName: Full=GPI mannosyltransferase 4; AltName: Full=CaSMP3; AltName: Full=GPI mannosyltransferase IV; Short=GPI-MT-IV
orf19.2336	4.03532	0.86605	K15071|1|8e-17|85.9|ani:AN0358.2|recyclin-1	-	-	-	gi|68484214|ref|XP_713999.1|/2.4482e-104/hypothetical protein CaO19.9872 [Candida albicans SC5314]
orf19.6205	4.03337	0.966568	-	-	-	-	gi|68474172|ref|XP_718795.1|/3.14531e-62/hypothetical protein CaO19.6205 [Candida albicans SC5314]
orf19.6282	4.03004	0.848467	-	-	-	-	gi|68492025|ref|XP_710208.1|/0/hypothetical protein CaO19.3486 [Candida albicans SC5314]
orf19.584	4.01119	0.888421	K00428|1|1e-143|508|cdu:CD36_51470|cytochrome c peroxidase [EC:1.11.1.5]	-	GO:0005506//iron ion binding;GO:0004601//peroxidase activity	GO:0006950//response to stress;GO:0008152//metabolic process	gi|68483705|ref|XP_714211.1|/1.45459e-156/hypothetical protein CaO19.584 [Candida albicans SC5314]
orf19.2038	4.0095	0.865638	-	-	-	-	gi|68472587|ref|XP_719612.1|/0/hypothetical protein CaO19.9586 [Candida albicans SC5314]
orf19.2478	4.00193	0.892934	-	-	-	-	gi|68474916|ref|XP_718499.1|/0/hypothetical protein CaO19.2478 [Candida albicans SC5314]
orf19.3202	3.99788	0.83581	-	-	-	-	gi|68482708|ref|XP_714751.1|/0/hypothetical protein CaO19.10714 [Candida albicans SC5314]
orf19.1438	3.997	0.975978	K00356|1|1e-48|117|pic:PICST_58800|NADH dehydrogenase [EC:1.6.99.3];K00540|3|2e-40|103|dha:DEHA2E02574g|[EC:1.-.-.-]	-	GO:0005488//binding;GO:0003824//catalytic activity	GO:0008152//metabolic process	gi|68491807|ref|XP_710306.1|/9.73786e-97/potential oxidoreductase [Candida albicans SC5314]
orf19.2394	3.99281	0.871278	K15385|1|8e-27|120|nfi:NFIA_001560|aspyridone synthetase trans-acting enoyl reductase;K00344|5|5e-16|84.7|afm:AFUA_8G01420|NADPH2:quinone reductase [EC:1.6.5.5]	-	GO:0003824//catalytic activity;GO:0046914//transition metal ion binding	GO:0008152//metabolic process	gi|68485698|ref|XP_713227.1|/0/potential zinc-binding dehydrogenase [Candida albicans SC5314]
orf19.7362	3.99206	0.909003	-	-	-	-	gi|2498918|sp|P87024.1|SKN1_CANAL/0/RecName: Full=Beta-glucan synthesis-associated protein SKN1
orf19.2540	3.97925	0.959964	K11378|1|0.0|1187|cal:CaO19.2540|histone acetyltransferase SAS3 [EC:2.3.1.48]	GO:0043231//intracellular membrane-bounded organelle	GO:0003676//nucleic acid binding;GO:0004468//lysine N-acetyltransferase activity	-	gi|68475176|ref|XP_718306.1|/0/potential histone acetyltransferase Sas3 [Candida albicans SC5314]
orf19.4662	3.9724	0.955038	K09265|1|0.0|747|cal:CaO19.12132|MADS-box transcription factor, other eukaryote	-	GO:0003677//DNA binding	GO:0006351//transcription, DNA-dependent	gi|68466209|ref|XP_722879.1|/0/hypothetical protein CaO19.12132 [Candida albicans SC5314]
orf19.3208	3.96529	0.846679	K08192|1|8e-178|622|dha:DEHA2C12276g|MFS transporter, ACS family, allantoate permease	-	-	GO:0006810//transport	gi|68482720|ref|XP_714757.1|/0/hypothetical protein CaO19.10720 [Candida albicans SC5314]
orf19.4354	3.96307	0.964504	K02540|1|0.0|1582|cal:CaO19.11832|minichromosome maintenance protein 2	GO:0043231//intracellular membrane-bounded organelle	GO:0003676//nucleic acid binding;GO:0032559	GO:0006259//DNA metabolic process	gi|238879844|gb|EEQ43482.1|/0/DNA replication licensing factor MCM2 [Candida albicans WO-1]
orf19.5362	3.96013	0.9322	K15340|1|1e-12|73.9|smp:SMAC_00330|DNA cross-link repair 1A protein	-	GO:0003824//catalytic activity	-	gi|68477703|ref|XP_717164.1|/0/hypothetical protein CaO19.5362 [Candida albicans SC5314]
orf19.4725	3.95028	0.950388	K06648|1|0.0|1296|cal:CaO19.4725|regulatory protein SWI6;K06867|5|1e-31|137|spo:SPBC336.12c|	-	GO:0003676//nucleic acid binding;GO:0001071//nucleic acid binding transcription factor activity	GO:0006351//transcription, DNA-dependent	gi|68464669|ref|XP_723412.1|/0/potential transcriptional co-activator [Candida albicans SC5314]
orf19.7082	3.94992	0.974245	K15111|1|5e-155|545|cal:CaO19.7082|solute carrier family 25 (mitochondrial S-adenosylmethionine transporter), member 26	GO:0019866//organelle inner membrane;GO:0031224//intrinsic to membrane;GO:0043231//intracellular membrane-bounded organelle	-	GO:0006810//transport	gi|68471193|ref|XP_720373.1|/4.62359e-154/potential mitochondrial S-adenosylmethionine transporter [Candida albicans SC5314]
orf19.2962	3.92887	0.915222	-	-	-	-	gi|68468805|ref|XP_721461.1|/1.66258e-123/hypothetical protein CaO19.2962 [Candida albicans SC5314]
orf19.2517	3.92586	0.931016	K01426|1|3e-58|225|mgr:MGG_14363|amidase [EC:3.5.1.4];K08856|2|1e-43|177|ani:AN1476.2|serine/threonine kinase 16 [EC:2.7.11.1];K00492|3|8e-18|91.3|afv:AFLA_131810|[EC:1.14.13.-];K08157|4|1e-13|77.8|pno:SNOG_01606|MFS transporter, DHA1 family, multidrug resistance protein	-	-	GO:0006810//transport	gi|68475134|ref|XP_718285.1|/0/potential ion transporter [Candida albicans SC5314]
orf19.5517	3.9215	0.936905	K00002|1|0.0|681|cal:CaO19.12963|alcohol dehydrogenase (NADP+) [EC:1.1.1.2]	-	GO:0046914//transition metal ion binding;GO:0004033//aldo-keto reductase (NADP) activity	GO:0008152//metabolic process	gi|68473282|ref|XP_719199.1|/0/hypothetical protein CaO19.12963 [Candida albicans SC5314]
orf19.6949	3.91162	0.912058	-	-	-	-	gi|238880781|gb|EEQ44419.1|/7.49837e-39/conserved hypothetical protein [Candida albicans WO-1]
orf19.3781	3.91089	0.893622	K12386|1|2e-89|329|ctp:CTRG_05725|cystinosin	-	-	-	gi|68477430|ref|XP_717186.1|/0/hypothetical protein CaO19.3781 [Candida albicans SC5314]
orf19.3042	3.90723	0.903555	-	-	-	-	gi|68468963|ref|XP_721540.1|/6.98681e-158/hypothetical protein CaO19.3042 [Candida albicans SC5314]
orf19.5259	3.90633	0.940124	-	-	-	-	gi|68479169|ref|XP_716390.1|/5.51161e-134/hypothetical protein CaO19.12724 [Candida albicans SC5314]
orf19.5596	3.90096	0.850504	-	-	-	-	gi|74680130|sp|Q5ABV4.1|ASA1_CANAL/0/RecName: Full=ASTRA-associated protein 1
orf19.2035	3.89924	0.899235	-	-	-	-	gi|68472581|ref|XP_719609.1|/2.06618e-130/hypothetical protein CaO19.9583 [Candida albicans SC5314]
orf19.4577	3.89914	0.928237	-	-	-	-	gi|68466039|ref|XP_722794.1|/0/hypothetical protein CaO19.12046 [Candida albicans SC5314]
orf19.2873	3.89899	0.934071	K03164|1|0.0|2511|cal:CaO19.2873|DNA topoisomerase II [EC:5.99.1.3]	GO:0043232	GO:0001071//nucleic acid binding transcription factor activity;GO:0003916//DNA topoisomerase activity;GO:0032559	GO:0006259//DNA metabolic process;GO:0006351//transcription, DNA-dependent	gi|68480866|ref|XP_715586.1|/0/DNA topoisomerase II [Candida albicans SC5314]
orf19.3305	3.89859	0.940042	-	GO:0043231//intracellular membrane-bounded organelle	GO:0046914//transition metal ion binding;GO:0001071//nucleic acid binding transcription factor activity	GO:0006351//transcription, DNA-dependent	gi|68475023|ref|XP_718397.1|/0/potential fungal zinc cluster transcription factor [Candida albicans SC5314]
orf19.2907	3.89509	0.902675	-	-	-	-	gi|68481041|ref|XP_715562.1|/4.43525e-90/hypothetical protein CaO19.2907 [Candida albicans SC5314]
orf19.2813	3.89355	0.981537	-	-	-	-	gi|68491565|ref|XP_710412.1|/4.19739e-13/hypothetical protein CaO19.12660 [Candida albicans SC5314]
orf19.7065	3.88971	0.927082	K10734|1|8e-100|361|cal:CaO19_7065|GINS complex subunit 3	GO:0043231//intracellular membrane-bounded organelle	-	GO:0006259//DNA metabolic process	gi|68471161|ref|XP_720357.1|/6.62423e-99/potential GINS DNA replication initiation complex subunit [Candida albicans SC5314]
orf19.3322	3.88591	0.973914	K01520|1|1e-84|310|cal:CaO19.10832|dUTP pyrophosphatase [EC:3.6.1.23]	-	GO:0043169//cation binding;GO:0047429//nucleoside-triphosphate diphosphatase activity	GO:0009211	gi|353558786|sp|C4YFC7.1|DUT_CANAW/9.83274e-84/RecName: Full=Deoxyuridine 5'-triphosphate nucleotidohydrolase; Short=dUTPase; AltName: Full=dUTP pyrophosphatase
orf19.6654	3.88591	0.984921	-	-	-	-	gi|238882734|gb|EEQ46372.1|/0/conserved hypothetical protein [Candida albicans WO-1]
orf19.2952	3.88519	0.960184	K01210|1|0.0|887|cal:CaO19.10469|glucan 1,3-beta-glucosidase [EC:3.2.1.58]	-	GO:0043167//ion binding;GO:0008422//beta-glucosidase activity	GO:0044238//primary metabolic process	gi|238879258|gb|EEQ42896.1|/0/hypothetical protein CAWG_01120 [Candida albicans WO-1]
orf19.7337	3.8826	0.961202	-	-	-	-	gi|68479074|ref|XP_716471.1|/0/hypothetical protein CaO19.7337 [Candida albicans SC5314]
orf19.7568	3.88233	0.958615	K12772|1|1e-124|444|cal:CaO19.7568|sporulation-specific protein 4	-	-	-	gi|68473049|ref|XP_719330.1|/1.17875e-123/hypothetical protein CaO19.7568 [Candida albicans SC5314]
orf19.7051	3.8788	0.958175	K06287|1|5e-118|422|cal:CaO19.7051|septum formation protein	GO:0044424//intracellular part	-	-	gi|68471133|ref|XP_720343.1|/4.88564e-117/hypothetical protein CaO19.7051 [Candida albicans SC5314]
orf19.5342	3.86623	0.985581	-	-	GO:0003824//catalytic activity	GO:0009117//nucleotide metabolic process	gi|68477665|ref|XP_717145.1|/0/hypothetical protein CaO19.5342 [Candida albicans SC5314]
orf19.1447	3.86517	0.885752	K10352|1|2e-07|56.6|cgr:CAGL0J00693g|myosin heavy chain;K12575|3|7e-06|51.6|cgr:CAGL0I10901g|kinetochore protein SLK19;K09291|4|1e-05|51.2|cgr:CAGL0G02497g|nucleoprotein TPR	-	-	-	gi|68466603|ref|XP_722497.1|/0/hypothetical protein CaO19.1447 [Candida albicans SC5314]
orf19.217	3.86459	0.935474	K09467|1|2e-07|56.2|zro:ZYRO0E08426g|zinc-finger protein CreA/MIG	-	GO:0005488//binding	-	gi|68487081|ref|XP_712601.1|/4.30132e-144/potential zinc finger protein [Candida albicans SC5314]
orf19.5023	3.85587	0.940482	K08192|1|3e-66|252|pic:PICST_29740|MFS transporter, ACS family, allantoate permease	-	-	GO:0006810//transport	gi|68467357|ref|XP_722340.1|/0/hypothetical protein CaO19.12490 [Candida albicans SC5314]
orf19.2771	3.85497	0.981702	K08773|1|0.0|1875|cal:CaO19.10287|RalA-binding protein 1	GO:0044464//cell part	GO:0008047//enzyme activator activity;GO:0005543//phospholipid binding	GO:0023052//signaling;GO:0009987//cellular process	gi|68471028|ref|XP_720521.1|/0/hypothetical protein CaO19.2771 [Candida albicans SC5314]
orf19.564	3.85486	0.880882	K10405|1|0.0|1163|cdu:CD36_23490|kinesin family member C1	GO:0015630//microtubule cytoskeleton	GO:0003774//motor activity;GO:0032559	GO:0007017//microtubule-based process	gi|27085395|gb|AAN85373.1|/0/KAR3 [Candida albicans]
orf19.5663	3.85261	0.97141	K14347|1|0.0|820|cal:CaO19.13108|solute carrier family 10 (sodium/bile acid cotransporter), member 7	GO:0044464//cell part	GO:0005343//organic acid:sodium symporter activity	GO:0030001//metal ion transport	gi|68485427|ref|XP_713391.1|/0/hypothetical protein CaO19.13108 [Candida albicans SC5314]
orf19.5353	3.85005	0.926972	-	-	-	-	gi|68477687|ref|XP_717156.1|/2.25584e-164/hypothetical protein CaO19.5353 [Candida albicans SC5314]
orf19.7320	3.84832	0.904766	K01175|1|1e-48|193|afm:AFUA_7G00110|[EC:3.1.-.-];K01046|3|2e-25|116|afm:AFUA_5G14150|triacylglycerol lipase [EC:3.1.1.3]	-	GO:0004091//carboxylesterase activity	GO:0006629//lipid metabolic process	gi|68479040|ref|XP_716454.1|/0/C. albicans secretory lipase 7 [Candida albicans SC5314]
orf19.2508	3.8455	0.8357	-	-	-	-	gi|68474803|ref|XP_718609.1|/9.55586e-163/hypothetical protein CaO19.10044 [Candida albicans SC5314]
orf19.2738	3.84527	0.917726	K14708|1|0.0|1243|cal:CaO19.10252|solute carrier family 26 (sodium-independent sulfate anion transporter), member 11	GO:0031224//intrinsic to membrane	GO:0015291//secondary active transmembrane transporter activity	GO:0015698//inorganic anion transport	gi|68470962|ref|XP_720488.1|/0/potential high-affinity sulfate transporter fragment [Candida albicans SC5314]
orf19.7621	3.84304	0.912828	K11134|1|0.0|1659|cal:CaO19.7621|telomere length regulation protein	-	-	-	gi|68473153|ref|XP_719382.1|/0/hypothetical protein CaO19.7621 [Candida albicans SC5314]
orf19.1066	3.83862	0.938776	-	-	-	-	gi|68484807|ref|XP_713715.1|/9.78531e-148/hypothetical protein CaO19.8668 [Candida albicans SC5314]
orf19.3440	3.83507	0.92078	K07034|1|2e-62|238|pgu:PGUG_02480|	GO:0044464//cell part	-	-	gi|68478491|ref|XP_716747.1|/3.09886e-153/possible transmembrane sensor/transporter [Candida albicans SC5314]
orf19.3761	3.83493	0.965329	K02212|1|0.0|1630|cal:CaO19.3761|minichromosome maintenance protein 4 (cell division control protein 54)	-	GO:0017111//nucleoside-triphosphatase activity;GO:0003676//nucleic acid binding;GO:0032559	GO:0006259//DNA metabolic process;GO:0009207	gi|68490792|ref|XP_710791.1|/0/hypothetical protein CaO19.3761 [Candida albicans SC5314]
orf19.3885	3.82908	0.888036	-	-	GO:0016407//acetyltransferase activity	-	gi|68485123|ref|XP_713551.1|/0/potential N-acetyl tranferase (GNAT family) [Candida albicans SC5314]
orf19.2721	3.82505	0.972126	-	-	-	GO:0009987//cellular process	gi|238881569|gb|EEQ45207.1|/0/conserved hypothetical protein [Candida albicans WO-1]
orf19.4509	3.82299	0.817346	-	-	-	-	gi|68486400|ref|XP_712935.1|/5.19693e-56/hypothetical LPF family protein 28 [Candida albicans SC5314]
orf19.6918	3.82278	0.909113	-	-	-	-	gi|68487323|ref|XP_712489.1|/0/hypothetical protein CaO19.6918 [Candida albicans SC5314]
orf19.5487	3.82208	0.965632	K02209|1|0.0|1409|cal:CaO19.12942|minichromosome maintenance protein 5 (cell division control protein 46)	GO:0043231//intracellular membrane-bounded organelle	GO:0017111//nucleoside-triphosphatase activity;GO:0003676//nucleic acid binding;GO:0032559	GO:0006259//DNA metabolic process;GO:0009207	gi|68489324|ref|XP_711503.1|/0/hypothetical protein CaO19.12942 [Candida albicans SC5314]
orf19.4510	3.81432	0.938446	-	-	-	-	gi|68486402|ref|XP_712936.1|/0/hypothetical LPF family protein 29 [Candida albicans SC5314]
orf19.7088	3.8136	0.971163	K07566|1|0.0|755|cal:CaO19_7088|tRNA threonylcarbamoyladenosine biosynthesis protein	-	-	-	gi|68471205|ref|XP_720379.1|/0/hypothetical protein CaO19.7088 [Candida albicans SC5314]
orf19.3232	3.80967	0.816411	K11369|1|4e-48|191|ani:AN3929.2|retrograde regulation protein 2;K13336|2|2e-46|186|afv:AFLA_048740|peroxin-3;K15361|3|2e-40|166|cim:CIMG_09192|WD repeat-containing protein 48;K03448|4|4e-36|152|cpw:CPC735_001260|MFS transporter, ACS family, pantothenate transporter	-	-	GO:0006810//transport	gi|68475965|ref|XP_717923.1|/0/hypothetical protein CaO19.3232 [Candida albicans SC5314]
orf19.609	3.80657	0.833801	-	-	-	-	gi|68483755|ref|XP_714236.1|/3.95264e-32/hypothetical protein CaO19.609 [Candida albicans SC5314]
orf19.7105	3.80583	0.86206	K06652|1|2e-14|80.9|ago:AGOS_AEL104W|cyclin-dependent kinase inhibitor FAR1	-	GO:0046914//transition metal ion binding	-	gi|68471239|ref|XP_720396.1|/0/hypothetical protein CaO19.7105 [Candida albicans SC5314]
orf19.3526	3.80374	0.976666	K08150|1|0.0|945|cal:CaO19.3526|MFS transporter, SP family, solute carrier family 2 (myo-inositol transporter), member 13	GO:0031224//intrinsic to membrane	GO:0022857//transmembrane transporter activity	GO:0006810//transport	gi|68482255|ref|XP_714885.1|/0/potential myo-inositol transporter [Candida albicans SC5314]
orf19.1774	3.80323	0.929998	K00122|1|0.0|456|cal:CaO19.1117|formate dehydrogenase [EC:1.2.1.2]	-	GO:0016620//oxidoreductase activity, acting on the aldehyde or oxo group of donors, NAD or NADP as acceptor;GO:0016614//oxidoreductase activity, acting on CH-OH group of donors;GO:0000166//nucleotide binding	GO:0008152//metabolic process	gi|238883861|gb|EEQ47499.1|/0/formate dehydrogenase [Candida albicans WO-1]
orf19.4231	3.80271	0.880084	K14443|1|3e-43|175|lel:LELG_03995|protein Tob/BTG	-	-	-	gi|68470328|ref|XP_720668.1|/0/hypothetical protein CaO19.11706 [Candida albicans SC5314]
orf19.1434	3.79729	0.914011	K03507|1|0.0|1367|cal:CaO19.1434|DNA replication regulator DPB11	GO:0044464//cell part	-	-	gi|68342541|ref|XP_710147.1|/0/hypothetical protein CaO19.1434 [Candida albicans SC5314]
orf19.810	3.79133	0.930439	K15271|1|0.0|2241|cal:CaO19.810|ATP-dependent DNA helicase HFM1/MER3 [EC:3.6.4.12]	-	GO:0032559;GO:0042623//ATPase activity, coupled	-	gi|68469609|ref|XP_721056.1|/0/hypothetical protein CaO19.8430 [Candida albicans SC5314]
orf19.7364	3.78686	0.846624	K00485|1|9e-171|599|pic:PICST_30092|dimethylaniline monooxygenase (N-oxide forming) [EC:1.14.13.8]	-	GO:0000166//nucleotide binding;GO:0050662//coenzyme binding;GO:0016709//oxidoreductase activity, acting on paired donors, with incorporation or reduction of molecular oxygen, NAD(P)H as one donor, and incorporation of one atom of oxygen	GO:0008152//metabolic process	gi|68478673|ref|XP_716605.1|/0/hypothetical protein CaO19.7364 [Candida albicans SC5314]
orf19.6824	3.78517	0.908811	-	-	-	-	gi|68472243|ref|XP_719917.1|/6.05136e-170/potential helix-loop-helix DNA binding protein [Candida albicans SC5314]
orf19.929	3.78384	0.876121	-	-	-	-	gi|68478173|ref|XP_716828.1|/0/hypothetical protein CaO19.8544 [Candida albicans SC5314]
orf19.7455	3.77189	0.879726	-	-	-	-	gi|68479897|ref|XP_716116.1|/0/hypothetical protein CaO19.7455 [Candida albicans SC5314]
orf19.3581	3.76978	0.936134	K10752|1|0.0|785|cdu:CD36_19970|histone-binding protein RBBP4	-	-	-	gi|68482238|ref|XP_715003.1|/0/hypothetical protein CaO19.11065 [Candida albicans SC5314]
orf19.234	3.76615	0.952424	K04518|1|3e-174|610|cal:CaO19.234|prephenate dehydratase [EC:4.2.1.51]	-	GO:0016836//hydro-lyase activity	GO:0006558//L-phenylalanine metabolic process	gi|68471780|ref|XP_719933.1|/2.80702e-173/likely prephenate dehydratase [Candida albicans SC5314]
orf19.2638	3.76437	0.870535	-	-	-	-	gi|68488163|ref|XP_712042.1|/3.74693e-143/hypothetical protein CaO19.10161 [Candida albicans SC5314]
orf19.4194	3.76357	0.983077	K03143|1|7e-180|629|cal:CaO19.4194|transcription initiation factor TFIIH subunit 3	GO:0000441//SSL2-core TFIIH complex	-	GO:0006259//DNA metabolic process;GO:0006351//transcription, DNA-dependent	gi|68489766|ref|XP_711270.1|/6.57669e-179/hypothetical protein CaO19.11671 [Candida albicans SC5314]
orf19.6001	3.7606	0.942106	K06005|1|0.0|728|cal:CaO19.13422|candidapepsin [EC:3.4.23.24]	-	GO:0004175//endopeptidase activity	GO:0019538//protein metabolic process	gi|68465697|ref|XP_723210.1|/0/secretory aspartyl proteinase SAP3p [Candida albicans SC5314]
orf19.4964	3.76047	0.948572	K13106|1|3e-121|433|cal:CaO19.12429|pre-mRNA-splicing factor CWC26	-	-	-	gi|74587568|sp|Q5AL13.1|CWC26_CANAL/2.71747e-120/RecName: Full=Pre-mRNA-splicing factor CWC26
orf19.25	3.7585	0.981206	K15445|1|6e-169|592|cal:CaO19.7696|tRNA (guanine9-N1)-methyltransferase [EC:2.1.1.221]	-	GO:0016741	GO:0006730//one-carbon metabolic process	gi|68488647|ref|XP_711832.1|/5.70746e-168/likely tRNA guanine methyltransferase [Candida albicans SC5314]
orf19.183	3.73948	0.94926	K01693|1|2e-123|440|cal:CaO19.183|imidazoleglycerol-phosphate dehydratase [EC:4.2.1.19]	GO:0044424//intracellular part	GO:0016836//hydro-lyase activity	GO:0006547//histidine metabolic process	gi|238882261|gb|EEQ45899.1|/1.87858e-122/imidazoleglycerol-phosphate dehydratase [Candida albicans WO-1]
orf19.5140	3.73656	0.876947	-	-	-	-	gi|68477919|ref|XP_716963.1|/0/hypothetical LPF family protein 34 [Candida albicans SC5314]
orf19.6570	3.73212	0.868857	-	-	-	GO:0006810//transport	gi|68469238|ref|XP_721406.1|/0/purine nucleoside permease [Candida albicans SC5314]
orf19.2784	3.72791	0.892631	-	-	-	-	gi|68488803|ref|XP_711748.1|/6.94704e-163/hypothetical protein CaO19.10300 [Candida albicans SC5314]
orf19.444	3.7267	0.927302	K13201|1|1e-15|81.3|lel:LELG_02781|nucleolysin TIA-1/TIAR	-	GO:0005488//binding	-	gi|68480240|ref|XP_715929.1|/2.38532e-69/potential RNA binding protein [Candida albicans SC5314]
orf19.2012	3.72498	0.988361	K12580|1|4e-97|355|pgu:PGUG_04933|CCR4-NOT transcription complex subunit 3	GO:0043231//intracellular membrane-bounded organelle	-	-	gi|241950719|ref|XP_002418082.1|/0/mRNA deadenylase and CCR4-NOT complex subunit Not3p, putative [Candida dubliniensis CD36]
orf19.3621	3.71403	0.837543	-	-	-	-	gi|68483256|ref|XP_714463.1|/8.29367e-112/hypothetical protein CaO19.3621 [Candida albicans SC5314]
orf19.6072	3.71149	0.901134	-	-	-	-	gi|68473862|ref|XP_719034.1|/0/hypothetical protein CaO19.6072 [Candida albicans SC5314]
orf19.3376	3.71113	0.871774	-	-	-	-	gi|238881507|gb|EEQ45145.1|/1.0875e-50/conserved hypothetical protein [Candida albicans WO-1]
orf19.5469	3.70795	0.981619	-	-	-	-	gi|68476381|ref|XP_717840.1|/0/hypothetical protein CaO19.5469 [Candida albicans SC5314]
orf19.2287	3.70711	0.956937	K03000|1|2e-67|252|cal:CaO19.9827|DNA-directed RNA polymerase I subunit RPA12	-	GO:0034062//RNA polymerase activity;GO:0046914//transition metal ion binding;GO:0003676//nucleic acid binding	GO:0010467//gene expression	gi|238883622|gb|EEQ47260.1|/2.45808e-66/DNA-directed RNA polymerase I 13.7 kDa polypeptide [Candida albicans WO-1]
orf19.7521	3.70678	0.93341	-	-	-	-	gi|68474610|ref|XP_718678.1|/0/hypothetical protein CaO19.7521 [Candida albicans SC5314]
orf19.6551.1	3.69951	0.929943	K07973|1|9e-41|104|cdu:CD36_71570|guanine nucleotide-binding protein subunit gamma, other	GO:0031234//extrinsic to internal side of plasma membrane	GO:0060089	GO:0007166//cell surface receptor signaling pathway	gi|238883332|gb|EEQ46970.1|/2.16972e-40/predicted protein [Candida albicans WO-1]
orf19.496	3.69617	0.930659	K08736|1|5e-56|219|pte:PTT_17141|DNA mismatch repair protein MSH3;K08735|3|1e-53|211|ctp:CTRG_03762|DNA mismatch repair protein MSH2	-	GO:0032559;GO:0003690//double-stranded DNA binding	GO:0006281//DNA repair	gi|68476941|ref|XP_717448.1|/0/hypothetical protein CaO19.8126 [Candida albicans SC5314]
orf19.5929	3.69192	0.96998	-	-	-	-	gi|68465559|ref|XP_723141.1|/1.21049e-163/hypothetical protein CaO19.5929 [Candida albicans SC5314]
orf19.6921	3.69139	0.885697	K15217|1|8e-15|82.0|pic:PICST_29938|RNA polymerase I-specific transcription initiation factor RRN5	-	-	-	gi|77022638|ref|XP_888763.1|/0/hypothetical protein CaJ7_0155 [Candida albicans SC5314]
orf19.3466	3.69021	0.854851	K02427|1|6e-57|220|pic:PICST_83107|23S rRNA (uridine2552-2'-O)-methyltransferase [EC:2.1.1.166];K15508|4|3e-16|85.5|ppa:PAS_chr1-1_0182|21S rRNA (uridine2791-2'-O)-methyltransferase [EC:2.1.1.168]	-	GO:0005488//binding;GO:0016741	GO:0006730//one-carbon metabolic process	gi|68487185|ref|XP_712536.1|/0/hypothetical protein CaO19.10970 [Candida albicans SC5314]
orf19.2251	3.68678	0.915937	K01488|1|0.0|723|cal:CaO19.2251|adenosine deaminase [EC:3.5.4.4]	-	GO:0016814//hydrolase activity, acting on carbon-nitrogen (but not peptide) bonds, in cyclic amidines	GO:0009127//purine nucleoside monophosphate biosynthetic process	gi|68482418|ref|XP_714841.1|/0/potential adenine aminohydrolase [Candida albicans SC5314]
orf19.6784	3.68311	0.944775	-	-	-	-	gi|68472169|ref|XP_719880.1|/2.31451e-112/possible secreted protein [Candida albicans SC5314]
orf19.5287	3.67808	0.960074	K09291|1|4e-06|52.4|cdu:CD36_41050|nucleoprotein TPR;K10858|2|9e-06|51.2|dha:DEHA2A10868g|DNA mismatch repair protein PMS2	-	-	-	gi|68491683|ref|XP_710368.1|/0/hypothetical protein CaO19.5287 [Candida albicans SC5314]
orf19.588	3.67557	0.957927	-	GO:0043231//intracellular membrane-bounded organelle	GO:0015002//heme-copper terminal oxidase activity	-	gi|68480728|ref|XP_715744.1|/5.03558e-59/hypothetical protein CaO19.1982 [Candida albicans SC5314]
orf19.5257	3.67522	0.969567	K04718|1|0.0|1062|cal:CaO19.12722|sphingosine kinase [EC:2.7.1.91]	-	GO:0016301//kinase activity	GO:0007186//G-protein coupled receptor signaling pathway;GO:0006796//phosphate-containing compound metabolic process	gi|68479165|ref|XP_716388.1|/0/potential sphingoid long chain base kinase [Candida albicans SC5314]
orf19.6972	3.67278	0.900528	K00706|1|5e-122|437|pic:PICST_43247|1,3-beta-glucan synthase [EC:2.4.1.34]	-	-	-	gi|68482737|ref|XP_714678.1|/0/potential chromatin-binding protein [Candida albicans SC5314]
orf19.1135	3.67183	0.979748	K10884|1|0.0|1408|cal:CaO19.1135|ATP-dependent DNA helicase 2 subunit 1	-	GO:0003676//nucleic acid binding;GO:0003678//DNA helicase activity	GO:0000726	gi|68486045|ref|XP_713039.1|/0/potential Ku DNA binding protein subunit [Candida albicans SC5314]
orf19.5532	3.67077	0.937153	-	-	-	-	gi|68473310|ref|XP_719213.1|/1.60231e-65/hypothetical protein CaO19.12978 [Candida albicans SC5314]
orf19.6266	3.67028	0.968136	-	-	-	-	gi|68474288|ref|XP_718853.1|/0/hypothetical protein CaO19.6266 [Candida albicans SC5314]
orf19.3780	3.6672	0.876837	-	-	-	-	gi|68477428|ref|XP_717185.1|/0/hypothetical protein CaO19.3780 [Candida albicans SC5314]
orf19.5010	3.66473	0.93641	K14191|1|0.0|646|cal:CaO19.5010|18S rRNA (adenine1779-N6/adenine1780-N6)-dimethyltransferase [EC:2.1.1.183]	-	GO:0008649//rRNA methyltransferase activity;GO:0003676//nucleic acid binding;GO:0008170//N-methyltransferase activity	GO:0006730//one-carbon metabolic process;GO:0000154//rRNA modification	gi|68467333|ref|XP_722328.1|/0/likely dimethyladenosine transferase [Candida albicans SC5314]
orf19.2258	3.66464	0.95446	-	-	-	-	gi|68482432|ref|XP_714848.1|/0/hypothetical protein CaO19.2258 [Candida albicans SC5314]
orf19.2087	3.661	0.930081	K11401|1|0.0|705|cal:CaO19.2087|histone acetyltransferase SAS2 [EC:2.3.1.48]	GO:0043231//intracellular membrane-bounded organelle	GO:0046914//transition metal ion binding;GO:0004468//lysine N-acetyltransferase activity	-	gi|68472677|ref|XP_719657.1|/0/hypothetical protein CaO19.9634 [Candida albicans SC5314]
orf19.3592	3.6604	0.948022	K09523|1|0.0|1089|cal:CaO19.3592|DnaJ homolog subfamily C member 3	-	GO:0005515//protein binding	GO:0044267//cellular protein metabolic process	gi|68483208|ref|XP_714439.1|/0/potential DnaJ-like co-chaperone Jem1p [Candida albicans SC5314]
orf19.4936	3.65681	0.898547	-	-	-	-	gi|68467199|ref|XP_722261.1|/3.48654e-52/hypothetical protein CaO19.12402 [Candida albicans SC5314]
orf19.2395	3.65345	0.893924	K12765|1|0.0|1047|cal:CaO19.2395|meiosis induction protein kinase IME2/SME1 [EC:2.7.11.1]	-	GO:0004672//protein kinase activity;GO:0032559	GO:0006464//cellular protein modification process	gi|68485593|ref|XP_713279.1|/0/likely protein kinase [Candida albicans SC5314]
orf19.4070	3.65321	0.829398	-	-	-	-	gi|68483582|ref|XP_714244.1|/9.30879e-158/hypothetical protein CaO19.4070 [Candida albicans SC5314]
orf19.3626	3.64417	0.813797	-	-	GO:0016884//carbon-nitrogen ligase activity, with glutamine as amido-N-donor	GO:0006528//asparagine metabolic process	gi|238883726|gb|EEQ47364.1|/0/conserved hypothetical protein [Candida albicans WO-1]
orf19.5071	3.64237	0.89885	-	-	GO:0005488//binding	-	gi|68476633|ref|XP_717609.1|/0/hypothetical protein CaO19.5071 [Candida albicans SC5314]
orf19.2365	3.64202	0.936575	K02324|1|0.0|4380|cal:CaO19.2365|DNA polymerase epsilon subunit 1 [EC:2.7.7.7]	GO:0043231//intracellular membrane-bounded organelle	GO:0046914//transition metal ion binding;GO:0003676//nucleic acid binding;GO:0034061	GO:0006259//DNA metabolic process	gi|68486906|ref|XP_712675.1|/0/hypothetical protein CaO19.9901 [Candida albicans SC5314]
orf19.3048	3.63899	0.900528	-	-	-	-	gi|68468975|ref|XP_721546.1|/0/hypothetical protein CaO19.3048 [Candida albicans SC5314]
orf19.787	3.63456	0.947031	-	-	-	-	gi|68469563|ref|XP_721033.1|/3.5839e-12/hypothetical protein CaO19.8406 [Candida albicans SC5314]
orf19.4170	3.63024	0.934786	-	-	-	-	gi|68486691|ref|XP_712774.1|/1.41762e-134/hypothetical protein CaO19.11646 [Candida albicans SC5314]
orf19.3356	3.62838	0.885202	K02365|1|0.0|2984|cal:CaO19.3356|separase [EC:3.4.22.49]	GO:0043231//intracellular membrane-bounded organelle	GO:0016787//hydrolase activity	GO:0019538//protein metabolic process	gi|68475121|ref|XP_718446.1|/0/hypothetical protein CaO19.10864 [Candida albicans SC5314]
orf19.4080	3.62546	0.945518	-	-	-	-	gi|68483596|ref|XP_714251.1|/1.46829e-151/hypothetical protein CaO19.4080 [Candida albicans SC5314]
orf19.3522	3.6252	0.924853	-	-	GO:0003676//nucleic acid binding	-	gi|68482120|ref|XP_714944.1|/3.53313e-52/possible reverse transcriptase fragment [Candida albicans SC5314]
orf19.1668	3.61331	0.869545	-	GO:0005622//intracellular	-	-	gi|68468371|ref|XP_721745.1|/0/hypothetical protein CaO19.1668 [Candida albicans SC5314]
orf19.4312	3.61073	0.982307	K11360|1|0.0|1246|cal:CaO19.4312|transcriptional activator SPT8	-	-	-	gi|68470747|ref|XP_720619.1|/0/hypothetical protein CaO19.4312 [Candida albicans SC5314]
orf19.6420	3.61059	0.939244	-	-	-	-	gi|68479453|ref|XP_716258.1|/1.99746e-101/hypothetical protein CaO19.6420 [Candida albicans SC5314]
orf19.5503	3.6093	0.918717	-	-	-	-	gi|68491327|ref|XP_710531.1|/1.01067e-35/hypothetical protein CaO19.5503 [Candida albicans SC5314]
orf19.712	3.60787	0.901299	K10398|1|0.0|1640|cal:CaO19.712|kinesin family member 11	GO:0015630//microtubule cytoskeleton	GO:0003774//motor activity;GO:0032559	GO:0007017//microtubule-based process	gi|68486000|ref|XP_713072.1|/0/potential microtubule motor complex protein Kip1 [Candida albicans SC5314]
orf19.7517	3.60336	0.921413	K01183|1|0.0|736|cal:CaO19.7517|chitinase [EC:3.2.1.14]	-	GO:0004553//hydrolase activity, hydrolyzing O-glycosyl compounds	GO:0008152//metabolic process	gi|68474602|ref|XP_718674.1|/0/hypothetical protein CaO19.7517 [Candida albicans SC5314]
orf19.345	3.59715	0.952727	K00135|1|0.0|948|cal:CaO19.345|succinate-semialdehyde dehydrogenase (NADP+) [EC:1.2.1.16]	-	GO:0004030//aldehyde dehydrogenase [NAD(P)+] activity	GO:0008152//metabolic process	gi|238880744|gb|EEQ44382.1|/0/succinate-semialdehyde dehydrogenase [Candida albicans WO-1]
orf19.4573	3.59715	0.830307	K01684|1|8e-08|58.9|ani:AN4828.2|galactonate dehydratase [EC:4.2.1.6];K09241|2|1e-06|54.7|lth:KLTH0H02684g|transcriptional regulatory protein GAL4	GO:0043231//intracellular membrane-bounded organelle	GO:0046914//transition metal ion binding;GO:0003676//nucleic acid binding;GO:0001071//nucleic acid binding transcription factor activity	GO:0006351//transcription, DNA-dependent	gi|68466031|ref|XP_722790.1|/0/hypothetical protein CaO19.12042 [Candida albicans SC5314]
orf19.6499	3.59664	0.909499	K10908|1|0.0|2415|cal:CaO19_6499|DNA-directed RNA polymerase, mitochondrial [EC:2.7.7.6]	-	GO:0003676//nucleic acid binding;GO:0034062//RNA polymerase activity	GO:0010467//gene expression	gi|68469100|ref|XP_721337.1|/0/hypothetical protein CaO19.6499 [Candida albicans SC5314]
orf19.6366	3.58404	0.937841	-	-	GO:0003676//nucleic acid binding	-	gi|68479351|ref|XP_716207.1|/5.66155e-140/hypothetical protein CaO19.6366 [Candida albicans SC5314]
orf19.2637	3.57607	0.977492	-	-	-	-	gi|68488161|ref|XP_712041.1|/0/hypothetical protein CaO19.10160 [Candida albicans SC5314]
orf19.1116	3.56519	0.916295	-	-	-	-	gi|68489974|ref|XP_711189.1|/5.66082e-107/hypothetical protein CaO19.8713 [Candida albicans SC5314]
orf19.5220	3.55105	0.868417	K01175|1|2e-150|530|cal:CaO19.12687|[EC:3.1.-.-]	GO:0044464//cell part	GO:0005488//binding;GO:0004518//nuclease activity	-	gi|74679939|sp|Q5A3Q0.1|REXO4_CANAL/2.188e-149/RecName: Full=RNA exonuclease 4
orf19.2253	3.54979	0.944967	-	-	-	-	gi|68482422|ref|XP_714843.1|/0/conserved fungal hypothetical protein [Candida albicans SC5314]
orf19.1113	3.54831	0.909884	-	-	-	-	gi|68489968|ref|XP_711186.1|/1.30588e-99/hypothetical protein CaO19.8710 [Candida albicans SC5314]
orf19.6662	3.53987	0.953635	-	-	-	-	gi|68489484|ref|XP_711415.1|/1.26472e-100/hypothetical protein CaO19.6662 [Candida albicans SC5314]
orf19.841	3.52732	0.986159	K09313|1|0.0|1284|cal:CaO19.841|homeobox protein cut-like	GO:0031228//intrinsic to Golgi membrane	-	GO:0048193//Golgi vesicle transport	gi|68469910|ref|XP_720965.1|/0/hypothetical protein CaO19.841 [Candida albicans SC5314]
orf19.6392	3.52191	0.966898	-	-	-	-	gi|68479401|ref|XP_716232.1|/1.23317e-179/hypothetical protein CaO19.6392 [Candida albicans SC5314]
orf19.1028	3.51838	0.908453	K15077|1|2e-173|607|cal:CaO19.1028|elongin-A	-	-	-	gi|68484824|ref|XP_713633.1|/2.2861e-172/hypothetical protein CaO19.1028 [Candida albicans SC5314]
orf19.4765	3.51687	0.942491	-	-	-	-	gi|68464747|ref|XP_723451.1|/2.96371e-56/potential cell wall mannoprotein [Candida albicans SC5314]
orf19.2681	3.51317	0.922844	K01166|1|0.0|676|cal:CaO19.2681|ribonuclease T2 [EC:3.1.27.1]	-	GO:0003676//nucleic acid binding;GO:0016892	-	gi|68470854|ref|XP_720434.1|/0/probable T2 family ribonuclease [Candida albicans SC5314]
orf19.3736	3.50906	0.974767	-	-	GO:0016741	GO:0006730//one-carbon metabolic process;GO:0034641//cellular nitrogen compound metabolic process	gi|68485326|ref|XP_713424.1|/0/hypothetical protein CaO19.3736 [Candida albicans SC5314]
orf19.2469	3.505	0.958698	K10849|1|6e-172|602|cal:CaO19.2469|DNA excision repair protein ERCC-1	GO:0043231//intracellular membrane-bounded organelle	GO:0003677//DNA binding;GO:0004518//nuclease activity	GO:0006259//DNA metabolic process	gi|68474733|ref|XP_718574.1|/5.93741e-171/hypothetical protein CaO19.10006 [Candida albicans SC5314]
orf19.2317	3.50249	0.836718	-	-	-	-	gi|68484176|ref|XP_713980.1|/5.87079e-55/hypothetical protein CaO19.9853 [Candida albicans SC5314]
orf19.3501	3.48417	0.946921	-	-	GO:0046872//metal ion binding	-	gi|189093912|ref|XP_443846.1|/0/hypothetical protein CaO19.3501 [Candida albicans SC5314]
orf19.6672	3.48025	0.993534	K03686|1|0.0|897|cal:CaO19.6672|molecular chaperone DnaJ	GO:0044424//intracellular part	GO:0043169//cation binding;GO:0005515//protein binding;GO:0032559	GO:0006950//response to stress;GO:0044267//cellular protein metabolic process	gi|68489502|ref|XP_711424.1|/0/potential DnaJ-like mitochondrial co-chaperone [Candida albicans SC5314]
orf19.4895	3.48014	0.956937	-	-	-	-	gi|68464999|ref|XP_723577.1|/1.27358e-135/hypothetical protein CaO19.4895 [Candida albicans SC5314]
orf19.4266	3.47039	0.94593	K12773|1|2e-15|69.3|sce:YGR059W|sporulation-regulated protein 3	GO:0032156	GO:0032561//guanyl ribonucleotide binding	GO:0009987//cellular process	gi|241955631|ref|XP_002420536.1|/1.40902e-104/meiotic septin, putative; sporulation-regulated protein, putative [Candida dubliniensis CD36]
orf19.4342	3.46993	0.889137	-	-	-	-	gi|68470803|ref|XP_720647.1|/5.8385e-140/potential fungal zinc cluster transcription factor [Candida albicans SC5314]
orf19.2830	3.46495	0.957762	K14793|1|0.0|1024|cal:CaO19.2830|ribosomal RNA-processing protein 9	-	-	-	gi|68480424|ref|XP_715811.1|/0/hypothetical protein CaO19.10348 [Candida albicans SC5314]
orf19.2280	3.46115	0.946205	K09240|1|1e-13|78.6|pgu:PGUG_01292|transcriptional regulatory protein CAT8	GO:0043231//intracellular membrane-bounded organelle	GO:0046914//transition metal ion binding;GO:0003676//nucleic acid binding;GO:0001071//nucleic acid binding transcription factor activity	GO:0006351//transcription, DNA-dependent	gi|68482474|ref|XP_714869.1|/0/potential fungal zinc cluster transcription factor [Candida albicans SC5314]
orf19.3407	3.45988	0.938804	K10627|1|0.0|696|cal:CaO19.10910|E3 ubiquitin-protein ligase RAD18 [EC:6.3.2.19]	GO:0043231//intracellular membrane-bounded organelle	GO:0046914//transition metal ion binding;GO:0003677//DNA binding;GO:0003824//catalytic activity	GO:0006259//DNA metabolic process	gi|74679966|sp|Q5A4N5.1|RAD18_CANAL/0/RecName: Full=Postreplication repair E3 ubiquitin-protein ligase RAD18
orf19.2000	3.45948	0.896043	K11273|1|0.0|1538|cal:CaO19.2000|chromosome transmission fidelity protein 1 [EC:3.6.4.13]	GO:0043231//intracellular membrane-bounded organelle	GO:0003676//nucleic acid binding;GO:0003678//DNA helicase activity;GO:0042623//ATPase activity, coupled;GO:0032559	GO:0034641//cellular nitrogen compound metabolic process	gi|74586763|sp|Q5AD67.1|CHL1_CANAL/0/RecName: Full=ATP-dependent RNA helicase CHL1; AltName: Full=Chromosome loss protein 1
orf19.5050	3.45779	0.911975	K03495|1|0.0|1383|cal:CaO19.12517|tRNA uridine 5-carboxymethylaminomethyl modification enzyme	GO:0044424//intracellular part	GO:0050662//coenzyme binding	GO:0002097	gi|68476591|ref|XP_717588.1|/0/potential mitochondrial tRNA modification protein [Candida albicans SC5314]
orf19.2740	3.44964	0.939051	K15079|1|1e-82|307|ctp:CTRG_00249|structure-specific endonuclease subunit SLX4	-	-	-	gi|68470966|ref|XP_720490.1|/0/possible DNA replication structure-specific endonuclease subunit [Candida albicans SC5314]
orf19.576	3.44436	0.886908	K11270|1|4e-89|325|cal:CaO19.8207|chromosome transmission fidelity protein 8	-	-	-	gi|68483691|ref|XP_714204.1|/3.08168e-88/hypothetical protein CaO19.576 [Candida albicans SC5314]
orf19.341	3.43746	0.949425	K00492|1|2e-103|376|afv:AFLA_131810|[EC:1.14.13.-];K12604|2|1e-79|296|aor:AOR_1_978154|CCR4-NOT transcription complex subunit 1;K08157|3|8e-76|284|pan:PODANSg6573|MFS transporter, DHA1 family, multidrug resistance protein	-	-	GO:0006810//transport	gi|68471725|ref|XP_720169.1|/0/potential drug or polyamine transporter [Candida albicans SC5314]
orf19.5722	3.43516	0.982197	K09424|1|0.0|951|cal:CaO19.13145|Myb-like DNA-binding protein REB1	-	-	-	gi|68475707|ref|XP_718060.1|/0/hypothetical protein CaO19.5722 [Candida albicans SC5314]
orf19.823	3.43481	0.967613	-	-	-	-	gi|238882183|gb|EEQ45821.1|/8.45215e-115/conserved hypothetical protein [Candida albicans WO-1]
orf19.4583	3.43273	0.871719	K15109|1|0.0|642|cal:CaO19.12052|solute carrier family 25 (mitochondrial carnitine/acylcarnitine transporter), member 20/29	GO:0031224//intrinsic to membrane	-	GO:0051234//establishment of localization	gi|68466051|ref|XP_722800.1|/0/potential mitochondrial inner membrane transporter Ymc3 [Candida albicans SC5314]
orf19.3277	3.43111	0.926999	-	-	-	-	gi|68476053|ref|XP_717967.1|/1.69796e-59/hypothetical protein CaO19.3277 [Candida albicans SC5314]
orf19.5999	3.42478	0.902097	K10413|1|0.0|7885|cal:CaO19.13420|dynein heavy chain 1, cytosolic	GO:0005875//microtubule associated complex	GO:0003774//motor activity;GO:0005515//protein binding;GO:0032559	GO:0009207;GO:0007017//microtubule-based process;GO:0006351//transcription, DNA-dependent	gi|68465693|ref|XP_723208.1|/0/cytoplasmic dynein heavy chain [Candida albicans SC5314]
orf19.3009	3.42233	0.907848	-	-	-	-	gi|68468897|ref|XP_721507.1|/0/hypothetical protein CaO19.3009 [Candida albicans SC5314]
orf19.7102	3.42114	0.888063	K11137|1|9e-17|87.0|cal:CaO19_7102|telomere length regulation protein	-	GO:0005488//binding	-	gi|68471233|ref|XP_720393.1|/0/hypothetical protein CaO19.7102 [Candida albicans SC5314]
orf19.5934	3.41243	0.859419	K03165|1|0.0|1255|cal:CaO19.13355|DNA topoisomerase III [EC:5.99.1.2]	GO:0043232	GO:0003916//DNA topoisomerase activity	GO:0006261//DNA-dependent DNA replication	gi|68465569|ref|XP_723146.1|/0/likely DNA topoisomerase III [Candida albicans SC5314]
orf19.5604	3.40966	0.829646	K08158|1|0.0|739|pic:PICST_59685|MFS transporter, DHA1 family, multidrug resistance protein	GO:0031224//intrinsic to membrane	GO:0022857//transmembrane transporter activity	GO:0015893//drug transport	gi|114215708|gb|ABI54465.1|/0/multidrug efflux pump [Candida albicans]
orf19.2859	3.40848	0.97829	-	GO:0030529//ribonucleoprotein complex	GO:0005488//binding	-	gi|238879759|gb|EEQ43397.1|/3.60503e-57/conserved hypothetical protein [Candida albicans WO-1]
orf19.3711	3.40588	0.904353	K00492|1|0.0|1368|cal:CaO19.11196|[EC:1.14.13.-];K03380|3|0.0|1087|cdu:CD36_33600|phenol 2-monooxygenase [EC:1.14.13.7]	-	GO:0016709//oxidoreductase activity, acting on paired donors, with incorporation or reduction of molecular oxygen, NAD(P)H as one donor, and incorporation of one atom of oxygen	GO:0008152//metabolic process	gi|68490231|ref|XP_711064.1|/0/hypothetical protein CaO19.11196 [Candida albicans SC5314]
orf19.7609	3.40406	0.883303	-	-	-	-	gi|68473129|ref|XP_719370.1|/6.72164e-40/hypothetical protein CaO19.7609 [Candida albicans SC5314]
orf19.6046	3.39876	0.958588	K03348|1|0.0|2949|cal:CaO19.13467|anaphase-promoting complex subunit 1	-	GO:0003824//catalytic activity	-	gi|68473810|ref|XP_719008.1|/0/potential anaphase-promoting complex ubiquitin ligase subunit Apc1 [Candida albicans SC5314]
orf19.2325	3.39647	0.943206	K15205|1|0.0|1046|cal:CaO19.2325|transcription factor C subunit 6	-	-	-	gi|68484192|ref|XP_713988.1|/0/hypothetical protein CaO19.9861 [Candida albicans SC5314]
orf19.7472	3.39311	0.919845	K01186|1|3e-74|280|pic:PICST_61722|sialidase-1 [EC:3.2.1.18];K01183|4|9e-18|92.8|spo:SPAPB1E7.04c|chitinase [EC:3.2.1.14]	-	-	-	gi|68474514|ref|XP_718630.1|/0/hypothetical protein CaO19.7472 [Candida albicans SC5314]
orf19.7372	3.39117	0.945215	K09247|1|8e-27|122|ago:AGOS_AFR117C|heme activator protein 1	-	-	-	gi|187711069|gb|ACD14112.1|/0/multidrug resistance regulator 1 [Candida albicans]
orf19.4167	3.38793	0.951269	-	-	-	-	gi|68486992|ref|XP_712621.1|/2.48334e-77/hypothetical protein CaO19.4167 [Candida albicans SC5314]
orf19.6501	3.38512	0.942821	K01567|1|2e-06|52.0|mgr:MGG_03999|[EC:3.-.-.-]	-	GO:0004091//carboxylesterase activity	-	gi|68469104|ref|XP_721339.1|/6.91768e-167/hypothetical protein CaO19.6501 [Candida albicans SC5314]
orf19.801	3.38408	0.952947	K03132|1|6e-06|52.8|vpo:Kpol_1043p55|transcription initiation factor TFIID subunit 7	GO:0044427//chromosomal part;GO:0043231//intracellular membrane-bounded organelle	GO:0043565//sequence-specific DNA binding	GO:0006278//RNA-dependent DNA replication	gi|68469830|ref|XP_720925.1|/0/hypothetical protein CaO19.801 [Candida albicans SC5314]
orf19.5033	3.38364	0.898767	K08336|1|3e-73|272|cal:CaO19.5033|autophagy-related protein 12	GO:0044424//intracellular part	-	GO:0006810//transport;GO:0044248//cellular catabolic process;GO:0007033//vacuole organization	gi|68467375|ref|XP_722349.1|/2.47589e-72/potential preautophagosome nucleating protein Atg12 [Candida albicans SC5314]
orf19.4545	3.38056	0.947856	K06649|1|0.0|1681|cal:CaO19.4545|regulatory protein SWI4	-	GO:0003676//nucleic acid binding;GO:0001071//nucleic acid binding transcription factor activity	GO:0006351//transcription, DNA-dependent	gi|68486343|ref|XP_712970.1|/0/potential DNA binding component of SBF [Candida albicans SC5314]
orf19.2479	3.37739	0.803946	K09885|1|5e-104|377|ani:AN7168.2|aquaporin rerated protein, other eukaryote	GO:0031224//intrinsic to membrane	GO:0005275//amine transmembrane transporter activity	GO:0006865//amino acid transport	gi|68474918|ref|XP_718500.1|/0/potential GABA-specific transport protein [Candida albicans SC5314]
orf19.7414	3.3728	0.91547	K01178|1|5e-07|57.0|sce:YIR019C|glucoamylase [EC:3.2.1.3];K01186|2|2e-06|55.1|pic:PICST_3402|sialidase-1 [EC:3.2.1.18]	-	-	-	gi|29293655|gb|AAO72081.1|/0/agglutinin-like protein 6 [Candida albicans]
orf19.2600	3.37191	0.921798	-	GO:0005819//spindle	-	GO:0007010//cytoskeleton organization	gi|68475284|ref|XP_718360.1|/0/hypothetical protein CaO19.10131 [Candida albicans SC5314]
orf19.4805	3.36597	0.912443	K01196|1|4e-14|79.7|ani:AN0352.2|glycogen debranching enzyme [EC:2.4.1.25 3.2.1.33]	GO:0044464//cell part	-	-	gi|68464827|ref|XP_723491.1|/0/hypothetical protein CaO19.4805 [Candida albicans SC5314]
orf19.4592	3.36565	0.957432	K00720|1|0.0|1113|cal:CaO19.12061|ceramide glucosyltransferase [EC:2.4.1.80]	-	GO:0003824//catalytic activity	-	gi|68466069|ref|XP_722809.1|/0/ceramide glucosyltransferase [Candida albicans SC5314]
orf19.2460	3.36427	0.815998	-	-	-	-	gi|238878963|gb|EEQ42601.1|/1.45892e-127/conserved hypothetical protein [Candida albicans WO-1]
orf19.7197	3.36228	0.923862	K14834|1|0.0|1151|cal:CaO19_7197|nucleolar complex protein 3	-	-	-	gi|68481754|ref|XP_715245.1|/0/hypothetical protein CaO19.7197 [Candida albicans SC5314]
orf19.1366	3.36017	0.826674	K04125|1|8e-28|124|pic:PICST_51972|gibberellin 2-oxidase [EC:1.14.11.13];K06892|2|8e-12|70.9|pno:SNOG_10916|	-	GO:0003824//catalytic activity	GO:0008152//metabolic process	gi|68482820|ref|XP_714636.1|/0/hypothetical protein CaO19.8946 [Candida albicans SC5314]
orf19.2875	3.35949	0.948765	K09529|1|8e-123|438|cal:CaO19.10393|DnaJ homolog subfamily C member 9	-	GO:0005515//protein binding	GO:0044267//cellular protein metabolic process	gi|68480868|ref|XP_715587.1|/8.06845e-122/DnaJ-like protein [Candida albicans SC5314]
orf19.6148	3.35866	0.918524	K09291|1|8e-21|102|cgr:CAGL0G02497g|nucleoprotein TPR	-	GO:0032559	-	gi|68487538|ref|XP_712390.1|/0/hypothetical protein CaO19.13567 [Candida albicans SC5314]
orf19.416	3.35845	0.840983	-	-	-	-	gi|68480181|ref|XP_715901.1|/0/hypothetical protein CaO19.8046 [Candida albicans SC5314]
orf19.7073	3.35789	0.917809	K12386|1|8e-111|398|cdu:CD36_70180|cystinosin	-	-	-	gi|68471177|ref|XP_720365.1|/4.88134e-122/hypothetical protein CaO19.7073 [Candida albicans SC5314]
orf19.1580	3.35468	0.851604	-	-	-	-	gi|68466853|ref|XP_722622.1|/0/hypothetical YFW family protein 3 [Candida albicans SC5314]
orf19.306	3.34917	0.924055	K10405|1|8e-09|61.6|vpo:Kpol_1050p103|kinesin family member C1	-	-	-	gi|68471653|ref|XP_720133.1|/0/hypothetical protein CaO19.7938 [Candida albicans SC5314]
orf19.3429	3.34764	0.896043	-	-	-	-	gi|68478469|ref|XP_716736.1|/0/hypothetical protein CaO19.3429 [Candida albicans SC5314]
orf19.5862	3.34637	0.934676	K01480|1|0.0|855|cal:CaO19.13284|agmatinase [EC:3.5.3.11]	-	GO:0016813//hydrolase activity, acting on carbon-nitrogen (but not peptide) bonds, in linear amidines;GO:0043169//cation binding	-	gi|68465433|ref|XP_723078.1|/0/arginase family protein [Candida albicans SC5314]
orf19.776	3.34447	0.845275	K12780|1|0.0|1178|cal:CaO19.776|meiotic recombination protein REC8, fungi type	-	-	-	gi|68485040|ref|XP_713586.1|/0/potential nuclear cohesin complex subunit [Candida albicans SC5314]
orf19.5644	3.33986	0.924578	-	-	-	-	gi|68485389|ref|XP_713372.1|/2.68544e-164/hypothetical protein CaO19.13089 [Candida albicans SC5314]
orf19.2798	3.33957	0.926559	K01152|1|2e-101|369|pic:PICST_88383|type I restriction enzyme [EC:3.1.21.3];K01529|2|1e-78|293|afm:AFUA_7G05530|[EC:3.6.1.-];K14811|3|2e-09|63.9|zro:ZYRO0G08580g|ATP-dependent RNA helicase DBP3 [EC:3.6.4.13];K14808|4|4e-09|62.8|ncr:NCU07712|ATP-dependent RNA helicase DDX54/DBP10 [EC:3.6.4.13];K14779|5|2e-08|60.5|cgr:CAGL0K02387g|ATP-dependent RNA helicase DDX52/ROK1 [EC:3.6.4.13]	-	GO:0017111//nucleoside-triphosphatase activity;GO:0003676//nucleic acid binding;GO:0032559	-	gi|68488835|ref|XP_711764.1|/0/hypothetical protein CaO19.10316 [Candida albicans SC5314]
orf19.4629	3.33944	0.923972	-	-	-	-	gi|68466438|ref|XP_722701.1|/0/hypothetical protein CaO19.4629 [Candida albicans SC5314]
orf19.660	3.33629	0.879423	-	-	-	-	gi|68484445|ref|XP_713833.1|/0/hypothetical protein CaO19.8276 [Candida albicans SC5314]
orf19.4664	3.33434	0.944444	-	-	GO:0016407//acetyltransferase activity	-	gi|68466504|ref|XP_722734.1|/9.55501e-96/potential histone N-acetyl tranferase (GNAT family) [Candida albicans SC5314]
orf19.7163	3.33088	0.943702	-	-	-	-	gi|68481688|ref|XP_715212.1|/4.94185e-75/hypothetical protein CaO19.7163 [Candida albicans SC5314]
orf19.7401	3.3297	0.952177	K01509|1|0.0|1480|pic:PICST_30157|adenosinetriphosphatase [EC:3.6.1.3];K11367|3|1e-132|473|spo:SPAC1783.05|chromodomain-helicase-DNA-binding protein 1 [EC:3.6.4.12];K11786|4|4e-132|472|vpo:Kpol_1039p15|ATP-dependent helicase STH1/SNF2 [EC:3.6.4.-]	GO:0043231//intracellular membrane-bounded organelle;GO:0043234//protein complex	GO:0017111//nucleoside-triphosphatase activity;GO:0003676//nucleic acid binding;GO:0003682//chromatin binding;GO:0032559	GO:0009207;GO:0006338//chromatin remodeling	gi|238881028|gb|EEQ44666.1|/0/chromatin remodelling complex ATPase chain ISW1 [Candida albicans WO-1]
orf19.5510	3.32961	0.944059	-	-	-	-	gi|238883122|gb|EEQ46760.1|/0/conserved hypothetical protein [Candida albicans WO-1]
orf19.5011	3.32916	0.929998	-	-	-	-	gi|68467335|ref|XP_722329.1|/0/hypothetical protein CaO19.12478 [Candida albicans SC5314]
orf19.4590	3.32617	0.896043	K09175|1|1e-07|58.9|sce:YLR176C|regulatory factor X, other	-	-	-	gi|68466065|ref|XP_722807.1|/0/hypothetical protein CaO19.12059 [Candida albicans SC5314]
orf19.1631	3.3255	0.967833	K00559|1|0.0|777|cal:CaO19.1631|sterol 24-C-methyltransferase [EC:2.1.1.41]	-	GO:0008169//C-methyltransferase activity	GO:0006694//steroid biosynthetic process;GO:0006730//one-carbon metabolic process	gi|6015114|sp|O74198.1|ERG6_CANAL/0/RecName: Full=Sterol 24-C-methyltransferase; AltName: Full=Delta(24)-sterol C-methyltransferase
orf19.3798	3.32398	0.972951	K03439|1|9e-178|621|cal:CaO19.3798|tRNA (guanine-N7-)-methyltransferase [EC:2.1.1.33]	-	GO:0003723//RNA binding;GO:0016423//tRNA (guanine) methyltransferase activity	GO:0006730//one-carbon metabolic process;GO:0008033//tRNA processing	gi|229891733|sp|Q5A692.2|TRMB_CANAL/8.8746e-177/RecName: Full=tRNA (guanine-N(7)-)-methyltransferase; AltName: Full=Transfer RNA methyltransferase 8; AltName: Full=tRNA (guanine(46)-N(7))-methyltransferase; AltName: Full=tRNA(m7G46)-methyltransferase
orf19.4244	3.32097	0.858263	-	-	-	-	gi|68470615|ref|XP_720553.1|/2.89842e-72/hypothetical protein CaO19.4244 [Candida albicans SC5314]
orf19.3010	3.31892	0.918441	K03801|1|8e-148|521|cal:CaO19.10528|lipoyl(octanoyl) transferase [EC:2.3.1.181]	GO:0044424//intracellular part	-	GO:0006633//fatty acid biosynthetic process;GO:0043412//macromolecule modification	gi|68468899|ref|XP_721508.1|/7.8793e-147/hypothetical protein CaO19.3010 [Candida albicans SC5314]
orf19.4995	3.31859	0.820758	-	-	-	-	gi|68467305|ref|XP_722314.1|/0/hypothetical protein CaO19.12462 [Candida albicans SC5314]
orf19.3093	3.31347	0.95823	K08735|1|0.0|1661|cal:CaO19.10605|DNA mismatch repair protein MSH2	-	GO:0032559;GO:0003690//double-stranded DNA binding	GO:0006281//DNA repair	gi|68481114|ref|XP_715472.1|/0/hypothetical protein CaO19.10605 [Candida albicans SC5314]
orf19.5302	3.31308	0.915552	-	-	-	-	gi|68477585|ref|XP_717105.1|/1.19051e-153/hypothetical LDG family protein 5 [Candida albicans SC5314]
orf19.3012	3.31123	0.952947	-	GO:0043231//intracellular membrane-bounded organelle	GO:0046914//transition metal ion binding;GO:0003676//nucleic acid binding;GO:0001071//nucleic acid binding transcription factor activity	GO:0006351//transcription, DNA-dependent	gi|68468903|ref|XP_721510.1|/0/potential fungal zinc cluster transcription factor [Candida albicans SC5314]
orf19.1251	3.30906	0.958093	K06676|1|0.0|1213|cal:CaO19.8835|condensin complex subunit 2	-	-	GO:0051276//chromosome organization;GO:0000087//M phase of mitotic cell cycle	gi|68478794|ref|XP_716559.1|/0/potential nuclear condensin complex subunit H [Candida albicans SC5314]
orf19.308	3.29982	0.958698	-	-	-	-	gi|68471657|ref|XP_720135.1|/0/hypothetical protein CaO19.7940 [Candida albicans SC5314]
orf19.2434	3.29938	0.9754	K14015|1|0.0|1128|cal:CaO19.2434|nuclear protein localization protein 4 homolog	GO:0012505//endomembrane system;GO:0031090//organelle membrane;GO:0044444//cytoplasmic part;GO:0005634//nucleus;GO:0044446//intracellular organelle part	-	GO:0006810//transport;GO:0033036	gi|74590800|sp|Q5AA50.1|NPL4_CANAL/0/RecName: Full=Nuclear protein localization protein 4
orf19.34	3.29527	0.975345	K08176|1|1e-33|144|scm:SCHCODRAFT_68152|MFS transporter, PHS family, inorganic phosphate transporter	GO:0031224//intrinsic to membrane	-	GO:0006810//transport	gi|68488665|ref|XP_711841.1|/0/potential glycerophosphoinositol permease [Candida albicans SC5314]
orf19.2220	3.28264	0.86495	-	-	-	-	gi|238883706|gb|EEQ47344.1|/1.43673e-29/conserved hypothetical protein [Candida albicans WO-1]
orf19.5166	3.28144	0.951791	K02309|1|0.0|910|cal:CaO19_5166|regulatory subunit for Cdc7p protein kinase	-	GO:0016772//transferase activity, transferring phosphorus-containing groups;GO:0046914//transition metal ion binding	GO:0006796//phosphate-containing compound metabolic process	gi|238883424|gb|EEQ47062.1|/0/conserved hypothetical protein [Candida albicans WO-1]
orf19.2669	3.27776	0.970723	K00986|1|3e-13|77.8|pic:PICST_28003|RNA-directed DNA polymerase [EC:2.7.7.49];K00140|4|3e-11|71.2|uma:UM00214.1|malonate-semialdehyde dehydrogenase (acetylating) / methylmalonate-semialdehyde dehydrogenase [EC:1.2.1.18 1.2.1.27]	-	-	-	gi|68470830|ref|XP_720422.1|/0/retrotransposon TCA4 polyprotein [Candida albicans SC5314]
orf19.1265	3.27458	0.880551	-	-	-	-	gi|68478927|ref|XP_716518.1|/0/hypothetical protein CaO19.8850 [Candida albicans SC5314]
orf19.3610	3.26812	0.905784	-	-	-	-	gi|68483137|ref|XP_714503.1|/0/hypothetical protein CaO19.11093 [Candida albicans SC5314]
orf19.4068	3.26694	0.949893	-	-	-	-	gi|68483578|ref|XP_714242.1|/0/hypothetical protein CaO19.4068 [Candida albicans SC5314]
orf19.4934	3.26597	0.925403	-	-	-	-	gi|68467424|ref|XP_722145.1|/3.94407e-159/opaque phase-specific protein Ops4 [Candida albicans SC5314]
orf19.1268	3.26146	0.892989	-	-	-	-	gi|68478828|ref|XP_716576.1|/1.69549e-62/hypothetical protein CaO19.1268 [Candida albicans SC5314]
orf19.5065	3.25525	0.935089	-	-	-	-	gi|68476621|ref|XP_717603.1|/0/hypothetical protein CaO19.5065 [Candida albicans SC5314]
orf19.1828	3.25365	0.901051	K00868|1|2e-180|630|cal:CaO19.1828|pyridoxine kinase [EC:2.7.1.35]	-	GO:0016301//kinase activity	GO:0008614//pyridoxine metabolic process	gi|68490602|ref|XP_710888.1|/1.6276e-179/hypothetical protein CaO19.9387 [Candida albicans SC5314]
orf19.4612	3.25275	0.83116	K01066|1|9e-48|189|afm:AFUA_6G12740|esterase / lipase [EC:3.1.1.-];K01061|4|6e-12|70.1|mgr:MGG_02570|carboxymethylenebutenolidase [EC:3.1.1.45]	-	GO:0003824//catalytic activity	-	gi|68466111|ref|XP_722830.1|/2.0588e-136/hypothetical protein CaO19.12082 [Candida albicans SC5314]
orf19.2343	3.25204	0.942298	K12183|1|0.0|941|cal:CaO19.2343|ESCRT-I complex subunit TSG101	-	-	GO:0043412//macromolecule modification;GO:0006810//transport	gi|68484228|ref|XP_714006.1|/0/hypothetical protein CaO19.9879 [Candida albicans SC5314]
orf19.7604	3.25196	0.943261	K09184|1|1e-11|72.0|uma:UM04252.1|GATA-binding protein, other eukaryote	-	-	-	gi|238880391|gb|EEQ44029.1|/0/conserved hypothetical protein [Candida albicans WO-1]
orf19.3910	3.25037	0.897254	K01166|1|0.0|769|cal:CaO19.3910|ribonuclease T2 [EC:3.1.27.1]	-	GO:0016892;GO:0003676//nucleic acid binding	-	gi|68467641|ref|XP_721979.1|/0/probable T2 family ribonuclease [Candida albicans SC5314]
orf19.2829	3.24933	0.960734	-	-	-	-	gi|68480422|ref|XP_715810.1|/2.00266e-47/hypothetical protein CaO19.10347 [Candida albicans SC5314]
orf19.2602	3.2458	0.910021	-	-	-	GO:0006810//transport	gi|68475288|ref|XP_718362.1|/0/oligopeptide transporter Opt1p [Candida albicans SC5314]
orf19.952	3.24513	0.941638	-	-	GO:0003676//nucleic acid binding	-	gi|68478219|ref|XP_716851.1|/0/hypothetical protein CaO19.8567 [Candida albicans SC5314]
orf19.5549	3.24294	0.817209	-	-	-	-	gi|68473575|ref|XP_719112.1|/2.80703e-105/hypothetical protein CaO19.5549 [Candida albicans SC5314]
orf19.690	3.24284	0.840763	K13333|1|0.0|1199|cal:CaO19.690|lysophospholipase [EC:3.1.1.5]	-	GO:0004091//carboxylesterase activity;GO:0016298//lipase activity	GO:0006644//phospholipid metabolic process	gi|68484509|ref|XP_713865.1|/0/phospholipase B2 [Candida albicans SC5314]
orf19.465	3.23908	0.818667	K01186|1|1e-80|300|pic:PICST_61722|sialidase-1 [EC:3.2.1.18]	-	-	-	gi|68477074|ref|XP_717330.1|/0/potential Hyr1-like cell wall protein [Candida albicans SC5314]
orf19.6026	3.23427	0.936162	K09829|1|9e-127|451|cal:CaO19.13447|C-8 sterol isomerase [EC:5.-.-.-]	GO:0043231//intracellular membrane-bounded organelle	GO:0016863//intramolecular oxidoreductase activity, transposing C=C bonds	GO:0008204//ergosterol metabolic process	gi|238879419|gb|EEQ43057.1|/7.74125e-126/C-8 sterol isomerase [Candida albicans WO-1]
orf19.515	3.23403	0.932612	-	-	GO:0046914//transition metal ion binding	-	gi|68476981|ref|XP_717468.1|/3.4087e-71/hypothetical protein CaO19.8146 [Candida albicans SC5314]
orf19.2426	3.2334	0.948269	K07023|1|2e-147|520|cal:CaO19.2426|putative hydrolases of HD superfamily	-	-	-	gi|68485659|ref|XP_713312.1|/1.9306e-146/hypothetical protein CaO19.9964 [Candida albicans SC5314]
orf19.4305	3.23334	0.892796	K03254|1|5e-07|53.9|cdu:CD36_11950|translation initiation factor 3 subunit A	-	-	-	gi|68470472|ref|XP_720740.1|/9.52652e-118/hypothetical protein CaO19.11781 [Candida albicans SC5314]
orf19.3925	3.23192	0.914644	-	-	-	-	gi|68467673|ref|XP_721995.1|/5.53854e-80/hypothetical protein CaO19.11407 [Candida albicans SC5314]
orf19.3715	3.22989	0.941418	K10753|1|2e-103|374|cal:CaO19.3715|histone chaperone ASF1	GO:0043231//intracellular membrane-bounded organelle	-	GO:0006325//chromatin organization	gi|238880192|gb|EEQ43830.1|/1.54746e-102/hypothetical protein CAWG_02081 [Candida albicans WO-1]
orf19.5138	3.22796	0.951434	-	-	-	-	gi|68477915|ref|XP_716961.1|/0/hypothetical LPF family protein 32 [Candida albicans SC5314]
orf19.3655	3.22732	0.829784	-	-	-	-	gi|68489704|ref|XP_711327.1|/0/hypothetical protein CaO19.3655 [Candida albicans SC5314]
orf19.3865	3.22508	0.910847	K09175|1|0.0|1282|cal:CaO19.3865|regulatory factor X, other	-	-	-	gi|68485085|ref|XP_713532.1|/0/hypothetical protein CaO19.11346 [Candida albicans SC5314]
orf19.6291	3.22057	0.929558	K14439|1|0.0|1576|cal:CaO19.13670|SWI/SNF-related matrix-associated actin-dependent regulator of chromatin subfamily A containing DEAD/H box 1 [EC:3.6.4.12]	-	GO:0003676//nucleic acid binding;GO:0017111//nucleoside-triphosphatase activity;GO:0032559	-	gi|68490054|ref|XP_711148.1|/0/hypothetical protein CaO19.6291 [Candida albicans SC5314]
orf19.4965	3.21632	0.863464	-	-	-	-	gi|68467251|ref|XP_722287.1|/0/hypothetical protein CaO19.12430 [Candida albicans SC5314]
orf19.2642	3.21418	0.88311	K02183|1|2e-06|50.8|cgr:CAGL0D01452g|calmodulin	-	GO:0046872//metal ion binding	-	gi|68488171|ref|XP_712046.1|/3.27277e-89/hypothetical protein CaO19.10165 [Candida albicans SC5314]
orf19.6782	3.21334	0.927302	K13682|1|0.0|1281|cal:CaO19.14074|beta-1,2-mannosyltransferase [EC:2.4.1.-]	-	-	-	gi|238881101|gb|EEQ44739.1|/0/conserved hypothetical protein [Candida albicans WO-1]
orf19.1192	3.21057	0.955864	K10742|1|0.0|2680|cal:CaO19.1192|DNA replication ATP-dependent helicase Dna2 [EC:3.6.4.12]	-	GO:0003676//nucleic acid binding;GO:0003678//DNA helicase activity;GO:0032559	GO:0006259//DNA metabolic process	gi|68487366|ref|XP_712454.1|/0/hypothetical protein CaO19.8783 [Candida albicans SC5314]
orf19.4097	3.20896	0.952617	-	-	-	-	gi|68483630|ref|XP_714268.1|/0/hypothetical protein CaO19.4097 [Candida albicans SC5314]
orf19.3172	3.20867	0.940289	-	-	-	-	gi|68482919|ref|XP_714590.1|/3.80597e-75/hypothetical protein CaO19.3172 [Candida albicans SC5314]
orf19.5919	3.20681	0.888091	-	-	-	-	gi|68465541|ref|XP_723132.1|/0/hypothetical protein CaO19.5919 [Candida albicans SC5314]
orf19.3427	3.20364	0.850008	-	-	-	-	gi|68478465|ref|XP_716734.1|/3.89448e-43/hypothetical protein CaO19.3427 [Candida albicans SC5314]
orf19.1062	3.20252	0.925761	K03846|1|1e-99|362|ure:UREG_07209|alpha-1,2-mannosyltransferase [EC:2.4.1.259 2.4.1.261]	-	-	-	gi|68484799|ref|XP_713711.1|/0/hypothetical HRQ family protein 1 [Candida albicans SC5314]
orf19.356	3.20143	0.872572	K00799|1|4e-146|505|cdu:CD36_83590|glutathione S-transferase [EC:2.5.1.18]	-	GO:0016765//transferase activity, transferring alkyl or aryl (other than methyl) groups	-	gi|241953121|ref|XP_002419282.1|/3.48862e-145/glutathione S-transferase, putative [Candida dubliniensis CD36]
orf19.506	3.20107	0.991167	K09503|1|0.0|610|cal:CaO19.8136|DnaJ homolog subfamily A member 2	GO:0044424//intracellular part	GO:0043169//cation binding;GO:0005515//protein binding;GO:0032559	GO:0006950//response to stress;GO:0044267//cellular protein metabolic process	gi|68476961|ref|XP_717458.1|/0/probable DnaJ-like heat-shock protein [Candida albicans SC5314]
orf19.5213	3.20052	0.971466	K14400|1|1e-19|97.8|clu:CLUG_05488|pre-mRNA cleavage complex 2 protein Pcf11	-	-	-	gi|68490529|ref|XP_710921.1|/0/hypothetical protein CaO19.5213 [Candida albicans SC5314]
orf19.5242	3.19927	0.860079	K02213|1|0.0|694|cal:CaO19.12707|cell division control protein 6	-	GO:0032559;GO:0016462//pyrophosphatase activity	-	gi|4688625|emb|CAB41412.1|/0/CDC6 protein [Candida albicans]
orf19.7534	3.19761	0.967916	K00288|1|0.0|1947|cal:CaO19.7534|methylenetetrahydrofolate dehydrogenase (NADP+) / methenyltetrahydrofolate cyclohydrolase / formyltetrahydrofolate synthetase [EC:1.5.1.5 3.5.4.9 6.3.4.3]	-	GO:0016879//ligase activity, forming carbon-nitrogen bonds;GO:0004486//methylenetetrahydrofolate dehydrogenase [NAD(P)+] activity;GO:0019238//cyclohydrolase activity;GO:0032559	GO:0006760//folic acid-containing compound metabolic process	gi|68474634|ref|XP_718690.1|/0/hypothetical protein CaO19.7534 [Candida albicans SC5314]
orf19.7601	3.19666	0.960679	K15508|1|6e-150|528|cal:CaO19.7601|21S rRNA (uridine2791-2'-O)-methyltransferase [EC:2.1.1.168]	GO:0044424//intracellular part	GO:0005488//binding;GO:0008171//O-methyltransferase activity	GO:0006730//one-carbon metabolic process;GO:0000154//rRNA modification	gi|68473115|ref|XP_719363.1|/5.80906e-149/potential mitochondrial rRNA methyltransferase [Candida albicans SC5314]
orf19.1980	3.19369	0.897446	K08176|1|1e-18|94.0|lbc:LACBIDRAFT_297291|MFS transporter, PHS family, inorganic phosphate transporter	GO:0031224//intrinsic to membrane	-	GO:0006810//transport	gi|68480724|ref|XP_715742.1|/0/potential glycerophosphoinositol permease [Candida albicans SC5314]
orf19.4570	3.1936	0.948269	-	-	-	-	gi|68466025|ref|XP_722787.1|/7.12729e-82/hypothetical protein CaO19.12039 [Candida albicans SC5314]
orf19.5474	3.19349	0.949425	-	-	-	-	gi|68476391|ref|XP_717845.1|/0/hypothetical protein CaO19.5474 [Candida albicans SC5314]
orf19.2882	3.19006	0.898327	K03458|1|0.0|1149|cdu:CD36_46010|nucleobase:cation symporter-2, NCS2 family	GO:0044464//cell part	-	GO:0006810//transport	gi|68480882|ref|XP_715594.1|/0/potential purine permease [Candida albicans SC5314]
orf19.643	3.18378	0.870425	-	-	-	-	gi|68488310|ref|XP_711989.1|/0/hypothetical protein CaO19.643 [Candida albicans SC5314]
orf19.3432	3.18278	0.891255	-	-	-	GO:0006810//transport	gi|68478475|ref|XP_716739.1|/0/potential transmembrane protein [Candida albicans SC5314]
orf19.4105	3.18038	0.905426	K10998|1|5e-149|526|cal:CaO19.11586|replication fork protection complex subunit Csm3/Swi3	-	-	GO:0033554//cellular response to stress;GO:0006260//DNA replication	gi|74585240|sp|Q59X26.1|CSM3_CANAL/4.84383e-148/RecName: Full=Chromosome segregation in meiosis protein 3
orf19.4608	3.17994	0.924468	K01568|1|0.0|763|pic:PICST_64926|pyruvate decarboxylase [EC:4.1.1.1]	-	GO:0046872//metal ion binding;GO:0016831//carboxy-lyase activity;GO:0019842//vitamin binding	-	gi|238881655|gb|EEQ45293.1|/0/pyruvate decarboxylase isozyme 1 [Candida albicans WO-1]
orf19.7194	3.17471	0.935309	-	-	GO:0015002//heme-copper terminal oxidase activity	-	gi|68481748|ref|XP_715242.1|/4.00729e-107/hypothetical protein CaO19.7194 [Candida albicans SC5314]
orf19.7358	3.17414	0.915332	-	GO:0016020//membrane	-	-	gi|68478661|ref|XP_716599.1|/0/hypothetical protein CaO19.7358 [Candida albicans SC5314]
orf19.4061	3.17041	0.923064	K01930|1|7e-13|73.6|pan:PODANSg8090|folylpolyglutamate synthase [EC:6.3.2.17]	-	-	-	gi|68490903|ref|XP_710739.1|/2.90844e-137/hypothetical protein CaO19.11543 [Candida albicans SC5314]
orf19.6224	3.17025	0.894062	-	-	-	-	gi|68474208|ref|XP_718813.1|/0/potential phospholipid-translocating ATPase [Candida albicans SC5314]
orf19.1988	3.16289	0.931319	K06628|1|0.0|1120|cal:CaO19.1988|cell division control protein 45	-	GO:0008135//translation factor activity, nucleic acid binding	GO:0006412//translation;GO:0006259//DNA metabolic process	gi|68492229|ref|XP_710112.1|/0/hypothetical protein CaO19.1988 [Candida albicans SC5314]
orf19.5918	3.15929	0.966898	-	-	-	-	gi|68465539|ref|XP_723131.1|/1.00031e-30/hypothetical protein CaO19.5918 [Candida albicans SC5314]
orf19.7456	3.15791	0.856667	-	-	-	-	gi|68479899|ref|XP_716117.1|/0/hypothetical protein CaO19.7456 [Candida albicans SC5314]
orf19.5980	3.15634	0.975978	-	-	-	-	gi|68465659|ref|XP_723191.1|/0/hypothetical protein CaO19.5980 [Candida albicans SC5314]
orf19.3976	3.1543	0.894915	K10424|1|2e-165|581|cal:CaO19.11459|dynactin 2	-	-	-	gi|68467775|ref|XP_722046.1|/1.63956e-164/hypothetical protein CaO19.11459 [Candida albicans SC5314]
orf19.2818	3.14809	0.892576	K12815|1|0.0|1902|cal:CaO19.10336|pre-mRNA-splicing factor ATP-dependent RNA helicase PRP16 [EC:3.6.4.13]	-	GO:0032559;GO:0042623//ATPase activity, coupled	-	gi|68480399|ref|XP_715799.1|/0/hypothetical protein CaO19.10336 [Candida albicans SC5314]
orf19.2319	3.14771	0.934236	-	-	-	-	gi|68484295|ref|XP_713924.1|/0/hypothetical protein CaO19.2319 [Candida albicans SC5314]
orf19.3523	3.14669	0.978317	K15562|1|0.0|725|cal:CaO19.11006|serine/threonine-protein kinase BUR1 [EC:2.7.11.22 2.7.11.23]	-	GO:0004674//protein serine/threonine kinase activity;GO:0032559	GO:0006464//cellular protein modification process	gi|68482122|ref|XP_714945.1|/0/CDC2-related protein kinase [Candida albicans SC5314]
orf19.7648	3.14574	0.964284	K03327|1|0.0|899|cal:CaO19.7648|multidrug resistance protein, MATE family	GO:0044464//cell part	GO:0015291//secondary active transmembrane transporter activity	GO:0015893//drug transport	gi|68473203|ref|XP_719407.1|/0/potential MATE family drug/sodium antiporter [Candida albicans SC5314]
orf19.6186	3.14523	0.943757	K00924|1|9e-06|50.4|pic:PICST_38766|[EC:2.7.1.-]	-	GO:0016787//hydrolase activity	-	gi|68490496|ref|XP_710942.1|/0/hypothetical protein CaO19.6186 [Candida albicans SC5314]
orf19.2433	3.14449	0.889687	-	-	-	-	gi|68474830|ref|XP_718456.1|/2.41685e-89/hypothetical protein CaO19.2433 [Candida albicans SC5314]
orf19.5625	3.13918	0.846239	-	-	-	-	gi|68473721|ref|XP_719185.1|/9.67693e-58/hypothetical protein CaO19.5625 [Candida albicans SC5314]
orf19.3470	3.13912	0.931347	K15449|1|0.0|1343|cal:CaO19.3470|tRNA wybutosine-synthesizing protein 1	-	GO:0000166//nucleotide binding;GO:0051540;GO:0003824//catalytic activity	-	gi|68487254|ref|XP_712510.1|/0/hypothetical protein CaO19.3470 [Candida albicans SC5314]
orf19.6826	3.13728	0.929943	-	-	-	-	gi|68472245|ref|XP_719918.1|/1.72363e-175/potential polysome-associated RNA binding protein [Candida albicans SC5314]
orf19.6219	3.13634	0.936024	-	-	-	-	gi|68474198|ref|XP_718808.1|/0/hypothetical protein CaO19.6219 [Candida albicans SC5314]
orf19.5015	3.13267	0.961752	K01553|1|0.0|2540|pic:PICST_75361|myosin ATPase [EC:3.6.4.1];K10352|2|3e-151|536|sce:YHR023W|myosin heavy chain	GO:0015629//actin cytoskeleton	GO:0003779//actin binding;GO:0017111//nucleoside-triphosphatase activity;GO:0032559	-	gi|68467343|ref|XP_722333.1|/0/hypothetical protein CaO19.12482 [Candida albicans SC5314]
orf19.4531	3.12903	0.981839	K08711|1|5e-56|219|cgr:CAGL0M01760g|ATP-binding cassette, subfamily G (WHITE), member 2, PDR;K08712|4|4e-55|216|sce:YDR011W|ATP-binding cassette, subfamily G (WHITE), member 2, SNQ2	GO:0044464//cell part	GO:0017111//nucleoside-triphosphatase activity;GO:0032559	GO:0009207	gi|68486315|ref|XP_712956.1|/0/hypothetical protein CaO19.4531 [Candida albicans SC5314]
orf19.6563	3.12716	0.915552	-	-	-	-	gi|68469224|ref|XP_721399.1|/0/hypothetical protein CaO19.6563 [Candida albicans SC5314]
orf19.1741	3.12692	0.895878	-	-	-	-	gi|68491926|ref|XP_710261.1|/0/potential dityrosine synthesis protein Dit1p [Candida albicans SC5314]
orf19.1844	3.12415	0.804221	K00521|1|6e-169|593|pic:PICST_40289|ferric-chelate reductase [EC:1.16.1.7]	GO:0031224//intrinsic to membrane	GO:0016723//oxidoreductase activity, oxidizing metal ions, NAD or NADP as acceptor;GO:0046914//transition metal ion binding;GO:0050662//coenzyme binding	GO:0008152//metabolic process	gi|68490279|ref|XP_711030.1|/0/likely ferric reductase [Candida albicans SC5314]
orf19.5049	3.12319	0.912525	K14784|1|4e-146|516|cal:CaO19.12516|protein CMS1	-	-	-	gi|68476589|ref|XP_717587.1|/3.72784e-145/hypothetical protein CaO19.5049 [Candida albicans SC5314]
orf19.1697	3.1218	0.985581	-	-	GO:0046914//transition metal ion binding	-	gi|68468419|ref|XP_721769.1|/5.5291e-167/hypothetical protein CaO19.1697 [Candida albicans SC5314]
orf19.4900	3.11946	0.95402	K05538|1|0.0|1577|cal:CaO19.4900|alpha 1,3-mannosyltransferase [EC:2.4.1.-]	-	GO:0016740//transferase activity	GO:0006464//cellular protein modification process	gi|68465009|ref|XP_723582.1|/0/hypothetical protein CaO19.4900 [Candida albicans SC5314]
orf19.862	3.1171	0.94117	-	-	-	-	gi|68469709|ref|XP_721106.1|/1.24931e-98/hypothetical protein CaO19.8481 [Candida albicans SC5314]
orf19.5226	3.11345	0.978647	K01867|1|0.0|854|cal:CaO19.5226|tryptophanyl-tRNA synthetase [EC:6.1.1.2]	GO:0044424//intracellular part	GO:0004812//aminoacyl-tRNA ligase activity;GO:0032559	GO:0006418//tRNA aminoacylation for protein translation	gi|68479103|ref|XP_716357.1|/0/hypothetical protein CaO19.12691 [Candida albicans SC5314]
orf19.6568	3.10845	0.952149	K01553|1|0.0|842|pic:PICST_31021|myosin ATPase [EC:3.6.4.1];K12614|2|5e-95|348|ani:AN3460.2|ATP-dependent RNA helicase DDX6/DHH1 [EC:3.6.4.13];K06636|4|5e-24|113|sce:YFL008W|structural maintenance of chromosome 1;K10866|5|9e-20|99.0|cal:CaO19.1648|DNA repair protein RAD50 [EC:3.6.-.-]	GO:0043232	GO:0032559	-	gi|68469234|ref|XP_721404.1|/0/potential nuclear DNA repair complex SMC ATPase [Candida albicans SC5314]
orf19.2360	3.10563	0.983765	K11541|1|0.0|4313|cal:CaO19.2360|carbamoyl-phosphate synthase / aspartate carbamoyltransferase [EC:6.3.5.5 2.1.3.2]	-	GO:0016743//carboxyl- or carbamoyltransferase activity;GO:0031406//carboxylic acid binding;GO:0032559	GO:0009064//glutamine family amino acid metabolic process;GO:0006220//pyrimidine nucleotide metabolic process;GO:0019856//pyrimidine nucleobase biosynthetic process	gi|68486937|ref|XP_712650.1|/0/aspartate transcarbamylase [Candida albicans SC5314]
orf19.1445	3.10446	0.842359	K03439|1|1e-76|287|ani:AN3660.2|tRNA (guanine-N7-)-methyltransferase [EC:2.1.1.33]	GO:0044464//cell part	-	-	gi|68466599|ref|XP_722495.1|/0/hypothetical protein CaO19.1445 [Candida albicans SC5314]
orf19.6209	3.10322	0.976556	-	-	-	GO:0006810//transport	gi|68474180|ref|XP_718799.1|/0/hypothetical protein CaO19.6209 [Candida albicans SC5314]
orf19.2209	3.10302	0.947361	-	GO:0016020//membrane	-	GO:0006810//transport	gi|68480005|ref|XP_716049.1|/0/hypothetical protein CaO19.2209 [Candida albicans SC5314]
orf19.342	3.0954	0.897997	K13682|1|0.0|1247|cal:CaO19.342|beta-1,2-mannosyltransferase [EC:2.4.1.-]	-	-	-	gi|68471727|ref|XP_720170.1|/0/hypothetical WRY family protein 8 [Candida albicans SC5314]
orf19.2889	3.09393	0.909113	K11667|1|4e-71|265|cal:CaO19.2889|INO80 complex subunit C	-	-	-	gi|238881247|gb|EEQ44885.1|/3.64351e-70/conserved hypothetical protein [Candida albicans WO-1]
orf19.5056	3.09266	0.90295	K03357|1|0.0|668|cal:CaO19.5056|anaphase-promoting complex subunit 10	-	-	-	gi|68476603|ref|XP_717594.1|/0/potential anaphase-promoting complex processivity factor Apc10 [Candida albicans SC5314]
orf19.5035	3.08746	0.96676	-	-	-	-	gi|68467379|ref|XP_722351.1|/0/hypothetical protein CaO19.12502 [Candida albicans SC5314]
orf19.4707	3.08416	0.91126	K01117|1|0.0|696|pic:PICST_51970|sphingomyelin phosphodiesterase [EC:3.1.4.12];K01128|2|2e-60|233|afm:AFUA_2G01600|[EC:3.1.4.-];K12350|3|1e-41|171|mgr:MGCH7_ch7g1043|sphingomyelin phosphodiesterase [EC:3.1.4.12]	-	GO:0003824//catalytic activity	-	gi|68466289|ref|XP_722919.1|/0/potential acid sphingomyelin phosphodiesterase [Candida albicans SC5314]
orf19.4243	3.08194	0.919735	-	-	-	-	gi|68470613|ref|XP_720552.1|/1.28498e-144/hypothetical protein CaO19.4243 [Candida albicans SC5314]
orf19.1270	3.07656	0.942518	K00521|1|2e-125|449|pic:PICST_40289|ferric-chelate reductase [EC:1.16.1.7]	GO:0031224//intrinsic to membrane	GO:0046914//transition metal ion binding;GO:0003824//catalytic activity;GO:0050662//coenzyme binding	GO:0008152//metabolic process	gi|68478832|ref|XP_716578.1|/0/likely ferric reductase [Candida albicans SC5314]
orf19.1255	3.07507	0.823648	K09240|1|2e-06|54.7|ctp:CTRG_03210|transcriptional regulatory protein CAT8	-	GO:0046872//metal ion binding	GO:0006351//transcription, DNA-dependent	gi|238881314|gb|EEQ44952.1|/0/conserved hypothetical protein [Candida albicans WO-1]
orf19.3231	3.07313	0.900308	K03350|1|0.0|1340|cal:CaO19.3231|anaphase-promoting complex subunit 3	-	GO:0003824//catalytic activity	GO:0009987//cellular process	gi|68475963|ref|XP_717922.1|/0/potential anaphase promoting complex TPR repeat subunit Cdc27 [Candida albicans SC5314]
orf19.2303	3.07255	0.942078	K12851|1|6e-116|415|cal:CaO19.2303|pre-mRNA-splicing factor 38;K12849|5|5e-32|136|cci:CC1G_05189|pre-mRNA-splicing factor 38A	-	-	-	gi|68484148|ref|XP_713966.1|/5.43375e-115/potential spliceosomal U4/U6.U5 tri-snRNP factor PRP38 [Candida albicans SC5314]
orf19.7503	3.07232	0.92378	K01452|1|0.0|740|cal:CaO19.7503|chitin deacetylase [EC:3.5.1.41]	-	GO:0016811//hydrolase activity, acting on carbon-nitrogen (but not peptide) bonds, in linear amides	GO:0044238//primary metabolic process	gi|68474574|ref|XP_718660.1|/0/hypothetical protein CaO19.7503 [Candida albicans SC5314]
orf19.2468	3.0723	0.905729	K06127|1|1e-05|50.1|ani:AN1743.2|ubiquinone biosynthesis methyltransferase [EC:2.1.1.201]	-	GO:0016741	GO:0006730//one-carbon metabolic process	gi|68474896|ref|XP_718489.1|/8.64683e-179/hypothetical protein CaO19.2468 [Candida albicans SC5314]
orf19.2990	3.07199	0.925541	K01210|1|0.0|934|cal:CaO19.2990|glucan 1,3-beta-glucosidase [EC:3.2.1.58]	-	GO:0043167//ion binding;GO:0008422//beta-glucosidase activity	GO:0044238//primary metabolic process	gi|224471898|sp|P29717.4|EXG_CANAL/0/RecName: Full=Glucan 1,3-beta-glucosidase; AltName: Full=Exo-1,3-beta-glucanase; Flags: Precursor
orf19.1327	3.0705	0.897034	-	-	-	-	gi|68486235|ref|XP_709966.1|/2.05302e-149/potential cell surface protein [Candida albicans SC5314]
orf19.879	3.06849	0.952094	-	-	-	-	gi|68469743|ref|XP_721123.1|/0/hypothetical protein CaO19.8498 [Candida albicans SC5314]
orf19.5367	3.06462	0.855539	K10877|1|0.0|1491|cal:CaO19.12827|DNA repair and recombination protein RAD54B [EC:3.6.4.-]	-	GO:0003676//nucleic acid binding;GO:0017111//nucleoside-triphosphatase activity;GO:0032559	-	gi|68477713|ref|XP_717169.1|/0/hypothetical protein CaO19.5367 [Candida albicans SC5314]
orf19.4691	3.06046	0.839442	-	-	-	-	gi|68466552|ref|XP_722758.1|/1.32065e-118/hypothetical protein CaO19.4691 [Candida albicans SC5314]
orf19.889	3.0592	0.948682	K00877|1|0.0|1004|cal:CaO19.8508|hydroxymethylpyrimidine/phosphomethylpyrimidine kinase [EC:2.7.1.49 2.7.4.7]	-	GO:0016301//kinase activity	GO:0006772//thiamine metabolic process;GO:0006796//phosphate-containing compound metabolic process	gi|68469759|ref|XP_721131.1|/0/hypothetical protein CaO19.8508 [Candida albicans SC5314]
orf19.5051	3.05588	0.871746	-	-	-	-	gi|68476593|ref|XP_717589.1|/0/hypothetical protein CaO19.5051 [Candida albicans SC5314]
orf19.6997	3.05539	0.863629	K07034|1|8e-66|249|pgu:PGUG_02480|	GO:0044464//cell part	-	-	gi|68482787|ref|XP_714703.1|/4.11755e-161/possible transmembrane sensor/transporter [Candida albicans SC5314]
orf19.1115	3.05408	0.941638	K00942|1|4e-105|379|cal:CaO19.1115|guanylate kinase [EC:2.7.4.8]	GO:0044424//intracellular part	GO:0016776//phosphotransferase activity, phosphate group as acceptor;GO:0032559	GO:0009117//nucleotide metabolic process;GO:0006796//phosphate-containing compound metabolic process	gi|238882763|gb|EEQ46401.1|/3.62003e-104/guanylate kinase [Candida albicans WO-1]
orf19.4096	3.04109	0.923697	K13511|1|0.0|847|cal:CaO19.11577|monolysocardiolipin acyltransferase [EC:2.3.1.-]	-	GO:0016747//transferase activity, transferring acyl groups other than amino-acyl groups	-	gi|68483628|ref|XP_714267.1|/0/hypothetical protein CaO19.4096 [Candida albicans SC5314]
orf19.832	3.04086	0.915305	K05288|1|0.0|1551|cal:CaO19.8452|phosphatidylinositol glycan, class O	-	GO:0003824//catalytic activity	-	gi|68469892|ref|XP_720956.1|/0/hypothetical protein CaO19.832 [Candida albicans SC5314]
orf19.1900	3.03255	0.944857	K14292|1|0.0|822|cal:CaO19.1900|trimethylguanosine synthase [EC:2.1.1.-]	-	-	GO:0016070//RNA metabolic process	gi|68485845|ref|XP_713203.1|/0/potential TrimethylGuanosine Synthase [Candida albicans SC5314]
orf19.1651	3.03128	0.918029	-	-	-	-	gi|68468337|ref|XP_721728.1|/2.68875e-97/hypothetical protein CaO19.1651 [Candida albicans SC5314]
orf19.7380	3.02998	0.868389	-	-	-	-	gi|68478705|ref|XP_716621.1|/0/hypothetical protein CaO19.7380 [Candida albicans SC5314]
orf19.4856	3.02859	0.846211	K01175|1|2e-70|265|afm:AFUA_7G00110|[EC:3.1.-.-];K01046|3|5e-37|154|afm:AFUA_5G14150|triacylglycerol lipase [EC:3.1.1.3]	-	GO:0004091//carboxylesterase activity	GO:0006629//lipid metabolic process	gi|68464927|ref|XP_723541.1|/0/C. albicans secretory lipase 3 [Candida albicans SC5314]
orf19.1822	3.02599	0.89929	K09243|1|5e-10|66.2|sce:YDR207C|transcriptional regulatory protein UME6;K09245|3|4e-06|53.1|ppa:PAS_chr1-4_0401|transcriptional activator protein UGA3	GO:0043231//intracellular membrane-bounded organelle	GO:0046914//transition metal ion binding;GO:0001071//nucleic acid binding transcription factor activity	GO:0006351//transcription, DNA-dependent	gi|68490609|ref|XP_710873.1|/0/potential fungal zinc cluster transcription factor [Candida albicans SC5314]
orf19.2996	3.02332	0.967943	-	-	-	-	gi|68468871|ref|XP_721494.1|/0/hypothetical protein CaO19.2996 [Candida albicans SC5314]
orf19.4414	3.0209	0.967641	K04718|1|7e-08|57.8|nhe:NECHADRAFT_104662|sphingosine kinase [EC:2.7.1.91]	-	-	-	gi|68488573|ref|XP_711862.1|/0/hypothetical protein CaO19.4414 [Candida albicans SC5314]
orf19.3362	3.01951	0.840378	K00356|1|4e-122|437|pic:PICST_58800|NADH dehydrogenase [EC:1.6.99.3];K00540|2|9e-81|300|dha:DEHA2E02574g|[EC:1.-.-.-];K00383|4|8e-08|57.8|ppa:PAS_chr3_1011|glutathione reductase (NADPH) [EC:1.8.1.7];K03885|5|4e-07|55.5|sce:YML120C|NADH dehydrogenase [EC:1.6.99.3]	-	GO:0050662//coenzyme binding;GO:0003824//catalytic activity	GO:0008152//metabolic process	gi|68489077|ref|XP_711604.1|/0/possible oxidoreductase [Candida albicans SC5314]
orf19.3744	3.01871	0.94948	K08876|1|0.0|1229|cal:CaO19.11229|SCY1-like	-	GO:0016772//transferase activity, transferring phosphorus-containing groups	GO:0006796//phosphate-containing compound metabolic process	gi|68485271|ref|XP_713469.1|/0/hypothetical protein CaO19.11229 [Candida albicans SC5314]
orf19.570	3.01801	0.816301	K01186|1|1e-56|220|pic:PICST_61722|sialidase-1 [EC:3.2.1.18]	-	-	-	gi|68483685|ref|XP_714201.1|/5.70344e-152/hypothetical protein CaO19.570 [Candida albicans SC5314]
orf19.4017	3.01428	0.936575	-	-	-	-	gi|68467855|ref|XP_722086.1|/3.66659e-180/hypothetical protein CaO19.11500 [Candida albicans SC5314]
orf19.663	3.01275	0.947499	K06668|1|3e-128|459|kla:KLLA0C01650g|serine/threonine-protein kinase GIN4 [EC:2.7.11.-]	-	GO:0004672//protein kinase activity;GO:0032559	GO:0006464//cellular protein modification process	gi|68484451|ref|XP_713836.1|/0/likely protein kinase [Candida albicans SC5314]
orf19.7157	3.01216	0.874223	-	-	-	-	gi|241957743|ref|XP_002421591.1|/4.38819e-104/conserved hypothetical protein [Candida dubliniensis CD36]
orf19.2389	3.01015	0.894557	K10729|1|5e-174|609|cal:CaO19.2389|DNA replication regulator SLD2	-	-	-	gi|74584981|sp|Q59UH5.1|SLD2_CANAL/5.18604e-173/RecName: Full=DNA replication regulator SLD2
orf19.3471	3.00682	0.865307	-	-	-	-	gi|68487256|ref|XP_712511.1|/6.08655e-28/hypothetical protein CaO19.3471 [Candida albicans SC5314]
orf19.4437	3.00648	0.955974	K01509|1|0.0|1355|pic:PICST_39246|adenosinetriphosphatase [EC:3.6.1.3];K11786|3|2e-130|466|clu:CLUG_04560|ATP-dependent helicase STH1/SNF2 [EC:3.6.4.-]	GO:0043231//intracellular membrane-bounded organelle;GO:0043234//protein complex	GO:0017111//nucleoside-triphosphatase activity;GO:0003676//nucleic acid binding;GO:0003682//chromatin binding;GO:0032559	GO:0009207;GO:0006338//chromatin remodeling	gi|238878835|gb|EEQ42473.1|/0/chromatin remodelling complex ATPase chain ISW1 [Candida albicans WO-1]
orf19.5258	3.00305	0.925953	K01768|1|7e-06|52.0|vpo:Kpol_534p51|adenylate cyclase [EC:4.6.1.1]	-	-	-	gi|68479167|ref|XP_716389.1|/0/Leucine Rich Repeat protein [Candida albicans SC5314]
orf19.4743	3.00241	0.899978	K06916|1|9e-39|161|cci:CC1G_01327|	-	GO:0032559	-	gi|68464705|ref|XP_723430.1|/0/potential mitochondrial ATPase [Candida albicans SC5314]
orf19.4505	3.00231	0.939767	K13953|1|2e-140|497|cal:CaO19.11980|alcohol dehydrogenase, propanol-preferring [EC:1.1.1.1]	-	GO:0016616//oxidoreductase activity, acting on the CH-OH group of donors, NAD or NADP as acceptor;GO:0046914//transition metal ion binding	GO:0008152//metabolic process	gi|68486457|ref|XP_712899.1|/7.11411e-161/potential secondary alcohol dehydrogenase [Candida albicans SC5314]
orf19.4142	3.00059	0.903032	K14997|1|0.0|556|cdu:CD36_50880|solute carrier family 38 (sodium-coupled neutral amino acid transporter), member 11	GO:0031224//intrinsic to membrane	-	-	gi|238882550|gb|EEQ46188.1|/0/conserved hypothetical protein [Candida albicans WO-1]
orf19.5519	-3.02514	0.987618	K00605|1|0.0|681|cal:CaO19.12965|aminomethyltransferase [EC:2.1.2.10]	GO:0044424//intracellular part	GO:0016769//transferase activity, transferring nitrogenous groups;GO:0008168//methyltransferase activity	GO:0006730//one-carbon metabolic process;GO:0006544//glycine metabolic process	gi|68473519|ref|XP_719084.1|/0/hypothetical protein CaO19.5519 [Candida albicans SC5314]
orf19.3160	-3.03925	0.991938	-	-	-	GO:0050896//response to stimulus	gi|68482895|ref|XP_714578.1|/4.12565e-89/hypothetical protein CaO19.3160 [Candida albicans SC5314]
orf19.4886	-3.04884	0.98704	-	-	-	-	gi|68464983|ref|XP_723569.1|/2.46413e-118/hypothetical protein CaO19.4886 [Candida albicans SC5314]
orf19.3997	-3.08105	0.995212	K13953|1|0.0|713|cal:CaO19.3997|alcohol dehydrogenase, propanol-preferring [EC:1.1.1.1]	-	GO:0016616//oxidoreductase activity, acting on the CH-OH group of donors, NAD or NADP as acceptor;GO:0046914//transition metal ion binding	GO:0008152//metabolic process	gi|68468132|ref|XP_721905.1|/0/hypothetical protein CaO19.3997 [Candida albicans SC5314]
orf19.5960	-3.08807	0.994662	-	-	-	-	gi|68465619|ref|XP_723171.1|/4.38027e-54/potential non-classical secretion pathway protein [Candida albicans SC5314]
orf19.6814	-3.08902	0.995267	K00134|1|0.0|662|cal:CaO19.14106|glyceraldehyde 3-phosphate dehydrogenase [EC:1.2.1.12]	GO:0044424//intracellular part	GO:0000166//nucleotide binding	GO:0006007//glucose catabolic process	gi|68472227|ref|XP_719909.1|/0/glyceraldehyde-3-phosphate dehydrogenase [Candida albicans SC5314]
orf19.4526	-3.09691	0.987948	-	GO:0044464//cell part	GO:0015075//ion transmembrane transporter activity	GO:0050896//response to stimulus;GO:0006810//transport	gi|68486305|ref|XP_712951.1|/0/hypothetical protein CaO19.4526 [Candida albicans SC5314]
orf19.638	-3.14016	0.994167	K00122|1|0.0|760|cal:CaO19.638|formate dehydrogenase [EC:1.2.1.2]	-	GO:0016620//oxidoreductase activity, acting on the aldehyde or oxo group of donors, NAD or NADP as acceptor;GO:0016614//oxidoreductase activity, acting on CH-OH group of donors;GO:0000166//nucleotide binding	GO:0008152//metabolic process	gi|68488257|ref|XP_712004.1|/0/potential NAD-formate dehydrogenase [Candida albicans SC5314]
orf19.4216	-3.14042	0.992763	-	-	-	GO:0050896//response to stimulus	gi|68470302|ref|XP_720655.1|/5.38827e-89/hypothetical protein CaO19.11692 [Candida albicans SC5314]
orf19.2020	-3.15818	0.994662	K08139|1|0.0|1008|cal:CaO19.2020|MFS transporter, SP family, sugar:H+ symporter	GO:0031224//intrinsic to membrane	GO:0022857//transmembrane transporter activity	GO:0006810//transport	gi|68472555|ref|XP_719596.1|/0/potential hexose transporter [Candida albicans SC5314]
orf19.2758	-3.20436	0.985526	K01183|1|4e-07|55.8|dha:DEHA2D00924g|chitinase [EC:3.2.1.14]	-	-	-	gi|68471458|ref|XP_720277.1|/1.27253e-147/possible cell wall protein [Candida albicans SC5314]
orf19.1467	-3.23318	0.99502	K02266|1|2e-76|282|cal:CaO19.9042|cytochrome c oxidase subunit 6a	GO:0005746//mitochondrial respiratory chain	GO:0015002//heme-copper terminal oxidase activity	GO:0008152//metabolic process	gi|68466643|ref|XP_722517.1|/2.22478e-75/hypothetical protein CaO19.1467 [Candida albicans SC5314]
orf19.5288	-3.23572	0.994992	K00004|1|3e-109|394|pgu:PGUG_04220|(R,R)-butanediol dehydrogenase / diacetyl reductase [EC:1.1.1.4 1.1.1.303]	-	GO:0016616//oxidoreductase activity, acting on the CH-OH group of donors, NAD or NADP as acceptor;GO:0046914//transition metal ion binding	GO:0008152//metabolic process	gi|68491685|ref|XP_710369.1|/0/potential butanediol dehydrogenase [Candida albicans SC5314]
orf19.4450.1	-3.25794	0.994222	-	-	-	-	gi|238878850|gb|EEQ42488.1|/7.19546e-34/predicted protein [Candida albicans WO-1]
orf19.5213.1	-3.27237	0.994909	K02272|1|9e-50|193|cdu:CD36_20340|cytochrome c oxidase subunit 7c	-	GO:0015002//heme-copper terminal oxidase activity	GO:0008152//metabolic process	gi|238882356|gb|EEQ45994.1|/7.25475e-50/conserved hypothetical protein [Candida albicans WO-1]
orf19.2608	-3.40456	0.99535	K13953|1|2e-177|620|cal:CaO19.10139|alcohol dehydrogenase, propanol-preferring [EC:1.1.1.1]	-	GO:0046914//transition metal ion binding;GO:0004033//aldo-keto reductase (NADP) activity	GO:0008152//metabolic process	gi|455509188|gb|AGG35486.1|/2.08689e-176/alcohol dehydrogenase, partial [Candida albicans]
orf19.2768	-3.40592	0.991057	K01191|1|0.0|2234|cal:CaO19.10284|alpha-mannosidase [EC:3.2.1.24]	-	GO:0046914//transition metal ion binding;GO:0015923//mannosidase activity	GO:0019318//hexose metabolic process	gi|68471022|ref|XP_720518.1|/0/hypothetical protein CaO19.2768 [Candida albicans SC5314]
orf19.5006	-3.45292	0.994001	K02437|1|2e-87|320|cal:CaO19.12473|glycine cleavage system H protein	GO:0043234//protein complex	-	GO:0006546//glycine catabolic process	gi|68467325|ref|XP_722324.1|/1.69237e-86/hypothetical protein CaO19.12473 [Candida albicans SC5314]
orf19.1353	-3.48484	0.97895	-	-	-	-	gi|68491956|ref|XP_710245.1|/1.73307e-62/hypothetical protein CaO19.8933 [Candida albicans SC5314]
orf19.7586	-3.49304	0.984618	K01183|1|0.0|635|cal:CaO19.7586|chitinase [EC:3.2.1.14]	-	GO:0004553//hydrolase activity, hydrolyzing O-glycosyl compounds;GO:0043167//ion binding	GO:0044238//primary metabolic process	gi|238880375|gb|EEQ44013.1|/1.28426e-180/hypothetical protein CAWG_02272 [Candida albicans WO-1]
orf19.2107.1	-3.51563	0.995405	-	-	-	-	gi|238881839|gb|EEQ45477.1|/1.25337e-41/conserved hypothetical protein [Candida albicans WO-1]
orf19.3612	-3.51798	0.989048	K03809|1|3e-116|416|cal:CaO19.11095|Trp repressor binding protein	-	GO:0000166//nucleotide binding;GO:0003824//catalytic activity	-	gi|238883737|gb|EEQ47375.1|/2.33117e-115/protoplast secreted protein 2 precursor [Candida albicans WO-1]
orf19.4947	-3.52701	0.99513	-	-	-	-	gi|238878301|gb|EEQ41939.1|/1.8289e-84/conserved hypothetical protein [Candida albicans WO-1]
orf19.3870	-3.55793	0.993836	K01756|1|0.0|951|cal:CaO19.3870|adenylosuccinate lyase [EC:4.3.2.2]	-	GO:0016842	GO:0006164//purine nucleotide biosynthetic process	gi|68485172|ref|XP_713495.1|/0/hypothetical protein CaO19.3870 [Candida albicans SC5314]
orf19.5305	-3.58248	0.992268	-	-	-	-	gi|68477591|ref|XP_717108.1|/8.12641e-79/hypothetical LDG family protein 7 [Candida albicans SC5314]
orf19.3548.1	-3.62825	0.995487	-	-	-	GO:0050896//response to stimulus	gi|1175015|sp|P43074.1|WHS11_CANAW/2.41313e-29/RecName: Full=White colony protein WHS11
orf19.1354	-3.64035	0.995377	-	GO:0016020//membrane	-	-	gi|74584088|sp|Q59KG2.1|RGI1_CANAL/8.5602e-118/RecName: Full=Respiratory growth induced protein 1
orf19.7676	-3.69933	0.995515	K05351|1|0.0|677|cal:CaO19.7676|D-xylulose reductase [EC:1.1.1.9]	-	GO:0046914//transition metal ion binding;GO:0016616//oxidoreductase activity, acting on the CH-OH group of donors, NAD or NADP as acceptor	GO:0019321//pentose metabolic process	gi|238880445|gb|EEQ44083.1|/0/D-xylulose reductase [Candida albicans WO-1]
orf19.3940.1	-3.70552	0.995542	-	-	-	-	gi|6164951|gb|AAF04594.1|AF193509_1/3.14785e-13/copper resistance-associated metallothionein [Candida albicans]
orf19.4910	-3.90019	0.984178	-	-	-	-	gi|68465029|ref|XP_723592.1|/1.35447e-69/hypothetical protein CaO19.4910 [Candida albicans SC5314]
orf19.2849	-4.03015	0.995157	K09885|1|2e-130|464|cal:CaO19.2849|aquaporin rerated protein, other eukaryote	GO:0031224//intrinsic to membrane	-	GO:0006810//transport	gi|68480466|ref|XP_715831.1|/1.78126e-129/potential aquaporin water channel protein [Candida albicans SC5314]
orf19.1996	-4.18522	0.994222	K01752|1|5e-37|89.7|sce:YCL064C|L-serine dehydratase [EC:4.3.1.17] K01754 threonine dehydratase [EC:4.3.1.19];K01754|5|6e-15|68.6|afm:AFUA_4G07810|threonine dehydratase [EC:4.3.1.19]	-	GO:0016841//ammonia-lyase activity;GO:0048037//cofactor binding	GO:0019752//carboxylic acid metabolic process	gi|68472513|ref|XP_719575.1|/1.10857e-174/hypothetical protein CaO19.9548 [Candida albicans SC5314]
orf19.6139	-4.36263	0.992928	K00521|1|8e-151|533|pic:PICST_40289|ferric-chelate reductase [EC:1.16.1.7]	GO:0031224//intrinsic to membrane	GO:0016723//oxidoreductase activity, oxidizing metal ions, NAD or NADP as acceptor;GO:0046914//transition metal ion binding;GO:0050662//coenzyme binding	GO:0008152//metabolic process	gi|241959040|ref|XP_002422239.1|/0/ferric reductase transmembrane component precursor, putative; ferric-chelate reductase, putative [Candida dubliniensis CD36]
orf19.3646	-4.52384	0.996038	K14686|1|2e-37|155|pgu:PGUG_03813|solute carrier family 31 (copper transporter), member 1	-	-	GO:0006825//copper ion transport	gi|68489594|ref|XP_711367.1|/3.67497e-107/hypothetical protein CaO19.11130 [Candida albicans SC5314]
orf19.7111.1	-4.5544	0.995487	K04564|1|5e-110|395|cdu:CD36_70320|superoxide dismutase, Fe-Mn family [EC:1.15.1.1]	GO:0005739//mitochondrion	GO:0016209//antioxidant activity;GO:0043169//cation binding;GO:0003824//catalytic activity	GO:0072593//reactive oxygen species metabolic process	gi|374977569|pdb|3QVN|A/2.16511e-113/Chain A, Crystal Structure Of Cytosolic Mnsod3 From Candida Albicans

## Sheet: Supporting Information TABLE S2
Supporting Information TABLE S2: A list of primers used in real-time PCR analysis and comparison in the changes of gene expression determined by RNA-Seq and real-time PCR approaches.
Target gene	Primer sequence (5′-3′)	log2Ratio determinedby RNA-Seq	Fold change of the gene expression determined by real-time PCR
Actin	Actin-F:CCAGAAGCTTTGTTCAGACCA
	Actin-R:AGAACCACCAATCCAGACAGA
SPO22	SPO22-F: AGGAAATGAAAAATTGGCACT	7.7	4.2
	ERG9-R: AAAATCTTGACAACCCCTGG
ERG11	ERG11-F: CCCTGAAGATTTTGATCCAAC	2	2.8
	ERG11-R: GGTTCCCAATTGAACATAAGC
ERG24	ERG24-F: ATGCTGGCTGGCCTATTTA	2.5	1.5
	ERG24-R: TTCAAGAGAGCTGTCGCTGTT
CDR1	CDR1-F: CCAGGATTTTGGATTTTCATG	2.4	4.1
	CDR1-R: CAGAATGCACAAGATCCATCA
CDR2	CDR2-F: AATGCTGCTAATTTGGCTACA	5.3	3.6
	CDR2-R: AAATAACCACCAGCAGCTTCG
CDR4	CDR4-F: TGACAAAGGAGCAGTTACCAG	-2.5	0.02
	CDR4-R: CCTGCAACCTTCATATATGGC
Ndt80	Ndt80-F: CCTGACCACGAGACTGTCAAA	4.9	1.8
	Ndt80-R: CCCAATAATTCGACATGCAAG
FLU1	FLU1-F: TGGCTTGGTTGGACTGGTAAT	1.8	2.1
	FLU1-R: CCCTAAAAGTGTACTTGCCCA

## Sheet: Supporting Information TABLE S3
Supporting Information TABLE S3: Significant pathways of DEGs.
Term	Database	ID	Input gene	Background Gene	P-Value	FDR
Meiosis - yeast	KEGG	cal04113	23	151	1.12e-09	2.4e-06
Cell cycle - yeast	KEGG	cal04111	23	177	1.74e-08	1.85e-05
DNA replication	KEGG	cal03030	11	64	1.07e-05	0.00328
chromosome	GO	GO:0005694	32	326	1.24e-06	0.000883
cell cycle	GO	GO:0007049	50	657	2.14e-06	0.00101
cell cycle process	GO	GO:0022402	47	606	2.65e-06	0.00101
chromosomal part	GO	GO:0044427	30	307	2.84e-06	0.00101
double-strand break repair	GO	GO:0006302	13	79	1.68e-05	0.00449
double-strand break repair via homologous recombination	GO	GO:0000724	11	57	2.03e-05	0.00481
recombinational repair	GO	GO:0000725	11	60	3.08e-05	0.00658
transmembrane transporter activity	GO	GO:0022857	32	393	4.05e-05	0.00786
DNA recombination	GO	GO:0006310	16	135	7.35e-05	0.0131
meiotic cell cycle	GO	GO:0051321	24	267	8.84e-05	0.0145
DNA repair	GO	GO:0006281	20	212	0.000183	0.0279
DNA replication	GO	GO:0006260	16	151	0.000239	0.0307
chromosome segregation	GO	GO:0007059	16	152	0.000255	0.0307
nuclear division	GO	GO:0000280	22	253	0.00026	0.0307
meiotic cell cycle process	GO	GO:1903046	21	236	0.000267	0.0307
extracellular region	GO	GO:0005576	16	153	0.000273	0.0307
DNA metabolic process	GO	GO:0006259	30	406	0.000327	0.034
organelle fission	GO	GO:0048285	22	258	0.000334	0.034
transporter activity	GO	GO:0005215	33	469	0.000386	0.0375
replication fork	GO	GO:0005657	9	58	0.00048	0.0446
nuclear replication fork	GO	GO:0043596	8	46	0.000501	0.0446
double-strand break repair via break-induced replication	GO	GO:0000727	6	25	0.000586	0.0482
movement of cell or subcellular component	GO	GO:0006928	6	25	0.000586	0.0482
